# Supplementary material
Source: publisher figshare collection journal article supplement (https://gsajournals.figshare.com/ndownloader/files/14361092)
Supplement: Supplementary file 1 [file 14361092]

## Sheet: Sheet1
Entry	all_trials_avg_SpkWt_g	all_trials_avg_SpkLen_cm	all_trials_avg_Spklt_num	all_trials_avg_ShattRes	all_trials_avg_Threshabl	all_trials_avg_Yield_g	all_trials_avg_TKW_g	all_trials_avg_SdArea_cm2	all_trials_avg_SdLen_cm	all_trials_avg_SdWdth_cm	all_trials_avg_Hgt_cm	all_trials_avg_Hdng	StP17_SpkWt_g	StP17_SpkLen_cm	StP17_Spklt_num	StP17_ShattRes	StP17_Threshabl	StP17_Yield_g	StP17_TKW_g	StP17_SdArea_cm2	StP17_SdLen_cm	StP17_SdWdth_cm	StP17_Hgt_cm	StP17_Hdng	StP18_SpkWt_g	StP18_SpkLen_cm	StP18_Spklt_num	StP18_ShattRes	StP18_Threshabl	StP18_Yield_g	StP18_TKW_g	StP18_SdArea_cm2	StP18_SdLen_cm	StP18_SdWdth_cm	StP18_Hgt_cm	StP18_Hdng	Crk18_SpkWt_g	Crk18_SpkLen_cm	Crk18_Spklt_num	Crk18_ShattRes	Crk18_Threshabl	Crk18_Yield_g	Crk18_TKW_g	Crk18_SdArea_cm2	Crk18_SdLen_cm	Crk18_SdWdth_cm	Crk18_Hgt_cm	Crk18_Hdng
H0225	1.0457	22.3113	17.8777	2.041	1.38453	56.4379	8.48147	8.54685	5.7165	1.75331	143.557	1.37797	1.1001	16.8454	15.846	2.3931	1.2843	55.9592	8.8825	8.7229	4.8494	1.56119	131.94	-0.635	1.12	27.09	19	2.67	1	48	8.45	8.53	5.96	2	150	1	0.917	22.9984	18.7872	1.0599	1.8693	65.3546	8.1119	8.38766	6.3401	1.69874	148.732	3.7689
H0226	0.942367	21.2146	21.1011	1.989	1.43465	59.8613	8.80147	7.66685	5.52983	0.996643	141.891	1.7113	0.9401	21.9254	19.846	2.7271	NA	62.4392	10.1925	6.9629	4.6594	1.39119	141.94	0.365	0.94	21.17	22.33	2.67	0.5	48.08	9.05	8.8	6.18	0	140	2	0.947	20.5484	21.1272	0.5699	2.3693	69.0646	7.1619	7.23766	5.7501	1.59874	143.732	2.7689
H0227	0.7757	19.7146	21.7677	0.446667	2.21787	56.5946	7.54813	6.76019	5.71317	1.06331	140.224	1.37797	0.7601	16.8454	20.846	0.1101	2.2843	54.0692	7.8625	5.8729	5.9194	1.63119	126.94	-0.635	0.63	19.05	22.33	0.5	2	44.68	8.01	7.76	5.79	0	135	2	0.937	23.2484	22.1272	0.7299	2.3693	71.0346	6.7719	6.64766	5.4301	1.55874	158.732	2.7689
H0228	0.969033	24.4013	21.8777	0.45	2.71787	52.7479	7.46147	7.35685	5.40317	1.45664	150.224	0.7113	0.9101	24.8854	20.846	0.1101	2.7843	57.8892	7.1225	7.1729	5.1794	1.61119	151.94	0.365	0.81	25.4	21	0.34	3	52.94	7.18	7.04	5.38	1	150	1	1.187	22.9184	23.7872	0.8999	2.3693	47.4146	8.0819	7.85766	5.6501	1.75874	148.732	0.7689
H0229	1.0157	21.2413	20.9911	0.384333	2.21787	61.3513	8.3048	7.41685	5.92983	1.18664	143.557	0.7113	0.8601	18.1154	19.846	0.0831	1.7843	48.6492	7.8625	5.5429	5.7294	1.80119	111.94	-0.635	1.18	23.71	24	0.34	3	56.92	7.98	7.76	5.65	0	160	1	1.007	21.8984	19.1272	0.7299	1.8693	78.4846	9.0719	8.94766	6.4101	1.75874	158.732	1.7689
H0230	1.02237	22.4546	19.5444	1.67	1.88453	54.5179	9.3048	9.29685	6.2365	1.20331	148.557	1.04463	1.0501	20.2354	19.846	0.1101	1.7843	55.1192	10.3625	11.2129	6.6094	1.88119	141.94	1.365	0.92	22.01	20	2	1.5	59.3	8.84	8.38	6.04	0	150	1	1.097	25.1184	18.7872	2.8999	2.3693	49.1346	8.7119	8.29766	6.0601	1.72874	153.732	0.7689
H0232	0.8257	25.1913	20.5444	1.28	3.21787	54.2913	6.93813	6.93352	5.91983	1.33664	151.891	1.04463	0.5201	26.1554	20.846	0.1101	3.2843	44.7192	6.0725	5.9029	5.5694	1.57119	151.94	2.365	0.93	25.4	20.33	3.33	3	66.88	7.94	7.97	5.96	1	155	1	1.027	24.0184	20.4572	0.3999	3.3693	51.2746	6.8019	6.92766	6.2301	1.43874	148.732	-0.2311
H0233	0.9457	24.5413	18.6577	3.431	2.21787	45.3879	10.1562	7.41145	5.2197	0.640595	106.891	1.37797	1.0101	24.0454	19.846	3.3931	2.2843	56.7292	11.0925	5.9329	4.0794	1.28119	81.9402	3.365	1.05	24.72	20	3.67	2	44.14	9.22	8.89	6.36	0	140	0	0.777	24.8584	16.1272	3.2299	2.3693	35.2946	NA	NA	NA	NA	98.7322	0.7689
H0234	0.949033	22.7646	19.7677	2.87333	1.5512	51.8246	8.80813	8.55685	5.77317	1.22998	121.891	1.7113	1.0101	25.1454	19.846	2.0601	3.2843	56.6992	8.6825	9.1029	5.9394	1.82119	116.94	3.365	1.04	20.74	20.67	4	0	59.09	8.22	7.83	5.59	0	135	1	0.797	22.4084	18.7872	2.5599	1.3693	39.6846	9.5219	8.73766	5.7901	1.86874	113.732	0.7689
H0235	1.1557	23.3013	18.2111	0.666667	1.5512	77.0079	8.1548	7.83019	5.84317	1.44998	148.557	1.04463	1.0501	21.9254	16.846	0.1101	2.2843	75.0792	7.9325	7.4829	5.5894	1.66119	136.94	3.365	1.39	22.44	20	0.83	0.5	74.27	8.27	8.15	6.06	1	150	0	1.027	25.5384	17.7872	1.0599	1.8693	81.6746	8.2619	7.85766	5.8801	1.68874	158.732	-0.2311
H0236	0.9357	19.8046	17.2144	2.77	1.21787	53.5579	9.90813	8.65685	6.41317	1.20998	130.224	0.7113	0.4401	17.6954	15.846	1.4101	0.7843	40.6792	8.6925	6.3529	6.1994	1.71119	91.9402	-0.635	1.25	19.9	18.67	3.67	1	61.74	10.43	9.28	6.28	0	145	1	1.117	21.8184	17.1272	3.2299	1.8693	58.2546	10.6019	10.3377	6.7601	1.91874	153.732	1.7689
H0238	1.1057	24.2046	20.5444	0.503333	1.21787	53.5879	7.7448	7.47352	6.06317	1.07331	146.891	1.37797	1.1601	22.7754	18.846	0.1101	1.7843	62.5992	7.7325	7.1129	6.3294	1.58119	141.94	2.365	1.07	24.98	23	0.83	0.5	58.25	7.6	7.56	5.85	0	170	1	1.087	24.8584	19.7872	0.5699	1.3693	39.9146	7.9019	7.74766	6.0101	1.63874	128.732	0.7689
H0239	0.979033	25.8413	19.3244	2.44333	1.88453	51.8913	8.34813	8.33019	6.80983	1.13664	153.557	1.04463	0.8701	27.0054	18.846	0.7601	2.2843	42.9792	8.7025	7.3329	6.9594	1.74119	151.94	1.365	1.07	25.4	18.67	3.67	0.5	64.58	7.85	8.56	6.52	0	150	1	0.997	25.1184	20.4572	2.8999	2.8693	48.1146	8.4919	9.09766	6.9501	1.66874	158.732	0.7689
H0240	1.06903	19.2079	19.4344	1.6	2.21787	50.4046	7.6648	7.41352	5.80317	1.46331	136.891	2.04463	1.2501	20.0654	20.846	1.4101	1.7843	54.9192	8.1125	6.8529	5.7394	1.74119	136.94	2.365	0.98	18.2	18.67	2.33	3	32.65	7.7	7.8	5.8	1	130	1	0.977	19.3584	18.7872	1.0599	1.8693	63.6446	7.1819	7.58766	5.8701	1.64874	143.732	2.7689
H0241	0.8957	25.5013	19.9911	0.106667	2.21787	46.6913	7.63813	7.64019	6.36317	1.38998	148.557	1.7113	0.7201	22.7754	18.846	0.0701	2.7843	45.7692	6.7125	6.7129	6.2994	1.57119	121.94	-0.635	1.03	28.36	23	0.01	1.5	39.49	8.47	8.18	6.44	1	170	2	0.937	25.3684	18.1272	0.2399	2.3693	54.8146	7.7319	8.02766	6.3501	1.59874	153.732	3.7689
H0242	0.969033	21.1013	20.2111	0.433333	2.5512	63.3513	7.06147	6.99352	6.0965	1.70998	151.891	0.7113	0.9401	20.6554	20.846	0.0701	2.2843	55.3492	6.8825	5.9029	5.9494	1.57119	126.94	0.365	0.91	21.17	20.33	0.83	2.5	70.1	7.25	7.64	6.24	2	160	1	1.057	21.4784	19.4572	0.3999	2.8693	64.6046	7.0519	7.43766	6.1001	1.55874	168.732	0.7689
H0243	1.2057	25.2513	21.1011	0.776667	2.38453	44.7279	7.41147	8.29352	5.91317	1.45664	143.557	1.37797	1.2701	25.3154	20.846	0.7601	2.7843	44.9092	7.5925	9.7529	6.0294	1.70119	141.94	2.365	1.36	24.98	19.67	0.67	1.5	35.65	6.97	7.36	5.82	1	145	1	0.987	25.4584	22.7872	0.8999	2.8693	53.6246	7.6719	7.76766	5.8901	1.66874	143.732	0.7689
H0244	0.7857	20.5046	19.8777	0.717667	3.21787	54.5546	7.4948	6.82352	5.72317	1.06331	141.891	1.04463	0.6201	20.4854	19.846	0.0831	2.7843	46.6392	7.1825	6.2529	5.6994	1.63119	136.94	1.365	0.72	20.32	19	0.34	3	58.33	7.61	7.2	5.8	0	140	1	1.017	20.7084	20.7872	1.7299	3.8693	58.6946	7.6919	7.01766	5.6701	1.55874	148.732	0.7689
H0246	0.9657	23.8079	20.7677	0.616667	1.38453	54.5346	8.42147	9.11352	6.56983	2.15664	143.557	1.37797	1.0501	24.8854	21.846	0.1101	2.2843	55.5492	9.4325	10.0229	6.7094	1.77119	136.94	2.365	0.91	22.86	21	1.17	1	53.21	7.62	8.37	6.35	3	145	1	0.937	23.6784	19.4572	0.5699	0.8693	54.8446	8.2119	8.94766	6.6501	1.69874	148.732	0.7689
H0247	0.579033	22.8746	18.9911	2.76233	3.38453	48.5613	7.16813	6.36019	5.8265	1.01998	125.224	0.7113	0.7301	19.2154	17.846	2.7271	2.7843	44.6292	6.8225	4.8229	5.7794	1.49119	116.94	0.365	0.03	24.55	18.67	3	3.5	43.28	7.01	6.88	5.75	0	130	0	0.977	24.8584	20.4572	2.5599	3.8693	57.7746	7.6719	7.37766	5.9501	1.56874	128.732	1.7689
H0248	0.552367	24.7979	17.4344	1.26433	0.717867	31.7313	6.44147	6.48019	5.4565	1.03664	101.891	2.7113	0.3101	23.3654	17.846	2.3931	-0.2157	38.9792	6.1825	5.6429	5.2594	1.52119	136.94	1.365	0.48	24.13	14.67	0.34	0.5	2.79	6.14	6.76	5.48	0	70	3	0.867	26.8984	19.7872	1.0599	1.8693	53.4246	7.0019	7.03766	5.6301	1.58874	98.7322	3.7689
H0250	1.3057	26.8279	20.3244	2.31767	2.5512	66.6546	8.36147	7.26019	6.2965	1.46331	151.866	1.7113	1.3501	26.8354	21.846	2.3931	2.7843	75.3392	9.2525	6.2029	6.6294	1.76119	NA	2.365	1.48	28.36	20	2	2	74.51	7.66	7.51	5.94	1	160	1	1.087	25.2884	19.1272	2.5599	2.8693	50.1146	8.1719	8.06766	6.3201	1.62874	143.732	1.7689
H0251	0.909033	24.2046	19.8777	1.98567	1.5512	61.0713	8.13147	7.37019	5.66983	1.51664	148.557	1.7113	1.0501	27.0054	21.846	2.7271	2.2843	61.0292	9.1125	6.8729	5.9594	1.78119	146.94	3.365	0.84	24.13	21.33	0.67	1.5	68.88	7.23	7.45	5.57	1	145	1	0.837	21.4784	16.4572	2.5599	0.8693	53.3046	8.0519	7.78766	5.4801	1.76874	153.732	0.7689
H0252	1.07237	20.0246	22.2111	2.76333	2.5512	50.3179	6.9048	6.36352	4.93983	1.09331	138.557	1.37797	1.0701	16.8454	18.846	2.0601	3.2843	42.8192	6.1325	5.6129	4.7994	1.57119	146.94	3.365	0.99	20.74	25	2.33	2	47.67	7.07	6.68	5	0	130	0	1.157	22.4884	22.7872	3.8999	2.3693	60.4646	7.5119	6.79766	5.0201	1.70874	138.732	0.7689
H0253	0.8657	23.6413	19.8777	1.32667	1.88453	61.3279	6.74147	6.50685	5.62983	1.66664	148.557	1.37797	0.7801	23.0254	17.846	1.4101	2.7843	65.5392	6.9225	5.7329	5.6494	1.49119	141.94	-0.635	0.93	23.71	21	0.34	1.5	59.86	6.13	6.77	5.46	2	150	2	0.887	24.1884	20.7872	2.2299	1.3693	58.5846	7.1719	7.01766	5.7801	1.50874	153.732	2.7689
H0254	1.09903	26.4313	18.4344	3.541	1.0512	47.0379	9.0648	8.30019	6.13317	1.53331	138.557	1.04463	0.9301	23.1954	16.846	3.3931	1.7843	49.7292	8.7325	7.3629	5.9994	1.72119	121.94	2.365	1.22	25.82	19.33	3.33	0.5	39.13	8.26	8.09	6.03	1	145	0	1.147	30.2784	19.1272	3.8999	0.8693	52.2546	10.2019	9.44766	6.3701	1.87874	148.732	0.7689
H0255	1.2657	24.0913	19.7677	2.651	3.21787	77.0846	9.53813	9.49685	6.2565	1.46331	151.891	1.7113	1.4001	23.8754	20.846	2.3931	3.2843	67.7192	11.6925	12.5129	6.3694	1.79119	136.94	2.365	1.17	23.11	18	3.33	3	80.53	8.63	7.84	5.98	1	160	1	1.227	25.2884	20.4572	2.2299	3.3693	83.0046	8.2919	8.13766	6.4201	1.59874	158.732	1.7689
H0256	1.2457	27.1379	20.8811	1.32667	2.38453	72.7246	9.1348	8.14352	6.5665	1.71664	145.224	1.37797	1.1501	25.0554	17.846	1.4101	2.7843	69.4492	8.6525	6.9329	6.5294	1.71119	141.94	1.365	1.43	27.09	24.67	1.17	2.5	87.52	8.53	8.45	6.46	1.71	145	0	1.157	29.2684	20.1272	1.3999	1.8693	61.2046	10.2219	9.04766	6.7101	1.72874	148.732	2.7689
H0289	1.09237	28.2379	22.7677	0.216667	2.5512	65.4613	6.56813	6.59019	5.71983	1.55664	141.891	1.7113	1.1101	27.4254	23.846	0.0701	2.7843	42.7592	7.5225	6.5829	6.0394	1.59119	141.94	3.365	1.14	28.79	22.33	0.34	2.5	91.26	6.63	6.98	5.75	1.59	130	1	1.027	28.4984	22.1272	0.2399	2.3693	62.3646	5.5519	6.20766	5.3701	1.48874	153.732	0.7689
H0290	0.442367	24.9079	17.6577	0.34	0.5512	25.8813	3.85813	5.48352	5.00983	1.40331	130.224	1.37797	0.0601	21.9254	15.846	0.1101	0.7843	36.2292	3.3625	5.7029	5.1394	1.32119	146.94	2.365	0.43	25.82	15.67	0.67	0	2.75	3.66	5.27	4.95	1.44	100	1	0.837	26.9784	21.4572	0.2399	0.8693	38.6646	4.5519	5.47766	4.9401	1.44874	143.732	0.7689
H0291	0.7257	16.1746	14.5444	0.78	2.21787	42.7946	8.15147	7.12685	6.06983	1.61664	135.224	0.377967	0.0701	6.5554	6.846	0.1101	3.7843	57.5192	8.1625	5.4129	5.9294	1.50119	146.94	-0.635	1.22	21	20.33	1.33	1.5	27.76	8.38	8.02	6.1	1.72	110	0	0.887	20.9684	16.4572	0.8999	1.3693	43.1046	7.9119	7.94766	6.1801	1.62874	148.732	1.7689
H0293	0.9857	26.1779	21.3244	2.15333	2.38453	69.9313	7.28147	7.24019	5.92317	1.61331	133.557	1.7113	0.6901	25.7354	20.846	2.0601	2.7843	105.739	7.4925	6.0629	5.6194	1.54119	136.94	-0.635	1.09	27.09	20.67	3	2	45.74	7.83	8.26	6.17	1.74	130	3	1.177	25.7084	22.4572	1.3999	2.3693	58.3146	6.5219	7.39766	5.9801	1.55874	133.732	2.7689
H0294	1.44237	30.0179	19.8777	0.222333	2.21787	73.5213	8.32147	7.29685	6.14983	1.64331	150.224	2.04463	1.5501	29.9654	22.846	0.0971	2.7843	76.5292	9.0225	6.0029	6.2694	1.60119	166.94	2.365	1.42	31.33	19.33	0.17	2.5	89.08	8.44	8.28	6.2	1.73	145	1	1.357	28.7584	17.4572	0.3999	1.3693	54.9546	7.5019	7.60766	5.9801	1.59874	138.732	2.7689
H0295	0.842367	25.6146	20.7677	1.88	1.38453	53.9613	7.13147	7.38019	5.17317	1.63998	143.557	1.37797	0.4801	25.7354	19.846	1.4101	1.7843	72.3492	7.0125	7.1429	4.5794	1.40119	156.94	2.365	0.96	25.82	22	3.33	1.5	31.94	6.45	7.24	5.53	1.72	125	1	1.087	25.2884	20.4572	0.8999	0.8693	57.5946	7.9319	7.75766	5.4101	1.79874	148.732	0.7689
H0298	0.8557	24.3446	19.1011	0.61	2.38453	47.6446	7.9148	6.92352	5.63317	1.59998	140.224	0.377967	0.6701	24.0454	19.846	0.7601	2.7843	43.9092	8.2425	6.0929	5.4294	1.51119	146.94	-0.635	0.95	24.72	18.33	0.5	3	46.24	8.2	7.6	5.77	1.73	140	2	0.947	24.2684	19.1272	0.5699	1.3693	52.7846	7.3019	7.07766	5.7001	1.55874	133.732	-0.2311
H0300	0.892367	22.0579	20.4344	0.607667	3.5512	52.6146	7.57813	6.41352	5.4665	1.54664	116.891	1.04463	0.8001	21.0754	19.846	0.0831	3.2843	68.1192	7.4425	5.4829	5.2394	1.46119	131.94	0.365	0.8	22.86	21.67	1.17	4	49.28	7.19	6.73	5.4	1.64	115	2	1.077	22.2384	19.7872	0.5699	3.3693	40.4446	8.1019	7.02766	5.7601	1.53874	103.732	0.7689
H0301	0.829033	23.0179	19.8777	0.274333	2.88453	54.1579	6.1548	6.23019	5.7965	1.43664	141.891	0.7113	0.6801	21.5054	19.846	0.0831	2.7843	48.8092	6.1025	5.7729	5.8394	1.37119	131.94	1.365	0.88	24.13	19.33	0.34	3.5	56.95	6.12	6.62	5.8	1.53	140	1	0.927	23.4184	20.4572	0.3999	2.3693	56.7146	6.2419	6.29766	5.7501	1.40874	153.732	-0.2311
H0302	0.932367	21.4679	20.2111	0.169	2.71787	53.3313	6.3548	5.93352	5.1465	1.53664	146.891	1.37797	0.9901	25.3154	20.846	0.0971	2.7843	41.6692	6.6625	5.6129	5.2694	1.52119	141.94	2.365	0.82	15.24	20	0.17	2.5	60.08	5.84	5.96	5.02	1.57	155	1	0.987	23.8484	19.7872	0.2399	2.8693	58.2446	6.5619	6.22766	5.1501	1.51874	143.732	0.7689
H0304	0.672367	17.9946	17.5444	0.437667	2.88453	52.6213	7.89147	6.93685	5.45983	1.64998	136.891	0.377967	0.2101	11.7654	13.846	0.0831	2.7843	38.1692	7.4525	6.2329	5.2794	1.57119	131.94	-0.635	0.86	19.73	18.33	0.17	3	44.99	7.87	7.19	5.54	1.71	125	1	0.947	22.4884	20.4572	1.0599	2.8693	74.7046	8.3519	7.38766	5.5601	1.66874	153.732	0.7689
H0309	1.03903	28.2079	22.5477	1.04667	2.71787	41.0213	7.35813	8.80019	5.8665	1.73664	141.891	1.37797	0.6601	23.6154	17.846	1.4101	3.7843	39.5792	7.0025	10.7029	6.0394	1.70119	116.94	-0.635	1.16	30.56	25.67	1.33	3.5	33.12	7.69	7.92	5.88	1.76	150	2	1.297	30.4484	24.1272	0.3999	0.8693	50.3646	7.3819	7.77766	5.6801	1.74874	158.732	2.7689
H0310	0.722367	24.5713	18.8811	2.26333	2.38453	52.3479	7.67813	7.36352	5.50317	1.69998	138.557	1.04463	0.5601	21.5054	15.846	3.0601	2.7843	56.7092	7.7525	6.7229	5.3094	1.58119	131.94	1.365	0.8	25.82	22.67	2.33	0.5	60.66	6.95	7.03	5.37	1.71	140	1	0.807	26.3884	18.1272	1.3999	3.8693	39.6746	8.3319	8.33766	5.8301	1.80874	143.732	0.7689
H0311	0.922367	22.9046	18.8811	0.16	3.21787	55.8546	8.04813	6.86352	5.79983	1.60998	141.891	1.04463	0.8701	21.0754	18.846	0.0701	2.7843	48.7292	8.6525	5.9829	5.7994	1.54119	136.94	-0.635	0.86	23.71	20.67	0.01	3.5	42.27	7.42	7.11	5.66	1.67	140	2	1.037	23.9284	17.1272	0.3999	3.3693	76.5646	8.0719	7.49766	5.9401	1.61874	148.732	1.7689
H0312	0.682367	21.9179	18.5444	2.54333	1.21787	34.5479	9.01147	7.59019	5.6365	1.82331	126.891	1.37797	0.3701	19.3854	16.846	3.0601	0.7843	38.0392	8.9625	6.0429	5.4094	1.74119	131.94	0.365	0.87	23.71	21	2.67	1	28.73	9.83	8.49	5.71	1.93	125	2	0.807	22.6584	17.7872	1.8999	1.8693	36.8746	8.2419	8.23766	5.7901	1.79874	123.732	1.7689
H0313	1.03903	20.8179	23.6544	1.55333	2.38453	61.8179	6.25147	7.11019	5.4865	1.58998	155.224	0.377967	0.7701	17.6954	24.846	0.7601	2.7843	58.4592	5.6125	7.0129	5.2494	1.48119	151.94	-0.635	1.12	21.17	23.33	3	2.5	64.68	5.92	6.72	5.44	1.63	150	1	1.227	23.5884	22.7872	0.8999	1.8693	62.3146	7.2219	7.59766	5.7701	1.65874	163.732	0.7689
H0315	1.1457	26.2079	22.5444	0.5	2.38453	63.5413	8.01813	7.45685	6.22317	1.70331	161.891	1.7113	1.1701	23.4454	20.846	0.7601	2.7843	70.9192	9.2725	7.5929	6.8494	1.87119	171.94	-0.635	1.02	26.25	23	0.34	2.5	57.78	7.42	7.43	5.91	1.66	155	3	1.247	28.9284	23.7872	0.3999	1.8693	61.9246	7.3619	7.34766	5.9101	1.57874	158.732	2.7689
H0316	1.1457	25.0213	22.9877	1.159	2.38453	78.2446	7.70813	6.89019	5.91317	1.61998	165.224	1.7113	1.0901	23.1954	22.846	0.7471	2.2843	53.3192	7.7525	5.8629	5.9494	1.60119	161.94	1.365	1.22	24.13	23.33	1.33	2.5	95	7.87	7.56	5.87	1.68	170	1	1.127	27.7384	22.7872	1.3999	2.3693	86.4146	7.5019	7.24766	5.9201	1.57874	163.732	2.7689
H0321	1.29237	28.8046	22.3211	2.76567	2.71787	63.8879	6.82813	6.42685	4.77983	1.68664	145.224	0.377967	1.3101	27.8554	18.846	2.7271	2.7843	50.3192	6.5725	6.4929	4.6694	1.66119	126.94	-0.635	1.31	29.46	23.33	2.67	2.5	84.38	7	6.39	4.86	1.72	145	1	1.257	29.0984	24.7872	2.8999	2.8693	56.9646	6.9119	6.39766	4.8101	1.67874	163.732	0.7689
H0322	1.33237	25.5579	21.4344	1.99	2.5512	37.0946	8.09813	7.07019	5.18983	1.66664	125.224	1.37797	1.2601	28.2754	20.846	0.0701	2.7843	45.5092	7.5425	7.0829	4.9794	1.54119	111.94	2.365	1.41	22.86	20.67	2.67	3	17.58	8.34	7.07	5.32	1.76	120	1	1.327	25.5384	22.7872	3.2299	1.8693	48.1946	8.4119	7.05766	5.2701	1.69874	143.732	0.7689
H0323	1.00903	24.1746	22.2111	0.38	2.71787	60.9379	6.5848	8.01685	5.41317	1.65331	148.557	0.377967	0.8801	23.6154	21.846	0.0701	2.7843	53.0092	6.1825	10.2529	5.4094	1.67119	131.94	0.365	1.05	24.47	22	0.17	2.5	70.04	6.78	6.98	5.45	1.68	150	0	1.097	24.4384	22.7872	0.8999	2.8693	59.7646	6.7919	6.81766	5.3801	1.60874	163.732	0.7689
H0324	1.1857	24.5413	20.4344	0.49	2.5512	60.5179	7.51147	6.84352	5.63317	1.57998	145.224	0.7113	0.8801	21.0754	18.846	0.0701	2.2843	52.4492	7.9525	6.4729	5.6994	1.51119	126.94	-0.635	1.28	26.67	21	0.5	2.5	64.68	6.95	6.97	5.56	1.64	150	2	1.397	25.8784	21.4572	0.8999	2.8693	64.4246	7.6319	7.08766	5.6401	1.58874	158.732	0.7689
H0325	1.1857	20.2813	18.9877	0.78	2.5512	54.2579	8.2048	6.94685	5.55983	1.74664	133.557	0.7113	1.1401	16.6754	18.846	0.1101	2.2843	51.6292	7.7225	5.2629	5.5294	1.64119	156.94	0.365	1.22	21.76	18.33	1.33	2.5	68.32	8.75	7.65	5.52	1.82	125	1	1.197	22.4084	19.7872	0.8999	2.8693	42.8246	8.1419	7.92766	5.6301	1.77874	118.732	0.7689
H0329	1.2557	27.1946	21.3211	0.221	3.38453	57.6279	7.9748	7.69352	5.8965	1.69331	131.891	2.37797	1.6301	31.6654	24.846	0.0831	2.7843	69.3492	8.6225	8.1729	6.1594	1.75119	141.94	3.365	1.16	26.67	21.33	0.01	4	60.78	7.49	7.38	5.66	1.71	130	1	0.977	23.2484	17.7872	0.5699	3.3693	42.7546	7.8119	7.52766	5.8701	1.61874	123.732	2.7689
H0330	1.16237	23.9779	21.7677	0.67	3.38453	55.6646	9.4748	10.0702	7.0965	1.77664	138.557	1.37797	1.2901	22.4354	21.846	0.1101	2.7843	70.0892	9.6025	11.0629	7.3694	1.78119	141.94	1.365	1.02	25.4	21	0.5	4	46.58	9.84	9.75	7.05	1.81	130	1	1.177	24.0984	22.4572	1.3999	3.3693	50.3246	8.9819	9.39766	6.8701	1.73874	143.732	1.7689
H0331	1.06903	28.7479	21.3244	0.27	2.5512	66.1746	8.10125	6.99145	6.2097	1.61559	158.557	1.7113	1.1801	27.2554	18.846	0.0701	2.2843	74.9892	8.4125	6.3229	6.2294	1.60119	171.94	3.365	1.01	30.06	21.67	0.34	2.5	73.22	7.79	7.66	6.19	1.63	155	1	1.017	28.9284	23.4572	0.3999	2.8693	50.3146	NA	NA	NA	NA	148.732	0.7689
H0334	0.782367	24.6546	19.5444	0.884333	2.68465	45.7113	7.3248	6.58352	5.91317	1.61998	143.557	1.37797	0.4901	21.2454	17.846	0.0831	NA	41.1992	6.8625	4.9029	6.2194	1.55119	146.94	-0.635	0.81	26.33	20	0.17	3	29.08	7.26	7.36	5.88	1.65	130	2	1.047	26.3884	20.7872	2.3999	2.3693	66.8546	7.8519	7.48766	5.6401	1.65874	153.732	2.7689
H0335	1.0657	24.9646	21.5444	1.66	1.5512	82.2479	7.42813	6.35685	5.26317	1.67331	136.891	2.04463	1.2601	26.1554	22.846	1.4101	2.2843	94.6992	8.8725	5.6429	5.3694	1.70119	131.94	3.365	0.93	23.28	19	2.67	1.5	59.7	6.91	6.9	5.32	1.7	130	1	1.007	25.4584	22.7872	0.8999	0.8693	92.3446	6.5019	6.52766	5.1001	1.61874	148.732	1.7689
H0336	0.919033	20.7913	20.9911	0.389	2.38453	71.7246	7.8448	6.79352	5.5865	1.60998	148.557	0.377967	0.8301	22.7754	23.846	0.0971	1.7843	48.0792	8.0925	6.0529	5.5494	1.55119	146.94	-0.635	0.94	19.05	19	0.67	2.5	72.57	7.89	7.3	5.7	1.68	145	1	0.987	20.5484	20.1272	0.3999	2.8693	94.5246	7.5519	7.02766	5.5101	1.59874	153.732	0.7689
H0337	1.01903	22.9613	21.6544	0.217667	3.0512	64.7246	6.7048	5.90352	5.1365	1.59331	141.891	0.7113	0.9201	24.8854	23.846	0.0831	2.7843	63.5992	6.9625	5.0629	5.2294	1.57119	131.94	0.365	0.91	21	19.33	0.17	3.5	53.23	6.37	6.4	5.12	1.65	135	1	1.227	22.9984	21.7872	0.3999	2.8693	77.3446	6.7819	6.24766	5.0601	1.55874	158.732	0.7689
H0339	1.1457	26.6046	22.9911	0.331	1.5512	69.2313	7.59147	7.61019	5.4465	1.71331	145.224	1.7113	1.1901	24.0454	20.846	0.0831	1.7843	56.5392	6.8725	7.4429	5.2794	1.57119	126.94	-0.635	0.94	26.67	23.67	0.34	1.5	62.48	8.18	7.74	5.47	1.85	150	2	1.307	29.0984	24.4572	0.5699	1.3693	88.6746	7.7219	7.64766	5.5901	1.71874	158.732	3.7689
H0340	1.0457	22.8479	22.1011	2.15667	2.0512	64.0746	7.1748	6.79019	5.86983	1.59664	146.891	1.7113	1.0301	19.8054	22.846	1.4101	2.2843	78.3592	7.4625	5.8329	6.0894	1.52119	156.94	3.365	0.92	23.71	22.33	3.33	2	49.28	6.97	7.19	5.75	1.64	140	1	1.187	25.0284	21.1272	1.7299	1.8693	64.5846	7.0919	7.34766	5.7701	1.62874	143.732	0.7689
H0341	0.929033	21.0979	21.5444	0.433333	2.71787	60.0346	6.46813	6.80352	5.37317	1.52664	146.891	1.7113	0.8401	19.3854	20.846	0.0701	1.7843	56.8492	6.3625	8.0329	5.5394	1.55119	161.94	-0.635	0.92	20.74	22	0.17	3.5	47.75	6.88	6.62	5.42	1.61	130	2	1.027	23.1684	21.7872	1.0599	2.8693	75.5046	6.1619	5.75766	5.1601	1.41874	148.732	3.7689
H0342	1.0157	24.4279	19.3244	1.541	1.5512	74.2979	7.64813	7.37019	5.6465	1.77331	165.224	1.7113	1.0301	22.7754	18.846	2.3931	1.7843	89.4292	7.2325	6.7729	5.6894	1.81119	166.94	0.365	0.94	24.55	16.67	1.17	1	63	7.99	7.67	5.58	1.8	155	2	1.077	25.9584	22.4572	1.0599	1.8693	70.4646	7.7219	7.66766	5.6701	1.70874	173.732	2.7689
H0343	1.3657	25.1346	23.5477	0.78	3.0512	68.7613	7.31813	6.88685	5.76983	1.60331	160.224	1.7113	1.4601	25.8154	24.846	0.1101	2.7843	61.5992	6.7925	5.9529	5.6694	1.55119	146.94	0.365	1.27	24.13	23.67	1.33	3	70.16	7.83	7.73	5.96	1.7	160	2	1.367	25.4584	22.1272	0.8999	3.3693	74.5246	7.3319	6.97766	5.6801	1.55874	173.732	2.7689
H0344	0.809033	24.6546	21.6544	0.16	2.71787	53.4246	6.01147	6.08019	5.50317	1.48331	140.224	1.04463	0.8901	24.8054	23.846	0.0701	3.2843	74.0292	5.4925	5.2329	5.2494	1.42119	141.94	1.365	0.68	25.82	20.33	0.01	1.5	38.19	5.84	6.39	5.57	1.54	135	2	0.857	23.3384	20.7872	0.3999	3.3693	48.0546	6.7019	6.61766	5.6901	1.48874	143.732	-0.2311
H0345	1.11903	23.5846	19.8811	1.32433	1.71787	59.0179	8.11147	8.10352	5.72983	1.71998	146.891	1.37797	1.3001	25.3154	22.846	1.7431	1.7843	71.5892	8.7525	8.9729	5.7494	1.72119	131.94	3.365	1.16	23.54	19.67	0.83	1.5	62.55	7.6	7.62	5.74	1.73	150	1	0.897	21.8984	17.1272	1.3999	1.8693	42.9146	7.9819	7.71766	5.7001	1.70874	158.732	-0.2311
H0346	1.0857	23.1313	22.7677	0.503333	3.21787	58.4079	8.3948	6.84352	6.00983	1.59664	148.557	0.377967	1.0901	22.3454	20.846	0.1101	3.2843	54.0192	9.1025	5.7129	6.0594	1.57119	141.94	0.365	1.07	24.13	22.67	0.67	3.5	50.23	8.38	7.64	6.02	1.68	140	1	1.097	22.9184	24.7872	0.7299	2.8693	70.9746	7.7019	7.17766	5.9501	1.53874	163.732	-0.2311
H0347	0.949033	26.0646	20.9911	1.59667	3.21787	57.7213	6.3148	6.27685	5.3465	1.61331	128.557	1.37797	0.9701	25.2254	22.846	2.0601	2.7843	49.7092	5.7725	5.7329	5.3694	1.63119	111.94	2.365	0.98	24.55	19.67	1.17	3	56.48	6.74	6.6	5.32	1.66	120	1	0.897	28.4184	20.4572	1.5599	3.8693	66.9746	6.4319	6.49766	5.3501	1.54874	153.732	0.7689
H0348	0.889033	26.4346	22.8777	1.44333	2.5512	93.5946	7.89147	7.63019	5.86317	1.73331	138.557	1.37797	0.4901	25.7354	21.846	0.7601	1.7843	50.5092	6.3125	5.8729	5.5094	1.58119	121.94	1.365	1.21	27.86	23	2.67	2.5	148.46	9.01	8.75	6.06	1.88	135	1	0.967	25.7084	23.7872	0.8999	3.3693	81.8146	8.3519	8.26766	6.0201	1.73874	158.732	1.7689
H0349	0.912367	22.8779	22.8777	0.441	3.21787	54.6346	6.12147	6.38352	5.17317	1.49331	126.891	1.7113	0.9301	22.3454	24.846	0.0831	2.7843	61.8492	6.1025	6.9529	5.0894	1.42119	141.94	2.365	0.93	21	23.33	0.01	3	52.03	6.34	6.38	5.32	1.61	105	2	0.877	25.2884	20.4572	1.2299	3.8693	50.0246	5.9219	5.81766	5.1101	1.44874	133.732	0.7689
H0350	1.0557	25.6713	21.5444	1.98567	3.21787	68.0646	8.4648	6.99685	5.8365	1.69331	141.891	2.37797	1.1601	26.5854	22.846	2.7271	2.7843	55.3292	8.0625	5.5429	5.7194	1.62119	146.94	2.365	0.93	24.55	21	2.33	3	76.72	9.38	7.89	5.87	1.8	130	2	1.077	25.8784	20.7872	0.8999	3.8693	72.1446	7.9519	7.55766	5.9201	1.65874	148.732	2.7689
H0351	1.17903	23.7513	19.2111	0.274333	3.21787	51.1579	8.72813	7.22352	5.93983	1.62664	123.557	1.04463	1.3001	23.9554	20.846	0.0831	3.2843	45.6092	8.6625	6.0329	5.8094	1.52119	131.94	1.365	1.01	23.03	17.33	0.17	3	53.29	7.94	7.48	5.88	1.67	110	1	1.227	24.2684	19.4572	0.5699	3.3693	54.5746	9.5819	8.15766	6.1301	1.68874	128.732	0.7689
H0352	1.26903	26.0646	24.5444	0.38	2.5512	68.7079	7.23147	6.32685	5.07317	1.64664	130.224	2.04463	1.5401	26.8354	25.846	0.0701	2.7843	78.3292	8.1125	6.4029	5.1694	1.71119	136.94	3.365	1.19	25.06	24.33	0.17	3	76.08	6.85	6.33	5.05	1.65	120	1	1.077	26.2984	23.4572	0.8999	1.8693	51.7146	6.7319	6.24766	5.0001	1.57874	133.732	1.7689
H0353	1.01237	23.7779	22.5444	1.44667	2.38453	67.0279	6.30813	6.42019	5.3065	1.58331	143.557	1.04463	1.1701	24.8854	22.846	0.1101	2.7843	79.6892	6.3625	6.5329	5.2494	1.62119	141.94	2.365	0.8	23.28	20.33	1.33	2	54.84	5.81	6.07	5.21	1.55	135	1	1.067	23.1684	24.4572	2.8999	2.3693	66.5546	6.7519	6.65766	5.4601	1.57874	153.732	-0.2311
H0354	0.9257	26.2379	19.3244	0.16	3.0512	58.1713	8.22813	6.95352	6.0765	1.71331	148.557	2.04463	0.8201	25.3154	17.846	0.0701	2.7843	50.7392	8.7425	5.5929	6.4394	1.78119	131.94	1.365	0.97	26.67	19.67	0.01	3.5	61.62	8.58	7.95	6	1.74	150	2	0.987	26.7284	20.4572	0.3999	2.8693	62.1546	7.3619	7.31766	5.7901	1.61874	163.732	2.7689
H0356	1.28903	25.7279	22.6544	1.49667	1.71787	65.2179	6.3648	8.31685	5.33983	1.60331	138.557	1.04463	1.6101	29.5454	23.846	0.7601	1.7843	68.3292	6.6325	11.4429	5.2094	1.59119	136.94	2.365	1.3	25.4	21.33	1.67	1.5	72.52	6.38	6.71	5.39	1.63	135	1	0.957	22.2384	22.7872	2.0599	1.8693	54.8046	6.0819	6.79766	5.4201	1.58874	143.732	-0.2311
H0357	1.18903	23.8913	20.6577	0.213333	3.0512	50.2879	8.73625	7.11645	5.8647	1.9006	144.366	1.7113	1.5201	23.9554	19.846	0.0701	2.7843	66.0192	8.7125	6.1429	5.8994	1.97119	NA	-0.635	1	22.01	18.67	0.17	3	48.15	8.76	8.09	5.83	1.83	145	3	1.047	25.7084	23.4572	0.3999	3.3693	36.6946	NA	NA	NA	NA	143.732	2.7689
H0358	0.779033	19.8579	20.6577	0.499	2.71787	50.4113	6.90813	5.98685	5.05317	1.56664	130.224	0.377967	0.4601	16.8454	16.846	0.0971	2.7843	39.6592	6.1425	4.8429	4.7594	1.41119	146.94	0.365	0.79	22.1	20	0.34	3	47.05	7.43	6.61	5.16	1.7	110	1	1.087	20.6284	25.1272	1.0599	2.3693	64.5246	7.1519	6.50766	5.2401	1.58874	133.732	-0.2311
H0359	1.03237	22.3379	23.2144	0.111	3.0512	52.2713	5.62147	7.33685	4.55983	1.69998	120.224	1.37797	1.1101	22.6854	23.846	0.0831	2.2843	53.9092	4.4625	9.6229	4.3194	1.66119	106.94	-0.635	0.79	23.11	22.67	0.01	3.5	43.27	6.11	6.3	4.67	1.78	125	3	1.197	21.2184	23.1272	0.2399	3.3693	59.6346	6.2919	6.08766	4.6901	1.65874	128.732	1.7689
H0360	1.07903	20.5346	15.4344	0.49	1.5512	64.7079	8.6848	7.21019	5.49983	1.82998	148.557	1.04463	1.1401	18.1154	14.846	0.0701	1.7843	68.2592	9.2125	5.6829	5.2794	1.81119	146.94	1.365	1.01	21.84	16.33	0.34	1.5	62.11	8.12	7.73	5.53	1.84	155	1	1.087	21.6484	15.1272	1.0599	1.3693	63.7546	8.7219	8.21766	5.6901	1.83874	143.732	0.7689
H0361	1.26903	26.5179	18.8811	2.37433	0.384533	99.3179	8.6048	8.66352	5.39983	1.74331	145.224	1.7113	1.4001	26.1554	17.846	2.3931	0.7843	93.2892	9.8425	10.9329	5.3094	1.71119	141.94	0.365	1.15	27.52	17.67	1.17	0	103.52	7.82	7.18	5.31	1.76	145	2	1.257	25.8784	21.1272	3.5599	0.3693	101.145	8.1519	7.87766	5.5801	1.75874	148.732	2.7689
H0362	0.882367	26.3779	22.4344	0.616667	2.38453	36.6746	6.6148	7.33352	6.07983	1.64998	128.557	1.7113	0.8101	26.6654	20.846	0.1101	2.7843	41.6392	5.2025	6.6229	6.2094	1.62119	156.94	0.365	0.78	25.91	21.67	0.84	2.5	24.14	7.39	7.55	5.94	1.68	115	2	1.057	26.5584	24.7872	0.8999	1.8693	44.2446	7.2519	7.82766	6.0901	1.64874	113.732	2.7689
H0363	1.05237	23.8346	18.8777	2.32	0.5512	64.4713	9.70147	9.19352	5.9365	1.84998	136.891	1.04463	1.1601	23.6154	18.846	3.0601	0.7843	60.0892	11.5625	11.1829	6.0794	1.90119	136.94	1.365	0.89	23.62	20	1.67	0	72.71	8.58	7.56	5.47	1.84	135	1	1.107	24.2684	17.7872	2.2299	0.8693	60.6146	8.9619	8.83766	6.2601	1.80874	138.732	0.7689
H0364	0.8557	23.4413	18.8777	0.67	1.71787	62.6046	7.34813	7.02685	6.0665	1.63998	155.224	0.7113	0.7901	21.9254	16.846	0.1101	2.7843	52.3692	7.3825	5.8629	6.3094	1.65119	151.94	2.365	0.9	25.15	20	0.83	1.5	70.08	7.21	7.43	5.86	1.65	155	0	0.877	23.2484	19.7872	1.0699	0.8693	65.3646	7.4519	7.78766	6.0301	1.61874	158.732	-0.2311
H0365	1.3457	24.0079	21.8777	2.54333	0.717867	89.2213	7.49813	7.73883	5.38005	1.85437	141.891	0.7113	1.3801	21.5054	20.846	2.0601	0.7843	64.6292	7.2625	NA	NA	NA	126.94	0.365	1.29	25.4	22.33	2.67	0.5	84.38	7.46	7.86	5.59	1.86	145	1	1.367	25.1184	22.4572	2.8999	0.8693	118.655	7.7719	7.61766	5.1701	1.84874	153.732	0.7689
H0366	1.28237	27.4479	20.9877	1.77667	1.38453	60.6779	9.22147	8.72352	5.99983	1.90331	141.866	1.04463	1.7001	30.1354	22.846	0.7601	1.2843	47.1892	8.8225	8.2829	5.8594	1.92119	NA	-0.635	0.87	26.08	20.33	1.67	2	52.68	9.87	8.94	6.15	1.9	140	2	1.277	26.1284	19.7872	2.8999	0.8693	82.1646	8.9719	8.94766	5.9901	1.88874	143.732	1.7689
H0367	0.972367	21.9746	23.4344	1.27333	1.71787	59.5379	6.7548	6.66685	5.27983	1.66664	143.557	1.7113	0.7301	16.8454	21.846	0.7601	2.7843	38.7392	6.2025	5.7629	5.1894	1.57119	126.94	-0.635	1.07	25.4	23.67	2	1	66.63	8.17	7.67	5.56	1.8	150	3	1.117	23.6784	24.7872	1.0599	1.3693	73.2446	5.8919	6.56766	5.0901	1.62874	153.732	2.7689
H0369	1.22903	24.5146	20.3244	1.431	2.88453	59.2013	10.1615	8.38019	6.58983	1.76331	131.891	1.7113	1.4501	23.7854	17.846	2.3931	3.2843	52.2492	9.6325	6.4829	6.6494	1.61119	111.94	-0.635	0.85	22.86	20	0.5	3	46.28	10.56	9.42	6.6	1.88	135	3	1.387	26.8984	23.1272	1.3999	2.3693	79.0746	10.2919	9.23766	6.5201	1.79874	148.732	2.7689
H0370	0.789033	21.3279	18.1011	1.43667	0.384533	55.8979	7.88813	7.40685	5.0665	1.76998	138.557	0.7113	0.7101	19.1354	15.846	1.4101	0.7843	42.4392	7.8525	6.3229	4.4194	1.52119	116.94	-0.635	0.84	23.71	19.33	1.67	0	52.83	8.44	8.19	5.5	1.95	150	1	0.817	21.1384	19.1272	1.2299	0.3693	72.4246	7.3719	7.70766	5.2801	1.83874	148.732	1.7689
H0372	0.809033	21.2413	19.5444	0.66	3.0512	32.1046	7.98813	7.63685	5.27983	1.74664	121.891	2.37797	0.9001	22.0954	21.846	1.4101	2.7843	37.8692	7.3025	8.3329	4.9694	1.75119	126.94	1.365	0.72	22.78	22	0.17	4	22.28	9.21	7.52	5.44	1.83	120	2	0.807	18.8484	14.7872	0.3999	2.3693	36.1646	7.4519	7.05766	5.4301	1.65874	118.732	3.7689
H0373	0.812367	29.8513	19.4344	0.226667	3.0512	51.0779	9.88813	7.97019	6.34983	1.75331	146.891	0.7113	0.6801	27.8554	18.846	0.1101	3.2843	43.5292	9.9325	6.3329	6.2294	1.73119	151.94	0.365	0.77	31.33	18.33	0.17	3.5	44.25	10.07	8.82	6.38	1.82	145	1	0.987	30.3684	21.1272	0.3999	2.3693	65.4546	9.6619	8.75766	6.4401	1.70874	143.732	0.7689
H0374	1.19237	22.5113	19.7677	0.56	3.38453	56.7879	8.4848	7.92352	5.75983	1.77664	128.557	1.37797	1.4901	24.8854	23.846	0.1101	2.7843	51.2792	8.3625	7.9729	5.5994	1.82119	131.94	0.365	1.13	21.51	20	0.34	4	77.68	9.37	7.96	5.85	1.79	140	1	0.957	21.1384	15.4572	1.2299	3.3693	41.4046	7.7219	7.83766	5.8301	1.71874	113.732	2.7689
H0375	0.979033	24.7146	18.4344	2.32	2.88453	53.3846	7.7448	8.30019	5.83983	1.67998	138.557	1.37797	1.0701	24.0454	17.846	2.0601	2.7843	56.0092	8.2725	9.3329	5.6894	1.63119	116.94	1.365	0.91	24.47	19.33	2	3	60.43	7.34	7.53	5.87	1.69	155	1	0.957	25.6284	18.1272	2.8999	2.8693	43.7146	7.6219	8.03766	5.9601	1.71874	143.732	1.7689
H0376	1.10903	25.3313	19.3244	0.943333	2.0512	61.5979	8.26813	7.76019	6.39983	1.66998	141.891	1.37797	1.3901	28.2754	19.846	0.7601	2.7843	70.0092	9.1025	6.6429	6.6694	1.62119	151.94	2.365	1	23.79	18.67	0.34	2	61.07	7.79	8.18	6.3	1.69	135	1	0.937	23.9284	19.4572	1.7299	1.3693	53.7146	7.9119	8.45766	6.2301	1.69874	138.732	0.7689
H0377	0.859033	25.1646	18.9911	0.886667	3.38453	46.2446	7.7548	6.93019	6.18983	1.52664	140.224	2.37797	0.9101	27.6854	19.846	0.7601	2.7843	45.6392	7.8325	6.1029	6.2094	1.47119	151.94	3.365	0.91	24.13	19	1.33	3	47.32	8.37	7.85	6.37	1.63	130	2	0.757	23.6784	18.1272	0.5699	4.3693	45.7746	7.0619	6.83766	5.9901	1.47874	138.732	1.7689
H0378	0.812367	25.3646	21.1011	1.66333	2.38453	33.8913	8.89813	9.13019	6.43983	1.79331	125.224	1.04463	0.5701	22.7754	19.846	0.7601	2.2843	35.8192	4.9825	6.4429	5.1594	1.56119	126.94	1.365	0.99	27.69	21.67	2.33	2.5	23.87	11.68	10.69	7.12	1.96	120	1	0.877	25.6284	21.7872	1.8999	2.3693	41.9846	10.0319	10.2577	7.0401	1.85874	128.732	0.7689
H0379	1.04903	21.9746	19.9911	1.16667	1.88453	64.5346	8.36147	8.10685	5.88317	1.77331	173.557	1.04463	0.9501	23.0254	21.846	0.1101	2.2843	46.7292	7.9025	7.8429	5.7694	1.77119	211.94	1.365	1.32	24.3	22.67	2.33	2	96.08	8.54	8.1	5.9	1.79	165	1	0.877	18.5984	15.4572	1.0599	1.3693	50.7946	8.6419	8.37766	5.9801	1.75874	143.732	0.7689
H0381	1.16903	22.1446	21.7677	1.54667	2.21787	71.7113	8.40147	7.25685	5.7965	1.69664	151.891	1.7113	1.4201	24.3854	21.846	1.4101	2.2843	53.0392	8.8925	7.5829	6.1294	1.78119	146.94	3.365	1.05	20.74	22	2	2.5	81.28	8.07	7.17	5.66	1.69	150	1	1.037	21.3084	21.4572	1.2299	1.8693	80.8146	8.2419	7.01766	5.6001	1.61874	158.732	0.7689
H0382	0.9357	22.3979	19.2144	0.503333	3.88453	51.0179	8.44147	7.04685	6.15317	1.61664	139.366	1.37797	0.9401	24.3854	20.846	0.1101	3.2843	55.4592	8.0425	5.8129	6.2894	1.57119	NA	2.365	1.06	21.76	18.67	0.34	4	50.38	8.54	7.78	6.07	1.69	135	1	0.807	21.0484	18.1272	1.0599	4.3693	47.2146	8.7419	7.54766	6.1001	1.58874	143.732	0.7689
H0383	0.8057	23.1013	19.6544	2.321	3.88453	65.7546	8.47813	6.97352	5.47317	1.69331	141.891	1.37797	0.9201	23.8754	19.846	3.3931	3.2843	75.3492	8.2125	6.1429	5.3894	1.62119	146.94	3.365	0.76	21.84	19.33	0.67	4	67.8	8.16	7.29	5.49	1.75	135	1	0.737	23.5884	19.7872	2.8999	4.3693	54.1146	9.0619	7.48766	5.5401	1.70874	143.732	-0.2311
H0384	0.732367	19.5746	20.1011	2.65333	2.71787	49.6679	7.4148	6.74685	5.6265	1.51998	150.224	0.7113	0.4401	12.4454	19.846	2.0601	1.2843	40.6192	7.0925	5.8729	5.3194	1.34119	136.94	1.365	0.9	22.01	20	2.67	3	55.08	7.66	7.38	5.79	1.67	150	1	0.857	24.2684	20.4572	3.2299	3.8693	53.3046	7.4919	6.98766	5.7701	1.54874	163.732	-0.2311
H0385	1.1857	26.9979	22.4344	0.72	2.0512	85.6513	7.23813	7.03685	5.87317	1.61998	138.557	1.37797	1.5401	29.1254	23.846	0.7601	1.7843	95.1692	7.6525	5.9629	5.8294	1.56119	126.94	-0.635	0.91	25.82	20	0.83	2.5	66.78	7.26	7.83	6.04	1.69	135	2	1.107	26.0484	23.4572	0.5699	1.8693	95.0046	6.8019	7.31766	5.7501	1.60874	153.732	2.7689
H0386	0.832367	22.7079	19.3244	1.32433	1.38453	55.6979	7.22813	6.83019	5.69317	1.54331	143.557	0.7113	0.7201	21.7554	20.846	1.7431	1.7843	57.8592	7.6225	6.7529	5.5894	1.54119	131.94	2.365	0.82	21.51	18	0.83	1	57.9	6.64	6.56	5.62	1.54	145	0	0.957	24.8584	19.1272	1.3999	1.3693	51.3346	7.4219	7.17766	5.8701	1.54874	153.732	-0.2311
H0387	0.6857	20.5879	18.8777	0.213333	1.88453	42.6413	6.47813	6.22685	5.34983	1.51998	150.224	0.0446333	0.4001	19.4654	15.846	0.0701	1.7843	43.6392	6.1425	5.7129	5.3194	1.45119	141.94	0.365	0.86	21.59	20.33	0.17	2	31.56	6.57	6.57	5.38	1.6	150	0	0.797	20.7084	20.4572	0.3999	1.8693	52.7246	6.7219	6.39766	5.3501	1.50874	158.732	-0.2311
H0388	1.20237	24.7413	19.1011	0.16	2.21787	71.3813	7.8548	7.35685	5.83317	1.65664	151.891	1.04463	1.3201	25.5654	19.846	0.0701	2.2843	64.7192	8.4025	6.9429	6.0794	1.59119	156.94	1.365	1.07	23.71	20.33	0.01	2.5	73.69	6.91	7.19	5.61	1.67	140	1	1.217	24.9484	17.1272	0.3999	1.8693	75.7346	8.2519	7.93766	5.8101	1.70874	158.732	0.7689
H0389	1.07237	24.4013	20.9911	1.21	2.88453	67.7179	8.21813	7.68019	5.6265	1.71331	151.891	0.377967	1.1401	24.0454	21.846	2.0601	3.2843	56.7092	8.8725	8.3029	5.7894	1.71119	141.94	-0.635	0.91	24.13	20	0.34	3	73.81	7.79	7.37	5.53	1.76	150	1	1.167	25.0284	21.1272	1.2299	2.3693	72.6346	7.9919	7.36766	5.5601	1.66874	163.732	0.7689
H0390	0.809033	24.3713	21.1011	0.326667	2.38453	43.3213	7.49147	6.70352	5.9165	1.52331	143.557	1.37797	0.6101	24.4654	21.846	0.0701	1.7843	45.7992	7.9125	5.8729	6.0094	1.44119	131.94	2.365	0.94	23.28	23.67	0.34	2.5	46.89	7.05	7.07	5.77	1.61	150	1	0.877	25.3684	17.7872	0.5699	2.8693	37.2746	7.5119	7.16766	5.9701	1.51874	148.732	0.7689
H0391	1.02903	24.7079	20.7677	0.16	3.21787	58.9213	6.47813	7.36352	5.77317	1.55331	130.224	1.04463	1.2401	26.1554	20.846	0.0701	3.2843	64.4992	6.6325	8.8329	6.0094	1.63119	131.94	1.365	0.9	25.82	20.67	0.17	3	36.79	5.83	6.53	5.68	1.52	115	1	0.947	22.1484	20.7872	0.2399	3.3693	75.4746	6.9719	6.72766	5.6301	1.50874	143.732	0.7689
H0392	1.24237	25.9546	22.8811	0.772333	2.38453	71.5713	7.83813	6.77352	5.67983	1.60664	146.891	1.04463	1.3501	27.1754	21.846	0.7471	2.2843	75.1592	8.7125	5.9929	5.8594	1.53119	136.94	2.365	1.25	26.67	22.67	0.67	2.5	64.91	7.38	7.29	5.65	1.68	145	1	1.127	24.0184	24.1272	0.8999	2.3693	74.6446	7.4219	7.03766	5.5301	1.60874	158.732	-0.2311
H0393	0.8457	23.5246	19.8777	0.49	3.5512	31.3846	6.46147	6.29685	5.20983	1.55998	120.224	1.37797	0.4601	18.1154	18.846	0.0701	3.7843	35.7892	5.5625	4.4429	4.5094	1.32119	131.94	-0.635	0.86	23.45	19	0.34	3.5	11.5	6.31	6.88	5.35	1.68	95	2	1.217	29.0084	21.7872	1.0599	3.3693	46.8646	7.5119	7.56766	5.7701	1.67874	133.732	2.7689
H0394	0.8057	21.9746	21.6577	0.439	2.71787	48.6846	6.8448	6.97019	5.50317	1.54331	145.224	1.04463	0.6801	22.9454	20.846	0.7471	3.2843	50.8192	6.8325	7.8829	5.4794	1.57119	151.94	2.365	0.84	19.47	20.67	0.17	3	40.71	6.81	6.7	5.6	1.57	135	0	0.897	23.5084	23.4572	0.3999	1.8693	54.5246	6.8919	6.32766	5.4301	1.48874	148.732	0.7689
H0396	0.799033	22.5913	20.2144	0.16	2.88453	43.6113	7.2248	6.78352	5.68983	1.53664	146.891	0.377967	0.5001	18.5354	17.846	0.0701	2.7843	40.1492	7.3925	6.6429	5.5694	1.53119	151.94	1.365	1.02	23.28	21.67	0.17	4	38.72	7.51	7.07	5.82	1.59	130	0	0.877	25.9584	21.1272	0.2399	1.8693	51.9646	6.7719	6.63766	5.6801	1.48874	158.732	-0.2311
H0397	1.11237	25.1346	21.3244	0.27	1.38453	65.8979	7.25813	7.84352	5.8265	1.64331	123.557	1.37797	1.1801	23.6154	23.846	0.0701	1.7843	69.9892	7.9125	8.9029	5.9494	1.64119	96.9402	1.365	1.11	26.25	19	0.34	1	58.85	6.99	7.47	5.84	1.69	130	1	1.047	25.5384	21.1272	0.3999	1.3693	68.8546	6.8719	7.15766	5.6901	1.59874	143.732	1.7689
H0398	1.0757	22.6779	21.5444	1.65233	2.88453	56.0279	7.3548	7.43352	5.96983	1.55331	156.891	1.37797	1.0301	24.1254	22.846	2.7271	2.7843	48.2492	7.1425	8.1829	6.1794	1.56119	156.94	2.365	1.24	23.28	21	0.83	3	52.83	7.48	7.18	5.95	1.59	150	1	0.957	20.6284	20.7872	1.3999	2.8693	67.0046	7.4419	6.93766	5.7801	1.50874	163.732	0.7689
H0399	0.7157	24.3713	19.9911	1.439	3.0512	27.5879	7.05813	6.64019	5.36317	1.62331	126.891	1.37797	0.3101	24.7154	21.846	0.7471	2.2843	35.9492	6.7625	5.4129	4.9794	1.48119	166.94	2.365	0.84	21.17	19	0.67	3	11.29	6.7	6.9	5.43	1.7	100	1	0.997	27.2284	19.1272	2.8999	3.8693	35.5246	7.7119	7.60766	5.6801	1.68874	113.732	0.7689
H0402	1.39237	28.1279	21.9911	0.437667	2.5512	54.6479	6.15147	6.49352	5.44983	1.60664	138.557	1.04463	1.7701	29.4654	22.846	0.0831	1.7843	73.7692	6.5125	5.8429	5.4594	1.59119	116.94	0.365	1.21	28.79	22.67	0.83	3	31.74	6.28	7.12	5.56	1.67	135	1	1.197	26.1284	20.4572	0.3999	2.8693	58.4346	5.6619	6.51766	5.3301	1.55874	163.732	1.7689
H0403	1.10903	23.6679	24.1011	0.111	2.38453	58.8346	7.0348	7.12352	5.62317	1.61998	151.891	0.7113	1.2401	23.1954	22.846	0.0831	2.7843	57.7492	7.5925	7.6029	5.9094	1.63119	146.94	1.365	1.07	22.44	22.67	0.01	2.5	53.85	6.6	6.93	5.53	1.64	150	0	1.017	25.3684	26.7872	0.2399	1.8693	64.9046	6.9119	6.83766	5.4301	1.58874	158.732	0.7689
H0405	1.14237	24.3713	19.7677	0.216667	2.88453	74.8979	7.5748	6.32685	5.6265	1.65664	146.891	1.04463	1.4101	26.3254	21.846	0.0701	2.7843	75.7292	8.3025	5.2529	5.9694	1.71119	141.94	1.365	1.08	23.2	18.67	0.34	3.5	80.44	7.6	7.02	5.52	1.68	155	1	0.937	23.5884	18.7872	0.2399	2.3693	68.5246	6.8219	6.70766	5.3901	1.57874	143.732	0.7689
H0406	1.2857	22.8213	21.8811	0.216667	2.88453	55.3046	7.7148	7.01352	5.6565	1.73998	134.366	1.37797	1.6101	22.3454	21.846	0.0701	2.7843	55.7992	7.5525	6.0129	5.8294	1.73119	NA	-0.635	1.18	23.2	22.67	0.01	3	56.83	8.26	7.74	5.62	1.81	140	2	1.067	22.9184	21.1272	0.5699	2.8693	53.2846	7.3319	7.28766	5.5201	1.67874	128.732	2.7689
H0407	1.24237	24.7079	23.6544	0.217667	2.21787	53.5513	7.90147	7.78019	6.28983	1.68331	136.891	1.37797	1.6201	25.9854	25.846	0.0831	2.2843	61.8092	8.4125	7.3629	6.6094	1.71119	136.94	1.365	1.22	23.11	22.33	0.17	2.5	51.86	7.51	7.92	6.21	1.67	145	1	0.887	25.0284	22.7872	0.3999	1.8693	46.9846	7.7819	8.05766	6.0501	1.66874	128.732	1.7689
H0409	1.2057	26.7713	21.6577	1.22	2.38453	59.8679	6.39813	7.02685	5.65983	1.52664	140.224	1.7113	1.3301	27.7654	22.846	0.7601	2.2843	68.0092	5.9425	7.6729	5.5694	1.53119	151.94	2.365	1.31	26.84	23	1.67	3	66.98	6.51	6.65	5.77	1.52	135	2	0.977	25.7084	19.1272	1.2299	1.8693	44.6146	6.7419	6.75766	5.6401	1.52874	133.732	0.7689
H0410	1.19903	24.8779	21.2111	0.332333	2.88453	51.8213	9.37147	7.84019	6.5465	1.65331	128.557	1.37797	1.3201	25.9854	21.846	0.0971	2.7843	51.0692	9.9425	6.7329	6.6194	1.59119	131.94	3.365	1.17	24.13	21	0.5	3	41.01	8.73	8.26	6.48	1.69	115	0	1.107	24.5184	20.7872	0.3999	2.8693	63.3846	9.4419	8.52766	6.5401	1.67874	138.732	0.7689
H0411	1.2657	25.4746	21.6544	1.43667	2.0512	70.3446	6.50813	6.91019	5.7665	1.52998	133.557	1.37797	1.6201	24.6354	22.846	1.4101	2.7843	85.7892	6.8425	7.3929	6.0194	1.52119	146.94	2.365	1.12	27.01	20.33	2.33	2	74.64	6.25	6.74	5.67	1.57	120	1	1.057	24.7784	21.7872	0.5699	1.3693	50.6046	6.4319	6.59766	5.6101	1.49874	133.732	0.7689
H0412	0.969033	22.5679	19.7677	0.436667	2.88453	67.6479	7.2048	6.55685	5.84317	1.46664	145.224	0.7113	1.1001	25.4854	19.846	0.0701	2.2843	66.2792	7.8425	6.8329	6.0094	1.50119	151.94	2.365	0.95	22.86	20	0.67	3	55.16	6.55	6.38	5.76	1.47	135	0	0.857	19.3584	19.4572	0.5699	3.3693	81.5046	7.2219	6.45766	5.7601	1.42874	148.732	-0.2311
H0413	1.52237	27.6746	20.7677	1.66333	1.38453	63.9346	8.4648	7.83352	6.6265	1.64998	153.557	1.37797	1.9201	29.5454	21.846	0.7601	1.7843	69.0592	9.3825	6.3829	6.7594	1.61119	136.94	3.365	1.48	28.96	19	2.67	1	47.66	8.15	8.64	6.57	1.71	155	0	1.167	24.5184	21.4572	1.5599	1.3693	75.0846	7.8619	8.47766	6.5501	1.62874	168.732	0.7689
H0414	1.07237	24.0346	23.1011	0.279	2.71787	54.2313	8.26813	6.83019	6.18317	1.50998	146.891	0.7113	1.1601	24.3854	20.846	0.0971	2.2843	56.7492	9.8625	6.2529	6.3694	1.51119	136.94	2.365	1.16	25.4	24.67	0.34	2.5	44.52	7.86	7.5	6.22	1.58	145	0	0.897	22.3184	23.7872	0.3999	3.3693	61.4246	7.0819	6.73766	5.9601	1.43874	158.732	-0.2311
H0415	1.10237	20.3079	17.8811	2.15	2.71787	42.0079	7.6348	7.48019	5.6865	1.67331	138.557	0.7113	1.0201	19.3854	17.846	3.0601	2.7843	49.8792	6.9325	7.3729	5.6394	1.57119	141.94	1.365	1.19	22.01	19.67	2.33	3	32.34	7.94	7.53	5.66	1.77	135	0	1.097	19.5284	16.1272	1.0599	2.3693	43.8046	8.0319	7.53766	5.7601	1.67874	138.732	0.7689
H0418	1.05903	22.8479	21.4344	0.213333	2.38453	58.0079	7.07813	7.83352	5.67983	1.59998	138.557	1.04463	1.1501	22.6054	21.846	0.0701	2.2843	62.3092	7.8225	9.8229	5.8394	1.66119	151.94	2.365	0.81	21.25	19.33	0.17	3	48.64	6.16	6.32	5.39	1.54	130	1	1.217	24.6884	23.1272	0.3999	1.8693	63.0746	7.2519	7.35766	5.8101	1.59874	133.732	-0.2311
H0420	1.0757	24.4846	21.6577	0.216667	3.5512	63.3746	7.46147	7.32685	5.44317	1.66331	131.866	1.7113	1.2201	26.4154	23.846	0.0701	2.2843	80.4992	7.8425	7.9029	5.4594	1.68119	NA	2.365	0.86	23.28	22	0.34	4	64.01	7.01	6.67	5.32	1.64	145	2	1.147	23.7584	19.1272	0.2399	4.3693	45.6146	7.5319	7.40766	5.5501	1.66874	118.732	0.7689
H0421	1.2357	24.0046	22.4344	0.106667	3.0512	71.0113	8.26813	7.63352	5.5765	1.76998	140.224	1.7113	1.6001	25.0554	22.846	0.0701	2.7843	84.9892	10.0125	8.7629	5.9694	1.93119	141.94	2.365	1.08	21.59	21.67	0.01	3.5	79.02	8.11	7.15	5.4	1.73	145	1	1.027	25.3684	22.7872	0.2399	2.8693	49.0246	6.6819	6.98766	5.3601	1.64874	133.732	1.7689
H0422	1.06903	23.1013	19.8811	1.89	1.71787	67.2613	10.8781	9.96019	5.9365	1.93664	151.891	1.7113	1.1201	23.0254	20.846	0.1101	0.7843	71.0092	11.4025	11.9529	5.8594	1.96119	161.94	3.365	1	22.01	18.67	3	2.5	60.38	10.47	8.75	5.96	1.92	140	1	1.087	24.2684	20.1272	2.5599	1.8693	70.3946	10.7619	9.17766	5.9901	1.92874	153.732	0.7689
H0423	1.18237	20.1146	24.3211	1.271	3.5512	72.8046	7.70813	7.80019	5.86317	1.66998	148.557	1.37797	1.6501	21.6754	24.846	1.7431	3.2843	71.6392	8.5425	9.1229	6.2594	1.74119	166.94	2.365	0.96	18.63	24.33	1.17	3.5	79.26	7.54	7.4	5.84	1.68	140	1	0.937	20.0384	23.7872	0.8999	3.8693	67.5146	7.0419	6.87766	5.4901	1.58874	138.732	0.7689
H0425	1.3757	27.8446	22.4344	0.666667	2.88453	80.9079	9.90813	9.04685	6.2365	1.74331	155.224	1.04463	1.8001	29.2054	24.846	0.7601	2.2843	80.1692	9.9725	9.7229	5.8894	1.73119	131.94	0.365	1.15	26.42	24.33	0.67	3.5	101.74	9.94	8.53	6.29	1.78	170	2	1.177	27.9084	18.1272	0.5699	2.8693	60.8146	9.8119	8.88766	6.5301	1.71874	163.732	0.7689
H0426	1.4857	25.7813	25.3211	0.217667	2.5512	90.6746	10.1181	9.15019	5.9365	1.80331	141.891	1.37797	1.7001	25.7354	23.846	0.0831	2.7843	79.5792	11.1625	10.9429	6.0294	1.81119	131.94	1.365	1.37	24.21	27.33	0.17	2.5	88.68	9.17	7.91	5.8	1.79	145	2	1.387	27.3984	24.7872	0.3999	2.3693	103.765	10.0219	8.59766	5.9801	1.80874	148.732	0.7689
H0427	1.06237	24.9946	21.1011	1.05	2.5512	58.7213	8.34813	8.37685	6.19317	1.68998	148.557	1.04463	1.0301	24.4654	20.846	1.4101	3.2843	56.5392	8.5025	9.6029	6.3994	1.75119	156.94	2.365	1.12	24.13	20.67	1.17	2	58.25	8.51	7.72	6.06	1.69	140	1	1.037	26.3884	21.7872	0.5699	2.3693	61.3746	8.0319	7.80766	6.1201	1.62874	148.732	-0.2311
H0428	1.3857	23.9779	22.7677	0.437667	1.71787	77.4613	9.42813	9.11019	6.2265	1.88998	148.557	1.04463	1.5601	23.8754	21.846	0.0831	2.7843	67.9192	10.0725	9.9429	6.5594	1.99119	131.94	1.365	1.2	22.69	22.67	0.83	1.5	87.03	9.09	8.71	6.01	1.89	155	1	1.397	25.3684	23.7872	0.3999	0.8693	77.4346	9.1219	8.67766	6.1101	1.78874	158.732	0.7689
H0429	1.0957	24.8279	20.5477	0.666667	1.71787	64.7646	10.1215	9.25685	6.03317	1.80331	153.557	1.7113	1.0501	24.0454	20.846	0.1101	0.7843	47.3792	10.4425	10.1429	5.8194	1.75119	156.94	0.365	1.23	26.42	18.67	0.83	1.5	72.14	9.92	8.78	6.05	1.88	155	2	1.007	24.0184	22.1272	1.0599	2.8693	74.7746	10.0019	8.84766	6.2301	1.77874	148.732	2.7689
H0430	1.56237	27.8713	25.6577	0.217667	2.38453	77.2079	7.43813	8.30019	6.01983	1.68331	155.224	1.7113	2.1501	28.2754	25.846	0.0831	1.7843	77.4792	7.7925	9.6229	6.2594	1.71119	146.94	3.365	1.31	27.09	25	0.17	3	87.59	7.36	7.79	6.03	1.7	165	1	1.227	28.2484	26.1272	0.3999	2.3693	66.5546	7.1619	7.48766	5.7701	1.63874	153.732	0.7689
H0431	0.959033	21.9179	23.7677	0.326667	2.88453	40.2313	6.1848	7.09685	5.58317	1.58664	133.557	2.04463	1.0401	20.9954	23.846	0.0701	1.7843	47.0592	6.0225	8.2129	5.8794	1.63119	131.94	1.365	0.88	22.01	24	0.34	3.5	25.68	6.08	6.39	5.36	1.58	130	2	0.957	22.7484	23.4572	0.5699	3.3693	47.9546	6.4519	6.68766	5.5101	1.54874	138.732	2.7689
H0432	1.2057	25.0513	24.1011	0.553333	2.71787	92.7346	7.05813	7.55352	5.90983	1.56331	146.891	1.7113	1.3101	24.8854	23.846	0.7601	3.2843	83.6592	7.4525	9.3329	6.2094	1.66119	136.94	3.365	1.28	24.98	24.67	0.5	3	108.48	6.82	6.86	5.82	1.57	150	1	1.027	25.2884	23.7872	0.3999	1.8693	86.0646	6.9019	6.46766	5.7001	1.45874	153.732	0.7689
H0433	0.872367	22.2846	22.1011	0.34	1.88453	52.8913	7.6248	7.64685	5.90317	1.66331	138.557	2.04463	0.9601	25.3154	24.846	0.1101	1.7843	64.0392	7.9125	8.3129	6.0994	1.69119	146.94	3.365	0.75	19.47	19.67	0.34	1.5	41.12	7.81	7.59	5.9	1.72	130	2	0.907	22.0684	21.7872	0.5699	2.3693	53.5146	7.1519	7.03766	5.7101	1.57874	138.732	0.7689
H0434	1.1057	21.4379	21.8811	0.274333	2.38453	76.6846	6.3548	7.53019	5.11983	1.63664	145.224	1.7113	1.3301	20.6554	22.846	0.0831	2.2843	79.9292	6.3525	9.7729	5.1894	1.67119	136.94	3.365	1.03	22.01	22.67	0.01	3	80.13	6.16	6.5	5.09	1.67	150	1	0.957	21.6484	20.1272	0.7299	1.8693	69.9946	6.5519	6.31766	5.0801	1.56874	148.732	0.7689
H0435	1.12237	22.4246	20.9877	1.76333	2.88453	75.4313	8.17147	8.41352	6.17983	1.67664	148.557	2.04463	1.2901	21.5854	19.846	3.0601	3.2843	75.9792	8.1025	9.5929	6.4394	1.72119	161.94	-0.635	0.91	22.86	19.33	1.17	3	53.13	8.19	7.99	6.06	1.72	140	3	1.167	22.8284	23.7872	1.0599	2.3693	97.1846	8.2219	7.65766	6.0401	1.58874	143.732	3.7689
H0436	0.919033	24.5413	19.5444	1.211	2.5512	71.1879	8.44813	7.87685	6.00317	1.74331	151.891	1.7113	0.9801	24.8854	20.846	2.3931	2.7843	78.5092	8.9625	7.9629	6.1094	1.83119	146.94	1.365	0.79	22.35	17	0.34	2.5	56.99	8.18	8.13	6.04	1.75	155	1	0.987	26.3884	20.7872	0.8999	2.3693	78.0646	8.2019	7.53766	5.8601	1.64874	153.732	2.7689
H0437	0.639033	21.0146	21.2144	0.722333	2.88453	39.7313	4.80147	5.90019	5.1065	1.44998	126.891	1.37797	0.4501	20.2354	20.846	0.0971	2.7843	47.8692	4.7825	6.5029	5.2694	1.46119	141.94	2.365	0.64	20.32	22.67	0.17	2.5	21.92	4.41	5.39	4.96	1.44	110	1	0.827	22.4884	20.1272	1.8999	3.3693	49.4046	5.2119	5.80766	5.0901	1.44874	128.732	0.7689
H0438	0.992367	22.5113	21.5444	0.5	2.38453	73.3113	6.76147	7.34685	5.5465	1.62664	141.891	2.04463	1.1701	21.5054	22.846	0.7601	2.7843	75.3992	7.0525	8.7029	5.8394	1.70119	141.94	2.365	0.94	23.28	21	0.5	3	76.9	6.59	6.87	5.43	1.66	140	2	0.867	22.7484	20.7872	0.2399	1.3693	67.6346	6.6419	6.46766	5.3701	1.51874	143.732	1.7689
H0439	0.8957	20.5913	20.9911	0.106667	3.0512	44.6113	8.22147	7.78685	5.7465	1.72998	136.891	1.37797	0.8901	19.2154	21.846	0.0701	2.7843	53.3192	8.6325	8.5329	5.9694	1.76119	141.94	-0.635	0.8	21.42	21	0.01	3.5	33.28	8.21	7.42	5.59	1.76	135	1	0.997	21.1384	20.1272	0.2399	2.8693	47.2346	7.8219	7.40766	5.6801	1.66874	133.732	3.7689
H0440	1.1057	18.1079	20.2111	0.106667	2.88453	60.5679	8.35147	9.01352	5.70317	1.70998	145.224	1.7113	1.0401	15.0654	16.846	0.0701	2.2843	55.2392	9.7425	13.0229	6.0594	1.83119	166.94	0.365	1.2	17.78	20.33	0.01	4	72.9	8.27	7.18	5.49	1.72	135	1	1.077	21.4784	23.4572	0.2399	2.3693	53.5646	7.0419	6.83766	5.5601	1.57874	133.732	3.7689
H0441	1.2057	28.5213	23.1011	1.65233	2.71787	56.5379	8.1648	8.77685	6.2365	1.79998	151.891	1.37797	1.1701	29.2954	22.846	2.7271	3.2843	53.2992	8.1125	9.1129	6.3294	1.84119	151.94	0.365	1.19	27.94	22	1.33	2.5	69.44	8.56	8.74	6.13	1.85	160	1	1.257	28.3284	24.4572	0.8999	2.3693	46.8746	7.8219	8.47766	6.2501	1.70874	143.732	2.7689
H0442	1.16903	24.3479	21.9911	0.886667	2.71787	51.2613	7.02147	7.55352	5.81983	1.60998	146.891	1.37797	1.4001	25.6554	23.846	0.7601	2.7843	53.3792	7.4725	8.4629	5.8494	1.65119	131.94	1.365	1.15	23.71	22.67	0.67	2	53.96	6.3	6.93	5.7	1.61	165	1	0.957	23.6784	19.4572	1.2299	3.3693	46.4446	7.2919	7.26766	5.9101	1.56874	143.732	1.7689
H0443	0.972367	24.0646	19.6577	2.04	1.88453	62.1779	9.15147	8.70352	5.88317	1.80331	148.557	0.7113	1.0001	25.6554	20.846	3.0601	1.7843	63.6892	9.9125	10.0629	5.9894	1.87119	151.94	-0.635	0.87	22.86	20	2.33	2	52.28	8.57	7.89	5.74	1.8	155	0	1.047	23.6784	18.1272	0.7299	1.8693	70.5646	8.9719	8.15766	5.9201	1.73874	138.732	2.7689
H0444	1.1757	20.5379	17.2144	0.551	3.38453	66.8313	7.33147	8.16019	6.25317	1.63331	141.891	1.37797	1.1101	18.9654	17.846	0.0831	2.7843	60.2192	6.6325	8.8329	6.2894	1.65119	146.94	-0.635	1.17	22.44	16.67	0.67	4	71.78	7.23	7.48	5.99	1.64	140	1	1.247	20.2084	17.1272	0.8999	3.3693	68.4946	8.1319	8.16766	6.4801	1.60874	138.732	3.7689
H0446	0.9157	23.5246	19.5477	0.331	3.21787	51.3746	8.38147	7.39685	5.90983	1.61331	141.891	1.7113	0.9101	24.2954	20.846	0.0831	2.7843	58.4692	8.4325	7.4729	5.8394	1.61119	136.94	-0.635	0.8	25.4	17.67	0.67	3.5	31.19	7.92	7.39	5.92	1.66	125	3	1.037	20.8784	20.1272	0.2399	3.3693	64.4646	8.7919	7.32766	5.9701	1.56874	163.732	2.7689
H0447	1.0757	25.5579	20.9911	1.10667	2.5512	60.6446	8.46147	7.76352	6.10983	1.62998	155.224	1.37797	1.1301	28.6954	21.846	1.4101	3.2843	61.9692	9.2225	8.2129	6.3394	1.66119	136.94	0.365	1.16	25.4	20	1.67	2.5	64.8	8.42	7.8	6.04	1.68	170	1	0.937	22.5784	21.1272	0.2399	1.8693	55.1646	7.7419	7.27766	5.9501	1.54874	158.732	2.7689
H0448	0.9857	22.0613	18.6577	0.335667	3.21787	52.1613	8.79147	7.41685	5.9365	1.65331	146.891	1.7113	0.9801	22.7754	18.846	0.0971	3.2843	47.3292	8.8225	6.4329	5.9494	1.57119	146.94	2.365	1.05	23.03	19.67	0.34	3	56.17	8.73	8.04	5.98	1.74	140	1	0.927	20.3784	17.4572	0.5699	3.3693	52.9846	8.8219	7.77766	5.8801	1.64874	153.732	1.7689
H0449	1.47237	28.1246	19.8811	1.22667	3.5512	98.5879	9.49147	8.85685	6.2265	1.71998	150.224	1.37797	1.7401	28.6954	19.846	0.1101	3.2843	74.8692	9.4125	10.3129	6.3394	1.77119	141.94	2.365	1.28	26.67	19.67	0.67	4	107.2	9.82	8.22	6.18	1.75	155	1	1.397	29.0084	20.1272	2.8999	3.3693	113.695	9.2419	8.03766	6.1601	1.63874	153.732	0.7689
H0450	1.3657	27.9846	21.4344	0.61	1.71787	75.4313	7.33813	8.04685	6.07317	1.63664	141.891	1.04463	1.4001	28.7854	20.846	0.7601	2.2843	60.2492	7.6425	8.9829	6.3094	1.64119	141.94	2.365	1.45	26.67	22	0.67	1	87.19	7.42	7.75	6	1.68	140	0	1.247	28.4984	21.4572	0.3999	1.8693	78.8546	6.9519	7.40766	5.9101	1.58874	143.732	0.7689
H0451	0.542367	22.2313	14.2144	0.67	1.38453	26.0913	6.34147	7.16352	5.4665	1.78998	126.891	2.04463	0.1801	22.7754	13.846	0.1101	-0.2157	35.4792	1.8225	4.2429	4.3594	1.60119	141.94	1.365	0.6	22.44	15.67	0.67	0.5	3.7	7.05	8.1	6.04	1.81	120	2	0.847	21.4784	13.1272	1.2299	3.8693	39.0946	10.1519	9.14766	6.0001	1.95874	118.732	2.7689
H0452	1.15237	30.6379	21.2111	1.87433	3.38453	74.1513	8.8548	8.39352	6.31983	1.65664	146.891	0.7113	0.9401	31.9154	21.846	2.3931	2.7843	54.8892	7.7625	8.8329	6.2694	1.62119	136.94	2.365	1.32	30.06	21.33	1.33	4	84.4	9.06	7.98	6.26	1.69	155	0	1.197	29.9384	20.4572	1.8999	3.3693	83.1646	9.7419	8.36766	6.4301	1.65874	148.732	-0.2311
H0455	1.3957	27.3913	21.1011	0.832333	3.38453	58.2346	10.4248	10.2202	6.4765	1.88664	136.891	1.7113	1.7001	26.8354	20.846	0.0971	2.7843	50.2792	10.8225	11.9329	6.5794	1.89119	146.94	0.365	1.29	29.21	23	1.17	3.5	66.27	10.72	9.28	6.46	1.88	145	2	1.197	26.1284	19.4572	1.2299	3.8693	58.1546	9.7319	9.44766	6.3901	1.88874	118.732	2.7689
H0456	0.9957	26.9379	18.5477	2.04	3.38453	45.5613	8.97147	8.19685	6.30317	1.73664	126.891	1.37797	0.8701	24.5454	16.846	2.0601	3.2843	42.1092	8.8225	7.8629	6.6694	1.71119	121.94	-0.635	1.02	26.67	20.67	2	3.5	41.6	8.42	8	6.01	1.74	130	2	1.097	29.5984	18.1272	2.0599	3.3693	52.9746	9.6719	8.72766	6.2301	1.75874	128.732	2.7689
H0458	1.1657	25.9546	21.1011	1.43667	2.38453	57.9079	8.6448	7.79685	6.4565	1.61998	148.557	2.04463	1.2901	26.5854	21.846	1.4101	2.7843	49.1192	9.1325	7.2729	6.6794	1.57119	141.94	2.365	1.19	27.94	23.33	2.33	2.5	68.08	8.56	8.16	6.43	1.66	145	1	1.017	23.3384	18.1272	0.5699	1.8693	56.5246	8.2419	7.95766	6.2601	1.62874	158.732	2.7689
H0459	1.32903	23.7813	18.3211	2.43	2.71787	55.9879	9.20813	8.59352	6.2865	1.81331	153.557	1.37797	1.2601	20.6554	16.846	2.0601	3.2843	49.1792	8.9125	8.4929	6.5294	1.83119	136.94	1.365	1.63	26.25	19.33	3.33	2.5	62.79	9.57	8.62	6.18	1.82	160	1	1.097	24.4384	18.7872	1.8999	2.3693	55.9946	9.1419	8.66766	6.1501	1.78874	163.732	1.7689
H0460	0.789033	22.0879	17.6544	0.943333	3.0512	46.1379	8.12813	8.12019	6.4865	1.58998	138.557	1.04463	0.7101	23.6154	18.846	0.7601	3.2843	50.0592	8.8325	8.8429	6.7794	1.62119	131.94	2.365	0.94	22.44	19.33	0.67	3	35.29	7.44	7.66	6.36	1.58	140	1	0.717	20.2084	14.7872	1.3999	2.8693	53.0646	8.1119	7.85766	6.3201	1.56874	143.732	-0.2311
H0461	1.07237	20.7046	19.7677	1.55	2.5512	62.1579	9.2648	8.72019	6.24317	1.73998	141.891	0.7113	1.0001	19.0454	17.846	0.7601	2.7843	59.8992	10.1125	8.9529	6.1294	1.70119	126.94	0.365	1.25	21.17	19	1.33	3.5	48.98	8.49	8.43	6.22	1.79	145	1	0.967	21.8984	22.4572	2.5599	1.3693	77.5946	9.1919	8.77766	6.3801	1.72874	153.732	0.7689
H0462	0.989033	24.6813	20.6544	2.48667	3.0512	65.1979	7.70147	7.84352	6.52983	1.62331	143.557	1.37797	1.0301	26.1554	22.846	3.0601	3.2843	73.2192	7.9125	7.5429	6.8094	1.64119	141.94	0.365	1.07	25.82	20.33	2	2.5	62.63	7.76	8.03	6.33	1.66	140	1	0.867	22.0684	18.7872	2.3999	3.3693	59.7446	7.4319	7.95766	6.4501	1.56874	148.732	2.7689
H0463	0.7057	17.5746	18.8777	2.87567	3.71787	34.0413	10.4915	8.86352	6.66983	1.80331	141.891	1.37797	0.2501	13.8854	18.846	2.7271	3.7843	39.4892	8.4725	7.2529	6.3894	1.69119	146.94	-0.635	0.9	21	18.33	2	3.5	4.38	11.22	9.25	6.59	1.86	140	2	0.967	17.8384	19.4572	3.8999	3.8693	58.2546	11.7819	10.0877	7.0301	1.85874	138.732	2.7689
H0464	1.18237	24.4579	20.5477	0.38	2.88453	63.0213	9.2048	8.50352	6.6365	1.83664	138.557	1.04463	1.4101	24.4654	19.846	0.0701	1.7843	63.3892	9.5025	6.9529	6.9794	1.86119	126.94	-0.635	1.05	23.54	22.67	0.34	4	68.77	8.89	8.9	6.29	1.83	145	2	1.087	25.3684	19.1272	0.7299	2.8693	56.9046	9.2219	9.65766	6.6401	1.81874	143.732	1.7689
H0469	1.28237	22.4546	20.6544	0.889	3.0512	73.0513	7.35147	7.97352	5.7465	1.64331	143.557	1.04463	1.4301	21.7554	21.846	0.0971	2.7843	60.2692	6.1525	8.6329	5.5194	1.54119	151.94	1.365	1.34	22.86	22.33	0.34	3	111.41	7.49	7.46	5.83	1.7	145	1	1.077	22.7484	17.7872	2.2299	3.3693	47.4746	8.4119	7.82766	5.8901	1.68874	133.732	0.7689
H0470	0.752367	24.5713	18.1011	1.76667	3.38453	37.4413	7.2148	7.69352	6.0165	1.59664	141.891	1.04463	0.6201	27.8554	18.846	1.4101	2.7843	43.8192	6.5825	7.4729	5.8094	1.51119	136.94	0.365	0.88	24.13	20.33	1.33	3.5	28.98	6.93	7.19	5.89	1.6	155	1	0.757	21.7284	15.1272	2.5599	3.8693	39.5246	8.1319	8.41766	6.3501	1.67874	133.732	1.7689
H0471	1.1457	26.4613	20.1011	1.54767	2.5512	52.7679	7.60813	7.53685	5.65983	1.64664	155.224	1.04463	1.1601	26.0754	19.846	0.0831	2.7843	71.3292	7.8425	7.9829	5.7394	1.61119	151.94	1.365	1.25	26.67	20	2.33	2.5	21.15	7.41	7.23	5.59	1.69	155	1	1.027	26.6384	20.4572	2.2299	2.3693	65.8246	7.5719	7.39766	5.6501	1.63874	158.732	0.7689
H0473	1.3457	29.3113	20.6544	1.88333	3.71787	70.1613	10.0848	8.94685	6.5165	1.69664	128.557	1.04463	1.3501	28.1054	21.846	0.7601	3.2843	58.5092	10.7225	9.4429	6.2994	1.64119	131.94	1.365	1.6	30.06	21.33	1.33	4	88.65	10.94	9.09	6.73	1.81	130	1	1.087	29.7684	18.7872	3.5599	3.8693	63.3246	8.5919	8.30766	6.5201	1.63874	123.732	0.7689
H0475	0.909033	25.6146	23.1011	0.437667	2.71787	54.3746	6.6848	7.01019	5.6965	1.57331	140.224	1.04463	0.9001	25.7354	24.846	0.0831	2.2843	52.6392	6.6525	7.5129	5.8394	1.59119	141.94	0.365	0.79	24.98	22.67	0.17	2.5	64.08	6.27	6.37	5.44	1.55	145	1	1.037	26.1284	21.7872	1.0599	3.3693	46.4046	7.1319	7.14766	5.8101	1.57874	133.732	1.7689
H0476	0.8757	26.4879	18.5444	1.761	3.21787	35.3813	8.8548	8.51352	6.81317	1.68664	138.557	1.04463	0.7601	24.4654	17.846	3.3931	3.2843	38.2192	7.9725	7.7429	6.6894	1.64119	151.94	-0.635	1.02	27.94	20	0.83	3	24.51	9.74	8.91	6.82	1.75	135	1	0.847	27.0584	17.7872	1.0599	3.3693	43.4146	8.8519	8.88766	6.9301	1.66874	128.732	2.7689
H0481	1.00237	22.5113	23.4344	0.712333	2.71787	61.1713	7.36147	8.05352	6.1165	1.58998	155.224	1.04463	1.0301	23.1954	24.846	1.3971	2.7843	52.0392	7.0925	9.4529	6.3394	1.60119	161.94	2.365	1.05	21.76	22.33	0.34	3	70.4	7.95	7.72	6.25	1.62	150	1	0.927	22.5784	23.1272	0.3999	2.3693	61.0746	7.0419	6.98766	5.7601	1.54874	153.732	-0.2311
H0482	1.07903	23.7246	24.1011	0.5	2.38453	51.5546	7.22147	7.55685	5.52317	1.62998	150.224	1.04463	1.1901	27.0054	25.846	0.7601	2.7843	50.6692	7.5025	9.3829	5.8194	1.69119	151.94	2.365	0.97	19.9	22	0.17	2.5	50.64	7.09	6.79	5.42	1.65	150	0	1.077	24.2684	24.4572	0.5699	1.8693	53.3546	7.0719	6.49766	5.3301	1.54874	148.732	0.7689
H0483	1.3957	22.1413	26.6577	0.169	2.88453	64.2279	7.73813	8.00019	6.11983	1.64664	148.557	1.04463	1.5201	21.5854	25.846	0.0971	2.7843	73.2792	8.2425	9.4229	6.7494	1.69119	131.94	2.365	1.47	22.52	25.67	0.17	3	61.43	7.53	7.5	5.95	1.65	155	0	1.197	22.3184	28.4572	0.2399	2.8693	57.9746	7.4419	7.07766	5.6601	1.59874	158.732	0.7689
H0484	1.29903	29.3113	22.3211	0.771	2.68465	80.4513	7.38813	9.04352	6.4465	1.53998	155.224	1.37797	1.4801	29.0354	21.846	0.0831	NA	83.6592	7.4425	12.7729	6.8894	1.63119	131.94	3.365	1.48	32.77	21.33	1.33	3	84.78	7.83	7.53	6.33	1.56	170	1	0.937	26.1284	23.7872	0.8999	2.3693	72.9146	6.8919	6.82766	6.1201	1.42874	163.732	-0.2311
H0485	1.0857	21.8613	21.9911	1.32567	2.88453	44.5179	6.8648	7.67019	5.7965	1.56998	148.557	1.37797	1.1601	21.5054	21.846	2.0771	2.7843	55.1092	7.4225	9.4429	6.1494	1.58119	131.94	1.365	1.17	22.18	22	0.34	2.5	31.04	6.74	6.95	5.71	1.6	160	1	0.927	21.8984	22.1272	1.5599	3.3693	47.4046	6.4319	6.61766	5.5301	1.52874	153.732	1.7689
H0486	1.1157	22.1979	21.9911	1.70667	2.71787	46.5946	8.6048	8.88685	5.9765	1.80998	146.891	0.7113	1.0201	21.0754	21.846	2.0601	2.7843	44.2392	8.8225	10.1329	6.1194	1.84119	126.94	0.365	1.25	23.54	22.67	0.83	2.5	53.24	8.61	8.27	5.89	1.82	165	1	1.077	21.9784	21.4572	2.2299	2.8693	42.3046	8.3819	8.25766	5.9201	1.76874	148.732	0.7689
H0487	1.05903	21.1013	23.1011	0.164333	3.0512	78.2079	6.3748	7.04019	5.19317	1.66331	145.224	1.04463	1.3101	20.6554	22.846	0.0831	2.7843	64.6792	6.7225	8.6329	5.5294	1.76119	146.94	2.365	0.95	21.17	23.33	0.01	4	96.97	6.38	6.43	5.09	1.67	155	1	0.917	21.4784	23.1272	0.3999	2.3693	72.9746	6.0219	6.05766	4.9601	1.55874	133.732	-0.2311
H0488	1.12903	23.1313	23.2144	2.541	2.21787	62.3879	7.78147	7.85019	5.64983	1.69331	140.224	0.7113	1.1801	24.5454	23.846	2.3931	2.2843	52.0292	8.4225	8.8629	5.7594	1.68119	131.94	0.365	1.16	22.44	23.67	2.67	1.5	82.5	7.4	7.28	5.6	1.71	150	1	1.047	22.4084	22.1272	2.5599	2.8693	52.6346	7.5219	7.40766	5.5901	1.68874	138.732	0.7689
H0489	0.7957	25.8979	22.3211	0.884333	1.38453	62.6613	7.30813	7.93352	5.87317	1.70998	144.366	1.7113	0.5901	26.2454	22.846	1.0931	1.2843	45.4492	6.0625	8.2329	5.8894	1.70119	NA	-0.635	0.9	26.84	23.33	0.83	1.5	79.44	8.22	7.9	5.83	1.78	150	2	0.897	24.6084	20.7872	0.7299	1.3693	63.0946	7.6419	7.66766	5.9001	1.64874	138.732	3.7689
H0490	0.749033	22.9613	19.7677	1.77667	1.0512	52.5479	6.8548	8.04019	5.58317	1.61331	136.891	1.04463	0.2301	19.8954	16.846	0.7601	1.7843	37.3592	5.7925	8.7629	5.1294	1.43119	131.94	-0.635	1	24.47	22.33	2.67	1	70.53	6.65	7.23	5.86	1.63	155	2	1.017	24.5184	20.1272	1.8999	0.3693	49.7546	8.1219	8.12766	5.7601	1.77874	123.732	1.7689
H0491	1.07903	25.1079	20.7677	3.20567	1.88453	69.9013	7.88813	8.50685	5.94317	1.79998	143.557	0.377967	1.1701	25.6554	19.846	3.7271	1.7843	51.3392	7.5425	9.7729	6.2994	1.87119	146.94	0.365	1.07	24.38	20.33	3.33	2	92.89	8.35	8	5.88	1.78	145	1	0.997	25.2884	22.1272	2.5599	1.8693	65.4746	7.7719	7.74766	5.6501	1.74874	138.732	-0.2311
H0492	0.599033	21.6913	18.8811	3.20667	3.21787	36.2513	7.2948	7.89352	5.7265	1.67664	130.224	0.377967	0.1201	19.3054	15.846	3.0601	2.7843	35.7592	4.7025	7.4729	5.2294	1.50119	141.94	-0.635	0.82	22.18	20.67	2.33	3	22.4	8.81	8.25	5.94	1.84	125	1	0.857	23.5884	20.1272	4.2299	3.8693	50.5946	8.3719	7.95766	6.0101	1.68874	123.732	0.7689
H0493	0.662367	23.0479	19.5444	1.59567	1.21787	64.4646	8.00813	8.36352	6.1065	1.80331	145.224	1.04463	0.4201	22.3454	17.846	2.7271	2.2843	43.0892	7.9025	8.3029	6.1894	1.85119	136.94	0.365	0.77	23.71	20.33	0.83	0.5	91.06	8.46	8.58	6.11	1.83	155	1	0.797	23.0884	20.4572	1.2299	0.8693	59.2446	7.6619	8.20766	6.0201	1.72874	143.732	1.7689
H0495	0.969033	21.1579	23.3244	0.389	2.38453	80.2179	6.01147	7.05685	5.45983	1.59664	135.224	1.37797	0.9701	20.0654	22.846	0.0971	2.7843	60.2392	5.3325	7.8429	5.4094	1.60119	136.94	0.365	1.04	21.93	24	0.34	2.5	120.08	6.94	7.09	5.66	1.67	145	1	0.897	21.4784	23.1272	0.7299	1.8693	60.3346	5.7619	6.23766	5.3101	1.51874	123.732	2.7689
H0497	0.819033	24.7679	18.8777	0.437667	2.71787	46.6679	6.8048	7.54019	5.6065	1.60331	149.366	1.04463	0.7301	27.8554	20.846	0.0831	2.7843	49.8092	7.8525	9.5529	6.0394	1.69119	NA	1.365	0.86	22.86	19.33	0.17	3	47.23	6.01	6.43	5.3	1.58	160	1	0.867	23.5884	16.4572	1.0599	2.3693	42.9646	6.5519	6.63766	5.4801	1.53874	138.732	0.7689
H0498	0.862367	23.9513	19.9911	0.335667	2.71787	71.4279	6.0648	6.59019	5.91983	1.45998	141.891	1.37797	0.7301	25.9854	19.846	0.0971	2.7843	65.9292	6.4225	6.9929	6.1894	1.46119	131.94	2.365	0.95	21.51	20	0.34	3	97.28	5.55	6.16	5.66	1.46	150	1	0.907	24.3584	20.1272	0.5699	2.3693	51.0746	6.2219	6.61766	5.9101	1.45874	143.732	0.7689
H0499	0.772367	20.0279	18.1011	0.942333	3.0512	45.5413	6.2648	7.16685	5.55983	1.54331	141.866	0.377967	0.3101	13.8854	15.846	0.0971	3.2843	36.7792	5.7225	7.5029	5.4694	1.46119	NA	-0.635	1.04	22.01	19.67	0.17	3	36.63	6.41	6.96	5.6	1.61	140	1	0.967	24.1884	18.7872	2.5599	2.8693	63.2146	6.6619	7.03766	5.6101	1.55874	143.732	0.7689
H0500	0.742367	22.0579	17.7677	0.661	2.88453	53.0513	6.6448	7.75685	5.8065	1.51664	148.557	0.7113	0.4701	19.7254	15.846	0.0831	3.2843	46.5692	6.6025	9.8329	5.8794	1.51119	141.94	1.365	0.92	20.91	17.67	0.67	3	61.22	6.69	6.67	5.71	1.56	150	1	0.837	25.5384	19.7872	1.2299	2.3693	51.3646	6.6419	6.76766	5.8301	1.47874	153.732	-0.2311
H0501	1.02903	23.7779	21.1011	0.556667	2.38453	52.7479	6.2148	7.95019	5.71317	1.60331	133.557	0.377967	0.7801	19.6354	16.846	0.7601	2.2843	43.1592	5.8225	9.8929	5.9294	1.61119	101.94	-0.635	1.14	23.28	23.33	0.34	1.5	67.78	6.26	6.83	5.59	1.6	155	1	1.167	28.4184	23.1272	0.5699	3.3693	47.3046	6.5619	7.12766	5.6201	1.59874	143.732	0.7689
H0503	0.939033	22.2246	18.7677	0.111	3.21787	65.6913	7.39813	7.93019	6.2865	1.57331	138.557	0.377967	0.6901	19.4654	17.846	0.0831	2.7843	54.8292	7.2125	8.5329	6.5694	1.54119	121.94	0.365	1.12	23.28	19.33	0.01	4	75.48	8.09	7.9	6.18	1.66	145	0	1.007	23.9284	19.1272	0.2399	2.8693	66.7646	6.8919	7.35766	6.1101	1.51874	148.732	0.7689
H0505	0.8057	21.4079	18.5444	1.051	2.5512	57.9279	6.22125	7.74145	5.9347	1.5456	131.891	0.0446333	0.5101	22.1754	21.846	0.0831	2.2843	42.2492	5.0325	8.1429	5.9294	1.46119	136.94	0.365	1.22	24.21	19	2.67	2	96.44	7.41	7.34	5.94	1.63	150	1	0.687	17.8384	14.7872	0.3999	3.3693	35.0946	NA	NA	NA	NA	108.732	-1.2311
H0506	1.21237	24.9946	23.6577	1.65667	2.5512	78.8279	7.4748	8.54019	5.84317	1.67331	151.891	0.377967	1.3901	23.9554	20.846	1.4101	2.7843	69.6092	7.7925	11.2829	6.2594	1.72119	131.94	-0.635	1.31	27.52	27	2.33	2	63.32	7.72	7.5	5.73	1.72	170	0	0.937	23.5084	23.1272	1.2299	2.8693	103.555	6.9119	6.83766	5.5401	1.57874	153.732	1.7689
H0507	0.9057	23.2979	22.4344	0.213333	2.88453	56.6846	6.74147	7.22019	5.39317	1.61998	153.557	0.377967	0.7001	20.6554	21.846	0.0701	2.7843	41.4992	6.3425	8.0929	5.4794	1.59119	141.94	0.365	1.12	25.82	23.67	0.17	3.5	64.86	7.08	6.96	5.42	1.68	155	0	0.897	23.4184	21.7872	0.3999	2.3693	63.6946	6.8019	6.60766	5.2801	1.58874	163.732	0.7689
H0508	1.02237	21.2113	22.6577	0.106667	3.21787	78.0479	6.92813	6.74685	5.21983	1.62664	146.891	0.377967	0.9201	18.8754	22.846	0.0701	2.7843	55.3592	6.2125	6.9729	5.1594	1.60119	141.94	-0.635	1.13	23.2	23	0.01	3.5	81.89	7.76	6.99	5.33	1.73	150	0	1.017	21.5584	22.1272	0.2399	3.3693	96.8946	6.8119	6.27766	5.1701	1.54874	148.732	1.7689
H0509	0.9357	22.0846	20.6577	0.384333	2.88453	74.9779	7.77813	7.80352	6.0865	1.55664	150.224	0.7113	0.8201	19.3854	19.846	0.0831	2.7843	65.3092	8.6225	8.8229	6.2194	1.52119	151.94	1.365	1	23.28	20	0.83	3.5	80.24	7.68	7.56	6.08	1.64	150	0	0.987	23.5884	22.1272	0.2399	2.3693	79.3846	7.0319	7.02766	5.9601	1.50874	148.732	0.7689
H0510	0.909033	24.3746	19.8811	2.109	2.0512	47.8979	6.74813	7.46019	5.5065	1.64998	151.891	1.04463	0.3701	22.7754	19.846	0.0971	0.7843	35.7192	4.7525	7.2029	5.0094	1.50119	151.94	2.365	1.29	24.13	19.67	3.33	2.5	60.29	8.14	7.88	5.92	1.77	155	0	1.067	26.2184	20.1272	2.8999	2.8693	47.6846	7.3519	7.29766	5.5901	1.67874	148.732	0.7689
H0511	0.7757	19.6879	23.8777	0.996667	2.0512	53.7579	6.3048	6.86685	5.4565	1.56664	150.224	1.04463	0.7001	20.6554	25.846	0.7601	1.2843	47.3992	6.2725	7.1529	5.2994	1.53119	141.94	2.365	0.88	19.9	23	0.83	1.5	59.22	6.52	6.95	5.72	1.62	155	1	0.747	18.5084	22.7872	1.3999	3.3693	54.6546	6.1219	6.49766	5.3501	1.54874	153.732	-0.2311
H0512	1.29903	24.0646	21.7677	1.04567	2.0512	74.2046	6.9948	7.10019	5.69317	1.71998	150.224	1.04463	1.6601	24.4654	22.846	0.7471	2.2843	69.3392	7.1725	6.8529	6.0894	1.75119	136.94	1.365	1.13	22.44	21	1.33	2	77.01	6.89	7.12	5.43	1.73	155	0	1.107	25.2884	21.4572	1.0599	1.8693	76.2646	6.9219	7.32766	5.5601	1.67874	158.732	1.7689
H0513	0.732367	17.4579	19.8777	0.274333	3.0512	44.9713	6.46813	7.09019	5.40317	1.54998	151.891	0.0446333	0.2401	13.8854	15.846	0.0831	3.2843	41.8592	4.8625	7.7929	5.1894	1.47119	166.94	-0.635	0.96	18.2	20.33	0.17	3	41.41	7.23	6.86	5.57	1.63	140	1	0.997	20.2884	23.4572	0.5699	2.8693	51.6446	7.3119	6.61766	5.4501	1.54874	148.732	-0.2311
H0514	0.589033	20.3946	17.7677	1.819	0.884533	40.3413	7.5748	7.69685	6.2365	1.64664	143.557	1.37797	0.1801	16.6754	15.846	2.7271	1.7843	37.6492	6.8025	7.1429	6.1494	1.64119	161.94	-0.635	0.7	22.86	18.33	1.67	0.5	25.78	8.14	8.08	6.27	1.7	130	2	0.887	21.6484	19.1272	1.0599	0.3693	57.5946	7.7819	7.86766	6.2901	1.59874	138.732	2.7689
H0515	0.9857	22.2013	20.1011	1.43333	3.38453	43.6946	7.3448	7.35685	5.42983	1.69331	135.224	1.37797	1.0201	21.5054	19.846	1.4101	3.2843	49.6092	7.4525	8.3629	5.5194	1.77119	171.94	2.365	0.8	22.01	20.67	0.83	3.5	37.25	7.25	6.74	5.33	1.68	120	1	1.137	23.0884	19.7872	2.0599	3.3693	44.2246	7.3319	6.96766	5.4401	1.62874	113.732	0.7689
H0516	0.919033	20.3646	16.9877	1.66333	2.88453	57.2279	9.49147	8.96019	6.29317	1.70664	148.557	1.04463	0.7801	17.3554	16.846	0.7601	2.7843	47.5692	8.9925	10.4029	6.1894	1.74119	151.94	1.365	0.91	21.59	16.33	2.33	3	60.88	10.18	8.45	6.35	1.76	145	1	1.067	22.1484	17.7872	1.8999	2.8693	63.2346	9.3019	8.02766	6.3401	1.61874	148.732	0.7689
H0519	0.812367	23.4979	19.5444	2.26333	2.88453	59.0579	6.85147	7.31685	5.80983	1.62998	146.891	1.04463	0.6401	24.4654	20.846	3.0601	3.2843	54.4292	6.5325	7.6429	6.0694	1.63119	151.94	2.365	0.88	23.62	20.33	2.33	2.5	75.04	6.84	7.19	5.72	1.64	155	1	0.917	22.4084	17.4572	1.3999	2.8693	47.7046	7.1819	7.11766	5.6401	1.61874	133.732	-0.2311
H0520	0.682367	16.9779	17.7677	0.719	3.88453	39.9179	6.1548	6.26019	5.00317	1.59664	125.224	1.37797	0.1901	9.2254	12.846	0.0971	3.2843	37.3692	4.9625	6.3429	4.9994	1.56119	141.94	-0.635	0.89	20.32	22.33	0.5	4	31.75	6.39	6.01	4.91	1.64	115	2	0.967	21.3884	18.1272	1.5599	4.3693	50.6346	7.1119	6.42766	5.1001	1.58874	118.732	2.7689
H0521	1.34237	25.1346	22.2111	1.04667	2.88453	67.3713	7.69147	7.62019	5.3665	1.77664	123.557	1.37797	1.2701	24.6354	20.846	1.4101	2.2843	53.4092	7.0425	8.1829	5.5094	1.75119	126.94	2.365	1.31	24.81	22.33	0.83	3.5	86.35	7.65	7.2	5.27	1.8	130	1	1.447	25.9584	23.4572	0.8999	2.8693	62.3546	8.3819	7.47766	5.3201	1.77874	113.732	0.7689
H0522	0.8957	21.4946	17.4344	2.87433	1.38453	55.4779	7.31147	7.37019	5.14317	1.71664	136.891	1.37797	0.7701	20.8254	14.846	2.3931	1.7843	59.1392	7.9725	8.6729	5.2094	1.76119	146.94	1.365	0.85	20.74	19	2.67	1.5	61.72	6.79	6.3	4.93	1.7	130	2	1.067	22.9184	18.4572	3.5599	0.8693	45.5746	7.1719	7.13766	5.2901	1.68874	133.732	0.7689
H0523	0.832367	21.8879	21.7677	0.94	2.71787	68.6813	6.23813	7.21019	5.8965	1.53998	126.891	2.04463	0.8301	20.2354	19.846	0.7601	2.7843	73.0492	6.3325	7.6729	5.8194	1.53119	126.94	2.365	0.79	21.84	20.67	1.33	2	67.98	6.03	6.92	5.83	1.57	135	2	0.877	23.5884	24.7872	0.7299	3.3693	65.0146	6.3519	7.03766	6.0401	1.51874	118.732	1.7689
H0525	1.10237	26.2079	22.3244	1.991	2.38453	91.7813	6.92147	7.05019	5.59983	1.60331	135.224	1.04463	1.2101	27.9354	24.846	1.7431	2.7843	72.9592	6.9725	7.7129	5.6194	1.68119	141.94	0.365	0.84	25.4	20	2.67	2.5	103.64	6.29	6.58	5.56	1.57	130	2	1.257	25.2884	22.1272	1.5599	1.8693	98.7446	7.5019	6.85766	5.6201	1.55874	133.732	0.7689
H0526	0.822367	21.2979	16.4344	1.87433	2.88453	37.6779	8.33147	8.72019	5.90983	1.81664	128.557	1.7113	0.3901	16.0854	15.846	2.3931	3.2843	37.6392	6.1925	9.4029	5.8094	1.79119	161.94	-0.635	0.94	24.98	17.67	1.5	2.5	20.49	9.54	8.45	6.06	1.85	110	3	1.137	22.8284	15.7872	1.7299	2.8693	54.9046	9.2619	8.30766	5.8601	1.80874	113.732	2.7689
H0527	1.03903	21.5813	18.6544	0.433333	2.88453	55.2479	8.52813	9.13019	6.2865	1.78664	136.891	1.7113	0.9601	20.6554	17.846	0.0701	2.7843	51.2592	8.1125	10.5529	6.5494	1.83119	156.94	1.365	1.03	22.44	17.33	0.17	3.5	63.68	8.59	8.13	6.06	1.76	125	2	1.127	21.6484	20.7872	1.0599	2.3693	50.8046	8.8819	8.70766	6.2501	1.76874	128.732	1.7689
H0528	1.24903	25.6179	23.2111	1.98433	2.88453	71.0246	7.14147	7.75352	5.47317	1.68998	135.224	2.04463	1.4001	25.3154	22.846	2.3931	3.2843	78.3492	7.8825	10.1229	5.7594	1.84119	126.94	2.365	1.19	26.25	25.33	2	3	85.45	6.42	6.3	5.14	1.64	145	2	1.157	25.2884	21.4572	1.5599	2.3693	49.2746	7.1219	6.83766	5.5201	1.58874	133.732	1.7689
H0530	0.992367	27.9846	22.7677	0.16	2.71787	63.6246	5.81147	7.66685	5.70983	1.48331	138.557	0.7113	1.0901	27.5154	22.846	0.0701	2.7843	67.5892	6.3325	10.6529	5.8594	1.58119	121.94	1.365	0.97	28.36	23.33	0.17	3	63.18	5.33	6.14	5.59	1.47	145	1	0.917	28.0784	22.1272	0.2399	2.3693	60.1046	5.7719	6.20766	5.6801	1.39874	148.732	-0.2311
H0531	1.13903	23.0746	22.4344	0.335667	2.0512	63.5413	7.0748	7.80019	5.8765	1.59664	133.557	1.37797	1.4801	27.0054	24.846	0.0971	2.7843	68.9992	7.3825	9.4929	6.0394	1.65119	101.94	1.365	0.92	21.17	20.33	0.67	2	50.5	6.64	7	5.87	1.58	145	1	1.017	21.0484	22.1272	0.2399	1.3693	71.1246	7.2019	6.90766	5.7201	1.55874	153.732	1.7689
H0532	0.949033	22.6813	23.4344	1.04767	2.0512	49.5213	5.84813	6.60352	5.53317	1.50331	136.891	0.7113	1.0501	24.3854	23.846	1.7431	2.2843	55.4892	6.5925	7.8629	5.9094	1.56119	131.94	1.365	0.98	22.01	22	0.83	1.5	44.87	5.32	6.07	5.4	1.5	145	1	0.817	21.6484	24.4572	0.5699	2.3693	48.2046	5.6319	5.87766	5.2901	1.44874	133.732	-0.2311
H0533	1.20903	27.0813	22.9911	1.32667	2.88453	66.9546	8.12147	8.10019	6.36983	1.64664	151.891	1.37797	1.3101	28.2754	23.846	1.4101	2.7843	58.5792	7.7525	8.7829	6.7094	1.71119	131.94	0.365	1.25	25.82	20	1.67	3	73.15	8.64	8.09	6.36	1.67	165	2	1.067	27.1484	25.1272	0.8999	2.8693	69.1346	7.9719	7.42766	6.0401	1.55874	158.732	1.7689
H0534	0.8257	24.1446	19.7677	0.225667	1.93465	46.8146	5.12147	6.11019	5.38983	1.41664	130.224	1.04463	0.5901	23.6154	17.846	0.0971	NA	53.7592	4.7825	6.7629	5.4494	1.45119	126.94	1.365	1.02	24.38	19.33	0.01	2	36.49	5.39	6.11	5.47	1.46	115	2	0.867	24.4384	22.1272	0.5699	1.8693	50.1946	5.1919	5.45766	5.2501	1.33874	148.732	-0.2311
H0535	0.919033	23.6946	20.3244	1.98567	1.88453	67.6446	6.61813	6.96019	5.56983	1.59331	146.891	1.04463	1.0201	27.3454	20.846	2.7271	3.2843	73.4392	7.6625	7.5629	5.5694	1.66119	141.94	2.365	0.85	22.01	19	2.33	1.5	64.15	6.25	6.9	5.68	1.6	145	1	0.887	21.7284	21.1272	0.8999	0.8693	65.3446	5.9419	6.41766	5.4601	1.51874	153.732	-0.2311
H0538	0.8257	21.6913	20.3244	0.661	1.0512	64.1913	6.4048	7.67352	5.6065	1.57998	143.557	1.7113	0.7901	23.7854	21.846	0.0831	2.7843	86.4192	6.9225	9.1029	5.5894	1.55119	141.94	1.365	0.69	19.05	18.67	1	0	39.85	5.51	6.51	5.48	1.56	140	2	0.997	22.2384	20.4572	0.8999	0.3693	66.3046	6.7819	7.40766	5.7501	1.62874	148.732	1.7689
H0539	0.992367	22.2579	22.7677	0.551	1.88453	62.2846	6.8748	7.90019	5.60317	1.60664	159.366	1.04463	1.1801	22.9454	24.846	0.0831	0.2843	71.5592	8.2825	11.0029	6.0794	1.75119	NA	2.365	0.96	22.44	21.33	1.17	2.5	47.78	6.31	6.55	5.4	1.59	155	1	0.837	21.3884	22.1272	0.3999	2.8693	67.5146	6.0319	6.14766	5.3301	1.47874	163.732	-0.2311
H0541	0.8957	24.4846	21.1011	0.213333	2.5512	50.1446	6.60813	6.89019	5.45983	1.65331	138.557	2.04463	1.0001	23.2754	19.846	0.0701	2.7843	52.3992	6.4725	6.7729	5.5694	1.63119	131.94	-0.635	0.82	24.13	21.67	0.17	2.5	37.74	7.11	7.11	5.46	1.72	135	3	0.867	26.0484	21.7872	0.3999	2.3693	60.2946	6.2419	6.78766	5.3501	1.60874	148.732	3.7689
H0542	1.14903	25.7546	22.5444	1.429	2.5512	75.7446	7.5948	8.69685	5.89983	1.73331	135.224	2.04463	1.3001	26.0754	23.846	2.7271	2.7843	80.2092	8.9325	11.5729	6.3694	1.89119	111.94	1.365	1.07	24.55	21.33	0.83	2	71.29	6.79	7.16	5.66	1.66	145	1	1.077	26.6384	22.4572	0.7299	2.8693	75.7346	7.0619	7.35766	5.6701	1.64874	148.732	3.7689
H0543	0.922367	22.7346	19.6544	0.556667	2.38453	45.0446	8.27813	9.02352	5.95983	1.73998	128.557	1.7113	0.8201	23.1954	19.846	0.7601	1.7843	48.6792	8.4225	10.3529	5.8194	1.66119	116.94	-0.635	1.06	22.01	21.33	0.01	2.5	46.25	8.55	8.25	5.88	1.83	145	2	0.887	22.9984	17.7872	0.8999	2.8693	40.2046	7.8619	8.46766	6.1801	1.72874	123.732	3.7689
H0545	1.44237	25.1346	22.9911	0.445667	2.21787	89.2446	8.7148	8.10019	5.76317	1.81331	143.557	1.37797	2.0301	27.3454	22.846	0.0971	2.7843	91.1992	8.7725	8.2429	5.8394	1.81119	131.94	2.365	1.05	22.86	21.67	0.67	2	99.99	8.94	8.13	5.76	1.85	150	2	1.247	25.1984	24.4572	0.5699	1.8693	76.5446	8.4319	7.92766	5.6901	1.77874	148.732	-0.2311
H0546	0.989033	24.3446	18.6577	0.495667	2.71787	56.0679	8.93813	8.27019	5.8565	1.70664	146.891	1.7113	0.9801	23.3654	17.846	0.7471	2.7843	54.8992	9.1925	9.5929	5.9694	1.73119	141.94	-0.635	0.96	24.98	18	0.01	2.5	45.93	8.82	7.66	5.9	1.71	145	3	1.027	24.6884	20.1272	0.7299	2.8693	67.3746	8.8019	7.55766	5.7001	1.67874	153.732	2.7689
H0547	0.9957	23.6079	19.9911	1.71433	2.0512	62.9913	7.72813	7.73352	5.60317	1.66664	141.891	1.37797	0.9101	22.3454	20.846	1.7431	1.2843	47.6992	7.4125	8.7329	5.6394	1.65119	121.94	1.365	1.15	19.47	19.67	2.67	3	84.4	7.86	7.39	5.66	1.71	150	2	0.927	29.0084	19.4572	0.7299	1.8693	56.8746	7.9119	7.07766	5.5101	1.63874	153.732	0.7689
H0548	1.19237	22.1113	20.8777	1.59567	2.38453	68.5979	8.2248	8.86352	5.63983	1.79664	150.224	1.37797	1.2201	23.6154	20.846	2.7271	1.7843	67.4192	8.5925	11.1929	5.8194	1.82119	131.94	1.365	1.28	20.74	22	1.33	2.5	77.46	7.9	7.72	5.6	1.81	160	1	1.077	21.9784	19.7872	0.7299	2.8693	60.9146	8.1819	7.67766	5.5001	1.75874	158.732	1.7689
H0549	1.0757	26.8546	22.3244	0.936667	2.5512	73.2213	6.86813	8.29685	5.69317	1.60664	143.557	1.37797	1.3001	28.3554	24.846	1.4101	1.7843	68.1592	7.1625	11.2629	5.8494	1.68119	116.94	1.365	1.04	27.09	23	0.83	3	75.38	6.74	6.97	5.65	1.62	155	1	0.887	25.1184	19.1272	0.5699	2.8693	76.1246	6.7019	6.65766	5.5801	1.51874	158.732	1.7689
H0550	0.8757	25.6713	20.8777	0.217667	2.0512	45.0706	6.2648	7.03685	5.3565	1.51998	144.366	1.7113	0.8601	28.6954	21.846	0.0831	1.7843	47.1292	5.4625	8.1429	5.1394	1.48119	NA	3.365	0.95	25.57	19.33	0.17	2.5	42.018	6.61	6.62	5.53	1.58	150	1	0.817	22.7484	21.4572	0.3999	1.8693	46.0646	6.7219	6.34766	5.4001	1.49874	138.732	0.7689
H0551	0.9257	21.7746	22.1011	0.331	2.71787	66.3046	6.51147	7.49685	5.77317	1.54664	136.891	1.7113	1.1101	24.4654	24.846	0.0831	1.2843	69.7092	6.7825	9.0929	5.8094	1.58119	136.94	3.365	0.82	20.74	20.67	0.34	4	76.1	6.69	6.83	5.79	1.57	145	1	0.847	20.1184	20.7872	0.5699	2.8693	53.1046	6.0619	6.56766	5.7201	1.48874	128.732	0.7689
H0552	1.0957	26.7446	22.5444	1.59433	1.88453	61.4179	8.22147	8.80019	5.9665	1.65664	138.557	2.04463	1.0501	27.1754	22.846	2.3931	1.7843	54.7692	8.6025	10.8429	5.8894	1.65119	141.94	3.365	1.31	27.77	26	1.33	1	91.63	7.52	7.46	5.82	1.67	155	1	0.927	25.2884	18.7872	1.0599	2.8693	37.8546	8.5419	8.09766	6.1901	1.64874	118.732	1.7689
H0553	1.01903	24.0079	22.6577	0.323333	1.71787	60.4813	7.01147	6.83685	5.21317	1.57664	146.891	1.7113	1.3301	27.5154	21.846	0.0701	1.7843	73.8892	6.9625	7.3929	5.0294	1.53119	151.94	3.365	0.9	22.86	25	0.5	2.5	56.58	7.06	6.62	5.3	1.64	155	1	0.827	21.6484	21.1272	0.3999	0.8693	50.9746	7.0119	6.49766	5.3101	1.55874	133.732	0.7689
H0554	0.972367	24.4579	20.7677	0.216667	2.71787	77.2946	6.6848	7.20019	5.7565	1.54664	141.866	1.7113	1.1801	27.5154	20.846	0.0701	2.2843	83.6292	7.0225	8.4229	5.9494	1.60119	NA	3.365	0.88	22.86	21.33	0.34	2.5	90.31	6.53	6.64	5.75	1.54	145	1	0.857	22.9984	20.1272	0.2399	3.3693	57.9446	6.5019	6.53766	5.5701	1.49874	138.732	0.7689
H0555	0.942367	22.3679	21.5444	1.101	2.71787	47.6913	6.18147	6.44352	5.24317	1.50998	146.891	0.7113	0.9301	24.8854	20.846	1.7431	2.2843	56.9992	7.0725	7.9029	5.5694	1.59119	156.94	2.365	1.09	21.59	20	0.5	3	22.53	5.42	5.58	5.02	1.49	150	0	0.807	20.6284	23.7872	1.0599	2.8693	63.5446	6.0519	5.84766	5.1401	1.44874	133.732	-0.2311
H0556	0.7557	20.2246	16.8777	1.76667	3.38453	61.1046	6.2548	7.35685	5.7365	1.49331	136.891	0.377967	0.7101	21.2454	15.846	2.0601	3.2843	66.3892	6.9925	9.6029	6.0694	1.57119	151.94	-0.635	0.7	19.9	19.33	0.67	3.5	65.02	5.32	6.03	5.45	1.46	130	1	0.857	19.5284	15.4572	2.5699	3.3693	51.9046	6.4519	6.43766	5.6901	1.44874	128.732	0.7689
H0557	1.0357	23.3279	20.9877	0.826667	2.21787	77.0246	7.8448	7.92352	6.06317	1.60664	150.224	1.37797	1.2901	26.9254	20.846	1.4101	3.2843	77.3792	8.1625	9.4929	6.3694	1.69119	146.94	2.365	0.89	22.01	20.33	0.5	1.5	95.6	7.58	6.98	5.86	1.58	160	1	0.927	21.0484	21.7872	0.5699	1.8693	58.0946	7.7919	7.29766	5.9601	1.54874	143.732	0.7689
H0559	0.959033	20.2246	20.9911	0.16	3.0512	72.6613	5.9848	6.60352	5.40983	1.45331	138.557	1.37797	1.3401	23.1154	22.846	0.0701	3.2843	93.5492	6.3225	8.1129	5.5294	1.49119	141.94	1.365	0.64	18.2	18.67	0.01	3	64.43	5.53	5.82	5.32	1.46	135	2	0.897	19.3584	21.4572	0.3999	2.8693	60.0046	6.1019	5.87766	5.3801	1.40874	138.732	0.7689
H0560	0.872367	23.8079	20.9877	0.169	1.88453	59.2779	6.57813	6.99685	5.46983	1.51664	155.224	1.37797	0.8301	26.4954	21.846	0.0971	2.7843	69.6892	6.9525	8.5529	5.6594	1.54119	161.94	1.365	0.96	22.1	20.33	0.17	2	55.2	6.64	6.42	5.48	1.55	155	1	0.827	22.8284	20.7872	0.2399	0.8693	52.9446	6.1419	6.01766	5.2701	1.45874	148.732	1.7689
H0561	0.929033	23.5546	20.1011	0.656667	1.38453	67.2613	6.93813	7.27019	5.76983	1.61998	155.224	1.7113	0.6901	21.5854	19.846	0.0701	1.2843	52.1892	6.5725	7.1329	5.7894	1.58119	146.94	2.365	1.03	23.96	19	1.17	1.5	78.12	7.06	7.46	5.76	1.69	160	1	1.067	25.1184	21.4572	0.7299	1.3693	71.4746	7.1819	7.21766	5.7601	1.58874	158.732	1.7689
H0562	0.9157	21.7213	24.3244	1.1	2.71787	55.2079	6.21147	7.48685	5.35983	1.54664	143.557	1.7113	0.8901	21.5054	23.846	2.0601	2.7843	58.9992	6.7725	9.7629	5.3694	1.57119	141.94	2.365	0.95	22.35	23.67	0.34	2.5	47.59	5.83	6.56	5.44	1.59	140	1	0.907	21.3084	25.4572	0.8999	2.8693	59.0346	6.0319	6.13766	5.2701	1.47874	148.732	1.7689
H0563	0.8657	23.8646	21.6544	0.274333	2.0512	59.7046	5.81147	6.90352	5.35317	1.60331	153.557	1.7113	0.8701	26.7554	22.846	0.0831	1.2843	48.9292	5.0825	7.2429	5.2594	1.58119	146.94	0.365	0.89	21.59	21.33	0.34	2	64.58	6.2	6.85	5.44	1.66	160	2	0.837	23.2484	20.7872	0.3999	2.8693	65.6046	6.1519	6.61766	5.3601	1.56874	153.732	2.7689
H0564	0.8157	24.9113	20.4344	0.773333	2.21787	53.0813	6.2448	6.44352	5.41983	1.55998	145.224	1.37797	0.5401	24.2954	19.846	1.4101	2.7843	48.6392	5.9625	6.2329	5.4694	1.52119	151.94	-0.635	0.92	26.25	20.67	0.34	2	59.74	6.08	6.57	5.39	1.61	145	2	0.987	24.1884	20.7872	0.5699	1.8693	50.8646	6.6919	6.52766	5.4001	1.54874	138.732	2.7689
H0565	0.902367	25.1913	22.5477	1.59767	2.0512	54.4813	8.16813	9.18352	6.25317	1.72331	146.891	1.04463	0.7801	24.4654	22.846	2.3931	1.7843	61.7492	8.6225	11.5229	6.5694	1.78119	126.94	2.365	0.95	25.4	22.67	1.17	3	50.03	8.14	8.18	6.18	1.73	155	1	0.977	25.7084	22.1272	1.2299	1.3693	51.6646	7.7419	7.84766	6.0101	1.65874	158.732	-0.2311
H0568	0.999033	23.0179	22.5477	1.32	2.21787	64.2579	6.25147	7.17019	5.82983	1.59998	148.557	1.7113	0.9701	23.0254	23.846	2.0601	2.2843	59.2292	6.5525	7.3629	5.9394	1.60119	141.94	-0.635	0.95	22.44	22.67	1.17	2	62.08	6.11	7.29	5.86	1.65	150	2	1.077	23.5884	21.1272	0.7299	2.3693	71.4646	6.0919	6.85766	5.6901	1.54874	153.732	3.7689
H0569	0.802367	22.8779	19.8777	0.283333	2.5512	53.2079	5.69147	7.71352	5.6765	1.49664	136.891	1.7113	0.9201	26.8354	20.846	0.1101	2.2843	63.6392	6.1225	11.0929	6.1094	1.61119	146.94	0.365	0.72	20.15	20	0.17	2	56.18	5.34	6.09	5.5	1.47	145	2	0.767	21.6484	18.7872	0.5699	3.3693	39.8046	5.6119	5.95766	5.4201	1.40874	118.732	2.7689
H0572	0.709033	19.6879	19.3244	0.216667	2.5512	49.4013	6.73813	6.99685	5.65317	1.59331	140.224	1.37797	0.5801	17.0954	18.846	0.0701	2.2843	48.4492	7.2125	7.4129	5.7794	1.62119	156.94	-0.635	0.68	20.32	20	0.01	2.5	43.08	6.08	6.56	5.46	1.6	130	2	0.867	21.6484	19.1272	0.5699	2.8693	56.6746	6.9219	7.01766	5.7201	1.55874	133.732	2.7689
H0574	0.849033	22.0013	21.2111	2.98433	2.21787	66.2079	6.39813	7.54685	5.25317	1.63664	140.224	1.37797	0.7501	19.3854	18.846	3.3931	1.7843	70.4792	7.1025	9.7329	5.3694	1.67119	151.94	3.365	0.86	22.01	25	2.33	2.5	64.89	5.53	5.95	4.81	1.64	130	1	0.937	24.6084	19.7872	3.2299	2.3693	63.2546	6.5619	6.95766	5.5801	1.59874	138.732	-0.2311
H0575	1.20903	23.8946	19.8811	0.384333	2.88453	68.6213	7.10813	7.71352	6.07983	1.63331	156.891	1.04463	1.0101	22.7754	18.846	0.0831	2.7843	59.0292	6.9325	8.4229	6.4994	1.64119	151.94	-0.635	1.38	25.4	19.67	0.34	3	75.49	7.64	7.81	5.94	1.74	170	2	1.237	23.5084	21.1272	0.7299	2.8693	71.3446	6.7519	6.90766	5.8001	1.51874	148.732	1.7689
H0576	0.8457	23.6379	18.6544	0.16	2.5512	54.6879	5.9648	7.47352	6.24983	1.44998	148.557	1.37797	0.7001	25.8154	17.846	0.0701	1.7843	46.1392	5.7225	8.3529	6.4994	1.37119	161.94	1.365	0.76	22.01	17.33	0.17	3.5	58.39	5.56	6.62	5.9	1.48	140	1	1.077	23.0884	20.7872	0.2399	2.3693	59.5346	6.6119	7.44766	6.3501	1.49874	143.732	1.7689
H0577	1.03903	21.2146	20.8777	0.987667	2.38453	62.5179	7.02147	7.78685	5.73983	1.69331	138.557	1.37797	0.9201	17.8654	20.846	0.7331	2.2843	67.8292	6.5625	8.2829	5.8294	1.67119	131.94	3.365	1.17	25.4	19	1.33	3	67.93	7.2	7.7	5.81	1.74	155	1	1.027	20.3784	22.7872	0.8999	1.8693	51.7946	7.3019	7.37766	5.5801	1.66874	128.732	-0.2311
H0578	0.9157	23.2746	21.2144	0.389	1.0512	66.1179	6.55813	7.86019	5.51317	1.65664	154.366	1.37797	0.7701	25.4854	21.846	0.0971	0.7843	50.9292	5.2125	8.4729	5.2194	1.56119	NA	2.365	1.06	22.44	23.67	0.17	1	92.28	5.81	6.48	5.18	1.64	165	2	0.917	21.8984	18.1272	0.8999	1.3693	55.1446	8.6519	8.62766	6.1401	1.76874	143.732	-0.2311
H0579	1.2157	21.3246	24.2144	0.27	2.0512	73.7113	6.44147	6.85019	5.44983	1.65664	144.366	2.04463	1.3901	23.0254	25.846	0.0701	1.7843	77.8992	6.1325	6.6529	5.3594	1.68119	NA	1.365	1.06	19.39	22.67	0.17	3.5	90.85	7.29	7.38	5.8	1.7	145	2	1.197	21.5584	24.1272	0.5699	0.8693	52.3846	5.9019	6.51766	5.1901	1.58874	143.732	2.7689
H0580	0.932367	22.0879	22.5444	0.937667	1.88453	58.9813	7.12813	8.15685	5.7465	1.66331	141.866	2.04463	0.9401	20.6554	22.846	0.0831	2.2843	49.7692	5.9225	9.8429	5.9294	1.64119	NA	1.365	0.81	25.4	19.33	2.33	1	55.58	8.71	7.75	5.62	1.8	145	2	1.047	20.2084	25.4572	0.3999	2.3693	71.5946	6.7519	6.87766	5.6901	1.54874	138.732	2.7689
H0581	0.929033	23.9179	19.7677	1.70667	2.21787	66.3879	9.26813	8.77352	6.16317	1.80331	143.557	1.37797	0.7401	23.6154	18.846	3.0601	2.7843	62.0092	8.4825	9.2329	6.2894	1.81119	126.94	-0.635	1.06	21.84	19.67	0.5	2.5	62.36	9.91	8.29	6.05	1.81	155	1	0.987	26.2984	20.7872	1.5599	1.3693	74.7946	9.4119	8.79766	6.1501	1.78874	148.732	3.7689
H0582	0.929033	22.2846	19.6544	0.943333	2.71787	56.3713	7.47147	7.99019	5.8765	1.62998	143.557	0.0446333	0.7701	22.2654	21.846	0.7601	1.7843	42.9692	6.9725	8.7729	5.7394	1.59119	141.94	-0.635	1.02	24.55	19.33	0.67	3.5	65.58	6.67	7.71	6.02	1.69	130	0	0.997	20.0384	17.7872	1.3999	2.8693	60.5646	8.7719	7.48766	5.8701	1.60874	158.732	0.7689
H0583	1.12903	24.6846	21.2111	0.27	2.5512	65.0179	7.0948	8.10019	5.87983	1.65664	141.866	1.04463	0.9301	21.6754	19.846	0.0701	2.2843	48.4092	6.0725	8.8529	5.8394	1.59119	NA	1.365	1.27	24.98	22	0.5	1.5	90.2	8.13	7.82	5.83	1.76	150	1	1.187	27.3984	21.7872	0.2399	3.8693	56.4446	7.0819	7.62766	5.9701	1.61874	133.732	0.7689
H0584	1.16237	23.9213	22.4344	0.994333	3.0512	76.1746	8.00813	8.58685	6.00317	1.71998	144.366	0.7113	1.1701	26.2454	24.846	0.0831	2.2843	53.8292	8.0025	9.9129	6.0594	1.74119	NA	1.365	1.16	20.32	20.33	0.5	3.5	116.22	7.79	7.52	5.92	1.67	145	1	1.157	25.1984	22.1272	2.3999	3.3693	58.4746	8.2319	8.32766	6.0301	1.74874	143.732	-0.2311
H0585	1.0557	19.4579	21.2144	1.21333	3.0512	73.9879	7.7048	7.43352	5.7865	1.64664	141.224	0.7113	1.2701	20.7354	22.846	0.0701	2.7843	79.6392	8.8725	8.7329	6.5594	1.72119	151.94	1.365	0.89	16.93	19.67	3	3.5	90.75	6.42	5.92	4.9	1.6	138	1	1.007	20.7084	21.1272	0.5699	2.8693	51.5746	7.8219	7.64766	5.9001	1.61874	133.732	-0.2311
H0586	1.11903	21.5213	22.3244	1.87567	3.38453	85.0313	8.1448	7.39685	5.71983	1.68664	143.557	1.04463	1.2501	20.9954	23.846	2.7271	2.7843	99.7992	7.7325	7.2429	5.6594	1.70119	146.94	0.365	1.19	23.28	21	0.67	4	74.08	9.78	8.67	6.46	1.78	150	2	0.917	20.2884	22.1272	2.2299	3.3693	81.2146	6.9219	6.27766	5.0401	1.57874	133.732	0.7689
H0587	1.06903	22.7346	21.5444	0.442333	2.71787	57.0846	8.5348	7.90685	6.19317	1.71998	136.891	1.04463	1.0701	25.1454	22.846	0.0971	2.2843	40.5392	9.4325	8.1529	6.5794	1.79119	136.94	-0.635	1.09	19.47	21.33	0.17	3	72.51	7.85	7.58	5.75	1.73	140	1	1.047	23.5884	20.4572	1.0599	2.8693	58.2046	8.3219	7.98766	6.2501	1.63874	133.732	2.7689
H0588	1.1057	23.0446	23.3211	1.16567	2.21787	72.8546	7.6948	8.27352	5.95983	1.70331	140.224	1.7113	1.2201	23.9554	22.846	0.0971	1.7843	59.8292	6.4525	9.2629	5.7494	1.75119	151.94	-0.635	0.78	20.74	20.33	2.67	3.5	100.54	8.55	7.86	6.34	1.66	125	3	1.317	24.4384	26.7872	0.7299	1.3693	58.1946	8.0819	7.69766	5.7901	1.69874	143.732	2.7689
H0589	1.1657	22.2846	21.6577	3.20767	3.21787	82.5113	8.1248	8.03019	6.10317	1.68998	141.891	1.7113	1.4501	23.0254	20.846	3.3931	3.2843	59.2392	7.7525	8.6729	6.3294	1.71119	136.94	-0.635	0.94	20.91	22.67	2.67	2.5	83.4	7.66	7.23	5.69	1.68	145	2	1.107	22.9184	21.4572	3.5599	3.8693	104.895	8.9619	8.18766	6.2901	1.67874	143.732	3.7689
H0590	1.1157	21.7779	21.6577	1.70567	3.0512	63.9279	6.9448	7.59685	5.49317	1.62331	138.557	1.7113	1.0901	19.3854	19.846	2.7271	1.7843	69.5892	7.5325	9.2329	5.5594	1.63119	141.94	-0.635	1.09	22.27	24	0.83	3.5	59.82	6.03	6.38	5.32	1.61	140	2	1.167	23.6784	21.1272	1.5599	3.8693	62.3746	7.2719	7.17766	5.6001	1.62874	133.732	3.7689
H0591	1.0657	21.8879	21.9911	0.715667	3.21787	77.8513	7.1248	7.10352	5.61317	1.66331	148.557	2.04463	0.9301	19.1354	20.846	0.7471	2.7843	63.8792	6.6125	6.9629	5.6794	1.64119	161.94	1.365	1.26	25.82	23	0.5	3.5	112.23	7.65	7.1	5.6	1.67	140	2	1.007	20.7084	22.1272	0.8999	3.3693	57.4446	7.1119	7.24766	5.5601	1.67874	143.732	2.7689
H0592	1.4457	25.9513	24.3211	0.335667	1.88453	96.1346	8.02813	8.49019	5.95983	1.72331	156.891	1.7113	1.7301	28.5254	25.846	0.0971	2.7843	82.5092	8.2025	9.3829	5.8594	1.73119	151.94	0.365	1.21	23.28	22.33	0.34	1	75.63	6.9	8.21	6.15	1.74	165	1	1.397	26.0484	24.7872	0.5699	1.8693	130.265	8.9819	7.87766	5.8701	1.69874	153.732	3.7689
H0593	1.0757	23.5546	21.3244	0.499	1.38453	64.8013	7.39147	8.51352	6.1265	1.70331	150.224	1.37797	0.8501	22.9454	21.846	0.0971	1.2843	62.3092	6.7425	9.4329	6.1494	1.73119	126.94	0.365	1.23	24.13	22	0.17	1.5	73.84	7.4	7.47	5.92	1.66	170	1	1.147	23.5884	20.1272	1.2299	1.3693	58.2546	8.0319	8.63766	6.3101	1.71874	153.732	2.7689
H0594	1.10237	24.4013	21.1011	0.389	2.21787	62.3246	7.92147	7.46685	5.7665	1.57998	156.891	0.7113	1.1901	24.4654	22.846	0.0971	1.7843	79.2492	8.7525	7.9329	5.5294	1.54119	141.94	-0.635	1.05	24.13	20.33	0.17	3	55.3	7.84	7.32	5.95	1.63	170	0	1.067	24.6084	20.1272	0.8999	1.8693	52.4246	7.1719	7.14766	5.8201	1.56874	158.732	2.7689
H0595	0.709033	20.3079	18.4344	0.274333	2.71787	46.4579	6.88813	7.36685	5.65317	1.55331	133.557	1.04463	0.4301	19.9754	17.846	0.0831	3.2843	40.8792	6.6325	8.6629	5.9394	1.49119	126.94	1.365	0.74	16.51	17.67	0.17	2	61.12	6.78	6.61	5.23	1.66	135	1	0.957	24.4384	19.7872	0.5699	2.8693	37.3746	7.2519	6.82766	5.7901	1.50874	138.732	0.7689
H0596	0.972367	21.1279	20.7677	0.442333	2.21787	67.6546	7.59813	8.31019	5.65983	1.67331	136.891	1.37797	0.8701	20.1454	21.846	0.0971	1.7843	70.7692	8.2025	10.5129	5.7894	1.72119	121.94	0.365	1.18	25.4	23	0.17	2.5	84.88	6.93	7.4	5.86	1.65	165	1	0.867	17.8384	17.4572	1.0599	2.3693	47.3146	7.6619	7.01766	5.3301	1.64874	123.732	2.7689
H0597	0.9957	23.9779	22.3244	1.051	2.0512	61.7346	6.95147	7.73685	5.93317	1.65664	145.224	0.7113	0.8901	26.5854	20.846	0.0831	2.7843	44.6292	6.2925	8.4629	6.2294	1.67119	116.94	1.365	1.03	21.59	23.67	2.67	1.5	68.72	7.18	7.03	5.58	1.66	160	0	1.067	23.7584	22.4572	0.3999	1.8693	71.8546	7.3819	7.71766	5.9901	1.63874	158.732	0.7689
H0598	0.879033	20.3946	20.5444	1.88	2.71787	50.6879	7.2548	8.12685	5.68317	1.66331	141.891	1.04463	0.6701	20.0654	20.846	1.4101	1.7843	40.3892	5.0525	8.8529	5.4394	1.55119	131.94	2.365	1.07	19.9	18.33	2.67	2.5	73.81	8.77	7.95	5.94	1.75	150	0	0.897	21.2184	22.4572	1.5599	3.8693	37.8646	7.9419	7.57766	5.6701	1.68874	143.732	0.7689
H0599	1.0057	19.7146	21.1011	0.503333	2.88453	54.7013	7.65813	8.03019	5.8965	1.64331	145.224	1.04463	0.8301	17.2654	18.846	0.1101	3.2843	55.2692	8.2225	9.3729	6.0894	1.65119	141.94	2.365	1.29	25.82	26	0.5	3	70.93	6.83	7.38	5.84	1.66	160	1	0.897	16.0584	18.4572	0.8999	2.3693	37.9046	7.9219	7.33766	5.7601	1.61874	133.732	-0.2311
H0603	1.06903	19.3213	23.3211	0.773333	1.71787	63.6879	6.13813	6.96019	5.70317	1.53664	135.224	1.04463	1.1101	17.1854	22.846	0.7601	2.7843	62.1192	6.2925	7.6329	5.7894	1.53119	121.94	1.365	1.02	19.05	22.33	0.5	1	83.28	6.01	6.69	5.72	1.56	150	1	1.077	21.7284	24.7872	1.0599	1.3693	45.6646	6.1119	6.55766	5.6001	1.51874	133.732	0.7689
H0604	1.12903	22.5379	21.1011	0.613333	3.0512	64.4379	7.8948	8.18352	6.3065	1.64664	138.557	1.04463	1.1501	20.1454	20.846	0.1101	2.7843	65.7792	7.9525	8.9829	6.5294	1.68119	141.94	2.365	1.17	24.55	20.33	0.67	2.5	76.42	7.95	7.72	6.17	1.65	150	1	1.067	22.9184	22.1272	1.0599	3.8693	51.1146	7.7819	7.84766	6.2201	1.60874	123.732	-0.2311
H0608	0.8357	22.2313	19.2111	2.431	2.21787	60.4813	6.47147	6.96352	5.35317	1.61331	143.557	1.04463	0.5701	20.4054	17.846	3.3931	2.7843	55.3792	5.7825	7.4929	5.3294	1.61119	131.94	2.365	0.95	23.88	19.33	2	1.5	69.78	6.5	6.6	5.32	1.63	145	1	0.987	22.4084	20.4572	1.8999	2.3693	56.2846	7.1319	6.79766	5.4101	1.59874	153.732	-0.2311
H0609	1.36903	25.1346	23.2111	0.499	2.5512	91.4013	7.6748	7.92019	5.72317	1.72331	146.891	1.37797	1.6601	29.5454	24.846	0.0971	2.2843	86.7692	7.9525	8.7629	5.7494	1.77119	136.94	2.365	1.35	25.15	23	0.83	2.5	114.33	7.94	7.81	5.8	1.77	150	1	1.097	20.7084	21.7872	0.5699	2.8693	73.1046	7.1319	7.18766	5.6201	1.62874	153.732	0.7689
H0612	1.42237	27.3913	23.3211	1.48433	3.0512	86.1746	7.13813	7.77352	5.96983	1.68331	149.366	1.7113	1.3801	28.6954	23.846	2.3931	2.7843	94.4392	7.3025	7.8129	5.9994	1.69119	NA	3.365	1.8	27.09	21.33	1.33	3	103.94	7.39	8.13	6.09	1.75	145	1	1.087	26.3884	24.7872	0.7299	3.3693	60.1446	6.7219	7.37766	5.8201	1.60874	153.732	0.7689
H0613	1.16903	25.7013	21.8811	1.15333	1.71787	74.5379	7.73813	8.12685	6.1765	1.63998	148.557	1.37797	1.4701	27.6854	20.846	2.0601	2.2843	91.3492	8.5725	9.7329	6.6794	1.75119	146.94	3.365	0.97	24.13	19.67	0.67	2	60.09	7.69	7.55	5.98	1.64	145	1	1.067	25.2884	25.1272	0.7299	0.8693	72.1746	6.9519	7.09766	5.8701	1.52874	153.732	-0.2311
H0614	1.17237	23.5246	22.3211	3.09567	2.38453	54.0713	10.0748	9.35685	6.2165	1.91331	148.557	1.04463	1.4701	23.6154	21.846	3.7271	1.7843	58.9592	10.8525	10.0529	6.2494	2.02119	141.94	-0.635	0.95	22.44	20.33	3.33	3	53.62	10.59	9.21	6.21	1.93	160	1	1.097	24.5184	24.7872	2.2299	2.3693	49.6346	8.7819	8.80766	6.1901	1.78874	143.732	2.7689
H0615	0.872367	27.1113	20.4344	1.98433	2.71787	83.4246	7.99147	7.61685	6.1365	1.62664	133.557	1.04463	0.7901	28.6954	20.846	2.3931	2.7843	85.4592	9.5225	8.4429	6.6094	1.74119	106.94	3.365	1.05	27.01	17.33	2.33	3	94.33	7.24	7.09	5.88	1.58	145	0	0.777	25.6284	23.1272	1.2299	2.3693	70.4846	7.2119	7.31766	5.9201	1.55874	148.732	-0.2311
H0618	0.8857	27.4746	22.5444	2.37433	1.0512	42.9913	7.39147	7.40685	5.75317	1.71998	145.224	1.37797	0.9001	29.0354	23.846	3.3931	1.7843	43.8292	7.1325	6.4529	5.5594	1.71119	141.94	0.365	0.81	27.09	23	0.83	0.5	25.81	8.29	8.31	6.08	1.79	140	3	0.947	26.2984	20.7872	2.8999	0.8693	59.3346	6.7519	7.45766	5.6201	1.65874	153.732	0.7689
H0619	1.18903	27.7613	23.2111	0.665667	1.0512	73.8046	6.24813	6.92352	4.92317	1.63331	141.891	1.04463	1.6201	32.0854	25.846	0.0971	1.7843	100.729	6.7325	8.3229	5.0894	1.59119	121.94	2.365	0.95	25.74	22	1.17	1	54.7	5.95	6.13	4.9	1.65	150	0	0.997	25.4584	21.7872	0.7299	0.3693	65.9846	6.0619	6.31766	4.7801	1.65874	153.732	0.7689
H0621	0.942367	25.0513	19.8811	2.20767	1.5512	50.3046	9.04147	8.56685	5.76983	1.80664	143.557	0.377967	0.6301	24.3854	19.846	2.3931	0.7843	39.2092	7.5725	7.3729	5.0894	1.54119	146.94	-0.635	1.01	25.23	19.67	2.67	1.5	44.63	9.61	9	6.1	1.92	130	1	1.187	25.5384	20.1272	1.5599	2.3693	67.0746	9.9419	9.32766	6.1201	1.95874	153.732	0.7689
H0623	1.18237	25.5013	19.8777	2.54	2.0512	67.0279	9.32813	9.11352	6.53983	1.78998	148.557	0.377967	1.1201	23.1954	18.846	3.0601	2.2843	60.8692	9.6925	9.6429	6.8194	1.84119	141.94	1.365	1.18	27.09	20.33	2	1.5	71.55	8.94	8.75	6.4	1.78	145	0	1.247	26.2184	20.4572	2.5599	2.3693	68.6646	9.3519	8.94766	6.4001	1.74874	158.732	-0.2311
H0624	0.7857	24.2046	19.9911	3.209	0.0512	50.8079	5.8748	6.92019	4.7665	1.62998	130.224	1.37797	0.6901	25.3154	21.846	3.7271	-0.2157	64.4292	5.5325	7.8829	4.5894	1.47119	96.9402	-0.635	0.83	26.25	23	3	0	36.25	5.95	6.47	5.03	1.7	145	2	0.837	21.0484	15.1272	2.8999	0.3693	51.7446	6.1419	6.40766	4.6801	1.71874	148.732	2.7689
H0629	1.3157	24.9379	21.5444	2.65333	2.88453	67.5379	7.92813	8.76019	5.98983	1.78998	141.891	1.04463	1.4101	23.2754	19.846	3.0601	2.2843	55.7592	7.6625	9.8329	5.9994	1.81119	136.94	2.365	1.25	23.71	21.33	2.67	3.5	84.38	8.43	8.13	5.93	1.81	145	0	1.287	27.8284	23.4572	2.2299	2.8693	62.4746	7.6919	8.31766	6.0401	1.74874	143.732	0.7689
H0630	1.33903	24.2846	22.6577	0.326667	2.88453	58.2846	8.49147	8.79685	6.45317	1.66998	155.224	1.04463	1.3901	27.2554	22.846	0.0701	2.2843	48.6392	8.2525	10.2529	6.8594	1.68119	166.94	2.365	1.38	22.01	21	0.34	3.5	67.63	9.02	8.13	6.23	1.69	150	1	1.247	23.5884	24.1272	0.5699	2.8693	58.5846	8.2019	8.00766	6.2701	1.63874	148.732	-0.2311
H0631	0.7657	23.7213	16.2144	0.16	0.384533	29.1813	8.09147	8.94019	6.02317	1.89331	141.891	2.04463	0.5601	20.6554	14.846	0.0701	-0.2157	38.4492	6.9225	8.6229	5.8394	1.84119	141.94	-0.635	0.66	27.09	16.67	0.01	0.5	10.03	8.87	8.96	5.92	1.98	145	3	1.077	23.4184	17.1272	0.3999	0.8693	39.0646	8.4819	9.23766	6.3101	1.85874	138.732	3.7689
H0633	1.1757	25.1346	18.6577	1.821	1.5512	56.8479	6.80147	8.69685	6.2465	1.75998	124.366	2.04463	1.0501	26.6654	20.846	2.3931	1.7843	41.6092	6.0925	9.6829	6.5094	1.83119	NA	2.365	1.29	23.28	18.67	1.67	1.5	74	7.9	8.58	6.21	1.81	130	1	1.187	25.4584	16.4572	1.3999	1.3693	54.9346	6.4119	7.82766	6.0201	1.63874	118.732	2.7689
H0634	1.1057	23.5279	18.6577	0.437667	2.21787	52.5479	7.63147	8.41352	5.8265	1.74331	128.557	0.7113	0.9701	19.3854	16.846	0.0831	3.2843	38.0792	7.1725	9.9329	5.9194	1.79119	161.94	-0.635	1.08	23.71	18	0.17	1.5	53.9	7.93	7.71	5.77	1.77	110	0	1.267	27.4884	21.1272	1.0599	1.8693	65.6646	7.7919	7.59766	5.7901	1.66874	113.732	2.7689
H0635	1.00903	24.3146	18.1011	0.546667	2.38453	32.5079	7.62147	8.07352	5.9965	1.81664	141.891	1.37797	0.5301	20.6554	15.846	0.0701	2.7843	35.6592	4.6425	6.0629	5.5594	1.71119	166.94	-0.635	1.18	28.36	20.33	1.17	3	18.52	9.71	9.01	6.19	1.9	135	2	1.317	23.9284	18.1272	0.3999	1.3693	43.3446	8.5119	9.14766	6.2401	1.83874	123.732	2.7689
H0636	1.1457	21.8313	19.5444	2.98567	0.884533	58.9179	7.05813	9.48352	5.78317	1.71331	148.557	1.37797	1.1101	21.0754	19.846	2.7271	0.7843	46.3292	6.7025	12.8729	5.4694	1.74119	161.94	0.365	1.13	21.59	19.33	2.67	0	90.39	6.25	7.09	5.63	1.67	145	1	1.197	22.8284	19.4572	3.5599	1.8693	40.0346	8.2219	8.48766	6.2501	1.72874	138.732	2.7689
H0641	1.0257	26.3179	21.3244	0.437667	0.717867	31.9613	8.06147	7.96019	5.4465	1.87664	115.224	1.04463	1.1001	27.0854	23.846	0.0831	0.7843	40.5192	6.5225	7.2729	5.2294	1.81119	81.9402	3.365	0.97	27.18	20	0.83	0.5	20.48	9.29	8.47	5.59	1.98	150	0	1.007	24.6884	20.1272	0.3999	0.8693	34.8846	8.3719	8.13766	5.5201	1.83874	113.732	-0.2311
H0642	1.04237	25.2446	18.2144	0.719	2.71787	53.8746	7.03813	7.28685	5.41983	1.67331	141.866	1.37797	0.9501	21.5854	15.846	0.0971	2.7843	50.8292	7.2425	8.3329	5.5894	1.78119	NA	2.365	1.07	25.82	20.67	0.83	2.5	70.58	7.14	6.9	5.39	1.67	155	1	1.107	28.3284	18.1272	1.2299	2.8693	40.2146	6.7319	6.62766	5.2801	1.56874	128.732	0.7689
H0644	1.07903	28.5779	21.3211	0.717667	1.21787	41.0079	10.6781	9.66352	6.2965	2.00664	150.224	1.04463	0.9001	30.1354	22.846	0.0831	1.2843	40.3992	8.5325	8.8929	6.2094	1.96119	151.94	1.365	1.13	26.59	21.33	0.67	1	37.68	11.79	9.81	6.29	2.04	160	1	1.207	29.0084	19.7872	1.3999	1.3693	44.9446	11.7119	10.2877	6.3901	2.01874	138.732	0.7689
H0645	1.10903	27.7579	21.8811	1.771	1.38453	63.5546	8.24813	9.16352	5.9465	1.76331	143.557	1.04463	1.1601	31.2354	21.846	1.7431	1.7843	65.7492	9.5025	11.4929	5.9394	1.85119	156.94	1.365	1.11	24.98	22.67	1.67	1.5	80.35	7.44	7.87	5.89	1.74	150	1	1.057	27.0584	21.1272	1.8999	0.8693	44.5646	7.8019	8.12766	6.0101	1.69874	123.732	0.7689
H0646	1.11903	27.6179	21.6577	0.494333	0.884533	38.7379	5.28147	7.62019	5.72317	1.78331	143.557	1.7113	0.9201	25.7354	18.846	0.0831	0.7843	39.1792	4.4425	6.9929	5.5994	1.79119	121.94	0.365	1.14	26.25	22.67	0.5	0.5	31.08	5.22	7.8	5.87	1.77	165	2	1.297	30.8684	23.4572	0.8999	1.3693	45.9546	6.1819	8.06766	5.7001	1.78874	143.732	2.7689
H0647	1.04237	23.0746	21.2111	0.45	2.0512	51.1379	7.56147	8.34019	5.9765	1.71331	154.366	1.04463	0.9901	21.1654	20.846	0.1101	2.7843	45.0492	7.6625	9.0029	6.0294	1.68119	NA	-0.635	1.1	24.13	22.33	0.67	1.5	63.49	7.53	7.94	5.92	1.75	170	1	1.037	23.9284	20.4572	0.5699	1.8693	44.8746	7.4919	8.07766	5.9801	1.70874	138.732	2.7689
H0648	1.2957	29.9313	23.5444	0.384333	0.884533	76.6946	7.49813	7.81352	5.51983	1.60664	141.891	1.37797	1.4601	31.2354	21.846	0.0831	0.7843	71.7692	7.9325	8.6129	5.0894	1.49119	121.94	2.365	1.08	27.09	24	0.34	1	95.46	7.11	7.35	5.73	1.68	160	1	1.347	31.4684	24.7872	0.7299	0.8693	62.8546	7.4519	7.47766	5.7401	1.64874	143.732	0.7689
H0649	0.932367	22.0846	19.7677	2.76567	1.5512	60.6646	7.3048	7.61352	5.93983	1.66664	128.557	1.04463	0.7701	22.1754	19.846	2.7271	1.7843	43.8292	5.8925	7.4229	5.8394	1.66119	121.94	2.365	0.8	19.56	18.33	2.67	1	71.18	7.77	7.52	5.9	1.68	135	1	1.227	24.5184	21.1272	2.8999	1.8693	66.9846	8.2519	7.89766	6.0801	1.65874	128.732	-0.2311
H0650	0.929033	26.9946	19.1011	0.613333	2.5512	56.2779	7.7748	8.55685	6.3365	1.65664	141.891	1.04463	0.6201	23.6154	19.846	0.1101	2.7843	39.1092	5.5125	7.6729	5.7994	1.47119	136.94	1.365	0.97	29.63	18.67	0.5	2	63.67	10.19	9.47	6.79	1.82	145	1	1.197	27.7384	18.7872	1.2299	2.8693	66.0546	7.6219	8.52766	6.4201	1.67874	143.732	0.7689
H0651	1.17903	23.7813	22.2144	2.20767	1.5512	78.0046	8.14813	7.66352	5.59317	1.75331	141.891	1.37797	1.1601	23.0254	23.846	2.3931	2.2843	61.7292	8.3625	7.7429	5.7494	1.75119	136.94	-0.635	1.19	24.98	20.67	2.33	1.5	104.99	7.14	7.49	5.67	1.72	155	2	1.187	23.3384	22.1272	1.8999	0.8693	67.2946	8.9419	7.75766	5.3601	1.78874	133.732	2.7689
H0652	1.32903	26.8846	19.9877	2.48433	2.38453	76.7413	8.03813	9.10019	6.3965	1.73998	151.891	1.37797	1.4201	27.0054	20.846	3.3931	2.7843	73.0292	7.9325	10.8929	6.7094	1.83119	156.94	2.365	1.28	26.67	18.33	2.33	2.5	77.43	8.11	8.2	6.31	1.7	150	2	1.287	26.9784	20.7872	1.7299	1.8693	79.7646	8.0719	8.20766	6.1701	1.68874	148.732	-0.2311
H0653	1.19237	28.0979	20.1011	1.491	1.21787	97.1279	8.7548	8.41352	5.57983	1.86998	133.557	1.37797	1.4801	30.8954	20.846	1.7431	1.7843	74.2892	9.2125	9.7029	5.7894	1.96119	121.94	1.365	1.07	26.67	20.67	1	0.5	133.88	9.47	8.18	5.63	1.9	145	2	1.027	26.7284	18.7872	1.7299	1.3693	83.2146	7.5819	7.35766	5.3201	1.74874	133.732	0.7689
H0655	1.18237	23.4446	22.9911	0.439	2.71787	78.5946	7.73147	8.79352	5.97983	1.63331	140.224	1.04463	1.4601	25.3154	22.846	0.7471	2.7843	59.2192	7.9225	12.2329	6.3094	1.75119	146.94	3.365	0.99	23.88	23.67	0.17	2.5	95.78	7.6	7.23	5.87	1.62	130	0	1.097	21.1384	22.4572	0.3999	2.8693	80.7846	7.6719	6.91766	5.7601	1.52874	143.732	-0.2311
H0656	0.989033	21.4679	17.8777	3.319	3.0512	42.9779	10.0881	7.96019	6.0465	1.83998	123.557	1.37797	0.8301	20.0654	17.846	3.7271	2.7843	40.7692	9.2725	6.7529	5.8494	1.87119	116.94	-0.635	0.91	21.76	18	2.33	3	38.47	10.61	8.73	6.2	1.87	130	2	1.227	22.5784	17.7872	3.8999	3.3693	49.6946	10.3819	8.39766	6.0901	1.77874	123.732	2.7689
H0657	0.7557	23.9813	20.5444	2.26567	2.5512	52.8779	6.3748	7.49019	6.24983	1.52331	118.557	1.04463	0.6201	25.4854	21.846	2.7271	3.2843	50.6192	6.7625	9.2729	6.7294	1.68119	126.94	3.365	0.7	22.44	19	2.67	2.5	57.09	6.3	6.87	6.17	1.48	110	0	0.947	24.0184	20.7872	1.3999	1.8693	50.9246	6.0619	6.32766	5.8501	1.40874	118.732	-0.2311
H0659	0.982367	21.6646	20.5444	1.15667	3.88453	39.6646	4.9048	6.60685	5.16983	1.62998	129.366	0.0446333	0.6301	20.4054	17.846	0.0701	3.2843	35.9792	-0.1975	5.9729	4.8594	1.52119	NA	-0.635	1.05	21.42	20	0.17	4	25.06	6.8	6.6	5.24	1.67	125	0	1.267	23.1684	23.7872	3.2299	4.3693	57.9546	8.1119	7.24766	5.4101	1.69874	133.732	0.7689
H0660	0.7457	21.4346	19.9911	0.83	1.0512	30.7679	8.55147	7.91685	5.7865	1.68331	130.224	0.7113	0.3001	17.0954	18.846	0.7601	-0.2157	36.4192	7.0725	7.4629	5.3594	1.54119	131.94	-0.635	0.73	23.62	20	0.83	0.5	13.89	7.77	7.46	5.79	1.71	130	2	1.207	23.5884	21.1272	0.8999	2.8693	41.9946	10.8119	8.82766	6.2101	1.79874	128.732	0.7689
H0661	0.9857	23.9479	24.2144	2.48667	2.21787	58.9946	7.61813	7.88685	5.83317	1.64998	145.224	0.7113	1.0401	24.2954	22.846	3.0601	1.7843	71.8492	8.9225	9.5129	6.1594	1.70119	141.94	2.365	0.97	22.69	24.67	2.5	2.5	53.76	7.04	7.12	5.76	1.64	150	0	0.947	24.8584	25.1272	1.8999	2.3693	51.3746	6.8919	7.02766	5.5801	1.60874	143.732	-0.2311
H0662	1.11237	21.1279	24.3244	0.213333	3.0512	62.2846	6.78625	7.25645	5.1047	1.60059	125.224	1.04463	1.3701	21.9254	24.846	0.0701	2.2843	59.7292	6.9625	8.1629	4.9994	1.60119	146.94	1.365	1.13	21.76	27	0.17	2.5	90.73	6.61	6.35	5.21	1.6	140	1	0.837	19.6984	21.1272	0.3999	4.3693	36.3946	NA	NA	NA	NA	88.7322	0.7689
H0663	1.17903	20.8746	22.3244	2.15333	3.0512	79.7013	7.1748	7.46019	6.02317	1.59664	126.891	0.7113	1.2701	20.2354	21.846	2.0601	2.2843	66.9492	6.6825	7.2629	5.9394	1.53119	121.94	2.365	1.08	19.05	22	2.67	3	93.32	7.83	7.81	6.17	1.68	140	0	1.187	23.3384	23.1272	1.7299	3.8693	78.8346	7.0119	7.30766	5.9601	1.57874	118.732	-0.2311
H0664	0.969033	22.4279	24.7677	0.106667	3.21787	57.4246	5.33813	7.10352	5.05983	1.50331	125.224	1.37797	1.0801	23.3654	26.846	0.0701	2.2843	64.1592	4.8725	9.8829	5.1594	1.53119	126.94	2.365	0.89	21.17	23	0.01	4	55.85	5.65	5.88	5.01	1.56	135	1	0.937	22.7484	24.4572	0.2399	3.3693	52.2646	5.4919	5.54766	5.0101	1.41874	113.732	0.7689
H0665	0.882367	25.0513	22.4344	1.15667	1.71787	41.9013	5.28147	6.13352	5.02317	1.54998	123.557	1.04463	0.8601	27.8554	22.846	1.4101	2.2843	46.9092	5.3725	6.3029	4.9794	1.52119	151.94	1.365	0.83	25.23	21.67	1.33	0	28.34	5.03	6.08	5.12	1.58	120	1	0.957	22.0684	22.7872	0.7299	2.8693	50.4546	5.4419	6.01766	4.9701	1.54874	98.7322	0.7689
H0667	0.699033	21.6646	18.8777	0.49	1.38453	34.6613	4.8848	6.01685	4.62317	1.51998	131.891	1.04463	0.1801	15.9954	13.846	0.0701	1.7843	35.9892	3.8525	6.7329	4.3994	1.44119	146.94	-0.635	0.99	27.52	21	0.5	1.5	28.44	5.12	5.55	4.72	1.57	135	1	0.927	21.4784	21.7872	0.8999	0.8693	39.5546	5.6819	5.76766	4.7501	1.54874	113.732	2.7689
H0668	1.17903	30.0446	21.5477	0.336667	2.5512	63.8046	6.5448	7.39019	5.87317	1.59331	146.891	1.04463	1.4901	35.8954	23.846	0.1101	2.2843	58.8692	5.9525	7.9829	6.0294	1.60119	156.94	0.365	0.95	29.21	19.67	0.17	1.5	69.22	6.62	7.41	5.99	1.63	155	2	1.097	25.0284	21.1272	0.7299	3.8693	63.3246	7.0619	6.77766	5.6001	1.54874	128.732	0.7689
H0669	1.00903	22.2546	19.2144	2.09767	1.5512	60.3313	7.94813	8.57685	5.60317	1.76664	135.224	1.04463	1.0901	24.4654	19.846	3.3931	2.2843	69.2092	8.4925	10.8129	5.8594	1.81119	141.94	1.365	0.95	19.47	18.67	2	1	50.12	7.82	7.36	5.39	1.78	130	1	0.987	22.8284	19.1272	0.8999	1.3693	61.6646	7.5319	7.55766	5.5601	1.70874	133.732	0.7689
H0670	1.30903	25.6146	23.4344	0.72	3.0512	90.7813	7.4148	7.20352	5.46317	1.71331	130.224	1.7113	1.8101	28.3554	23.846	0.7601	2.7843	86.5292	7.9425	7.9029	5.6094	1.84119	141.94	2.365	1.07	25.4	23.67	0.5	3	100.42	6.94	6.84	5.44	1.67	130	2	1.047	23.0884	22.7872	0.8999	3.3693	85.3946	7.3619	6.86766	5.3401	1.62874	118.732	0.7689
H0676	1.28903	25.7013	20.1011	3.76567	1.0512	57.0279	8.93147	8.22019	5.68317	1.75331	145.224	1.04463	1.7301	26.5854	19.846	3.7271	0.2843	56.3092	10.2525	8.1129	5.1994	1.64119	121.94	0.365	1.16	25.4	19.67	3.67	1.5	66.81	8.59	8.19	5.98	1.8	155	2	0.977	25.1184	20.7872	3.8999	1.3693	47.9646	7.9519	8.35766	5.8701	1.81874	158.732	0.7689
H0677	1.08237	22.5679	20.5444	0.445667	2.88453	53.9879	7.76813	7.37019	5.5465	1.68998	146.891	1.37797	1.1201	21.8454	18.846	0.0971	2.2843	58.0192	7.8725	7.4729	5.4194	1.70119	136.94	1.365	1	23.2	19.33	0.34	3.5	56.79	8.27	7.51	5.74	1.73	160	2	1.127	22.6584	23.4572	0.8999	2.8693	47.1546	7.1619	7.12766	5.4801	1.63874	143.732	0.7689
H0678	1.01237	24.3713	20.9911	3.541	1.88453	54.3346	6.84147	7.05352	5.5265	1.69331	126.891	1.37797	1.0001	25.3154	20.846	3.3931	1.7843	56.7892	6.5025	6.3729	5.5294	1.62119	121.94	2.365	0.94	24.21	19.67	3.33	3	58.66	7.01	7.3	5.49	1.74	135	1	1.097	23.5884	22.4572	3.8999	0.8693	47.5546	7.0119	7.48766	5.5601	1.71874	123.732	0.7689
H0679	1.23237	25.3046	18.6577	1.98333	1.71787	62.7579	8.4048	8.10685	6.19317	1.75664	133.557	1.37797	1.3001	25.3154	19.846	2.0601	2.2843	60.5192	8.5025	7.3929	6.2994	1.70119	121.94	3.365	1.23	24.38	16.67	2.33	1	79.76	8.53	8.41	6.15	1.8	150	1	1.167	26.2184	19.4572	1.5599	1.8693	47.9946	8.1819	8.51766	6.1301	1.76874	128.732	-0.2311
H0680	0.879033	24.5979	18.5477	1.821	2.0512	35.5379	9.8348	8.89019	6.3665	1.88664	141.891	0.377967	0.5401	23.4454	17.846	2.3931	1.7843	41.8092	8.3625	6.8629	5.8594	1.78119	126.94	0.365	1.02	26.42	20.67	1.67	2	23.13	10.53	9.78	6.62	1.94	150	1	1.077	23.9284	17.1272	1.3999	2.3693	41.6746	10.6119	10.0277	6.6201	1.93874	148.732	-0.2311
H0681	1.14237	22.0846	19.7677	0.886667	2.88453	60.6813	8.79813	6.71685	5.5465	1.73331	136.891	1.7113	1.6701	22.8554	21.846	0.7601	1.2843	83.0992	9.5825	5.3329	5.5494	1.75119	141.94	0.365	0.78	20.4	20	1	3	45.89	7.9	7.23	5.5	1.75	140	2	0.977	22.9984	17.4572	0.8999	4.3693	53.0546	8.9119	7.58766	5.5901	1.69874	128.732	2.7689
H0684	1.2757	22.9046	22.8777	2.039	2.5512	59.4713	8.8248	8.16352	6.3565	1.69331	138.557	1.04463	1.5901	24.1254	22.846	2.7271	2.7843	82.1392	10.7425	8.1329	6.2394	1.75119	141.94	1.365	1.09	21	21.33	2.33	2.5	43.86	7.88	8.14	6.39	1.68	140	1	1.147	23.5884	24.4572	1.0599	2.3693	52.4146	7.8519	8.21766	6.4401	1.64874	133.732	0.7689
H0685	1.10237	25.2479	21.2111	1.04667	2.21787	61.3579	7.8248	7.25019	5.40317	1.61998	148.557	2.37797	1.2701	27.5954	22.846	1.4101	1.7843	84.0792	9.1925	6.1629	4.2794	1.48119	166.94	3.365	0.95	24.13	21	0.83	1.5	55.94	5.85	6.69	5.39	1.64	145	1	1.087	24.0184	19.7872	0.8999	3.3693	44.0546	8.4319	8.89766	6.5401	1.73874	133.732	2.7689
H0686	1.1557	23.6946	24.1011	1.26667	2.88453	78.3946	6.8348	7.56352	5.83983	1.50664	136.891	1.04463	1.4901	26.6654	25.846	1.4101	2.7843	77.1092	7.3425	9.2629	5.9094	1.50119	146.94	2.365	0.94	23.28	23	1.33	2.5	82.9	6.39	6.71	5.79	1.54	135	1	1.037	21.1384	23.4572	1.0599	3.3693	75.1746	6.7719	6.71766	5.8201	1.47874	128.732	-0.2311
H0687	1.02237	22.1446	19.7677	0.217667	2.21787	46.1079	7.0422	7.26528	5.80975	1.57496	143.557	1.37797	1.2201	25.3154	22.846	0.0831	2.2843	71.1292	7.0125	7.1929	5.5494	1.61119	146.94	2.365	0.86	20.74	17.67	0.17	2.5	3.08	NA	NA	NA	NA	150	1	0.987	20.3784	18.7872	0.3999	1.8693	64.1146	7.0719	7.33766	6.0701	1.53874	133.732	0.7689
H0692	1.0357	25.5313	21.3244	2.37233	2.5512	75.9979	8.97147	7.93685	6.19983	1.70998	155.224	0.7113	1.0501	27.0054	21.846	2.7271	2.7843	79.3792	9.5625	6.3829	5.8394	1.62119	161.94	1.365	1.11	26.67	23.67	3.33	2.5	88.48	9.1	8.79	6.34	1.8	155	0	0.947	22.9184	18.4572	1.0599	2.3693	60.1346	8.2519	8.63766	6.4201	1.70874	148.732	0.7689
H0695	1.24903	24.2579	21.8777	0.274333	1.88453	78.1846	7.35147	7.34352	5.7265	1.69331	161.891	0.7113	1.2201	20.1454	18.846	0.0831	2.2843	78.4292	8.1725	7.3329	5.9994	1.68119	166.94	0.365	1.32	26.92	22.33	0.5	2	69.62	7.19	7.35	5.55	1.74	160	2	1.207	25.7084	24.4572	0.2399	1.3693	86.5046	6.6919	7.34766	5.6301	1.65874	158.732	-0.2311
H0696	0.879033	25.8113	20.6577	0.613333	2.88453	50.1013	6.64147	6.59352	5.7265	1.52331	145.224	1.04463	0.8501	28.2754	22.846	0.1101	2.7843	55.0792	7.2025	6.0229	5.6994	1.43119	151.94	2.365	0.82	25.82	17.67	0.67	3	45.29	6.46	7.06	5.86	1.6	140	1	0.967	23.3384	21.4572	1.0599	2.8693	49.9346	6.2619	6.69766	5.6201	1.53874	143.732	-0.2311
H0699	1.2357	23.3546	21.9911	0.16	3.0512	59.8213	8.89147	7.37019	5.99983	1.74331	136.891	0.7113	1.0801	20.9054	20.846	0.0701	1.7843	45.1092	8.4125	5.3829	5.9794	1.62119	136.94	0.365	1.31	24.55	22	0.17	3.5	48.48	9.18	8.27	6	1.82	130	1	1.317	24.6084	23.1272	0.2399	3.8693	85.8746	9.0819	8.45766	6.0201	1.78874	143.732	0.7689
H0702	1.33237	28.2413	22.7677	0.217667	2.88453	77.3013	6.86813	7.10019	5.9665	1.67331	138.557	1.7113	1.8001	32.0854	22.846	0.0831	2.2843	67.9292	6.0525	5.4829	6.0294	1.58119	151.94	2.365	1.09	24.98	23	0.17	3	99.4	7.97	8.16	6.07	1.76	135	2	1.107	27.6584	22.4572	0.3999	3.3693	64.5746	6.5819	7.65766	5.8001	1.67874	128.732	0.7689
H0703	1.1557	26.5179	20.8811	1.04667	1.5512	47.6213	8.71147	7.20352	5.31317	1.88331	135.224	1.04463	1.0401	30.6454	21.846	1.4101	1.2843	46.2392	9.1025	5.3929	5.1694	1.78119	151.94	0.365	1.09	23.28	19.67	0.83	1.5	42.11	8.95	8.36	5.49	2	125	2	1.337	25.6284	21.1272	0.8999	1.8693	54.5146	8.0819	7.85766	5.2801	1.86874	128.732	0.7689
H0704	1.1857	21.2679	21.2111	0.274333	1.5512	56.7946	5.91147	6.82019	4.7565	1.69664	135.224	0.7113	0.6901	20.8254	20.846	0.0831	0.7843	38.9192	4.0525	6.2729	4.2594	1.47119	131.94	1.365	1.38	20.32	20	0.17	3	83.41	7.28	7.47	5.19	1.87	135	1	1.487	22.6584	22.7872	0.5699	0.8693	48.0546	6.4019	6.71766	4.8201	1.74874	138.732	-0.2311
H0705	1.11903	23.7513	20.4344	2.20567	3.5512	74.7113	8.60147	7.89019	6.3865	1.73331	140.224	1.7113	1.2901	23.6154	21.846	2.7271	3.7843	83.2692	8.5625	6.5729	6.3394	1.76119	126.94	-0.635	1.08	24.13	21	1.33	3.5	79.73	8.76	8.51	6.44	1.73	145	3	0.987	23.5084	18.4572	2.5599	3.3693	61.1346	8.4819	8.58766	6.3801	1.70874	148.732	2.7689
H0706	1.2757	29.5079	22.8777	1.31767	2.38453	72.8946	8.5548	7.52019	6.24317	1.66664	130.224	1.04463	1.3201	28.6954	22.846	2.3931	2.7843	95.8192	9.7325	6.2129	6.0494	1.68119	121.94	0.365	1.33	29.21	23.33	0.83	2	46.46	8.59	8.75	6.56	1.74	130	2	1.177	30.6184	22.4572	0.7299	2.3693	76.4046	7.3419	7.59766	6.1201	1.57874	138.732	0.7689
H0707	1.08237	23.5813	18.5444	1.051	1.21787	36.7879	7.71813	7.87352	6.18983	1.67998	125.224	1.04463	1.0001	23.6154	18.846	1.0931	1.7843	41.2592	7.1525	6.5929	5.8994	1.57119	131.94	1.365	1.26	25.06	18.33	1	0.5	14.64	7.86	8.51	6.2	1.79	110	1	0.987	22.0684	18.4572	1.0599	1.3693	54.4646	8.1419	8.51766	6.4701	1.67874	133.732	0.7689
H0708	1.07237	23.5546	21.1011	2.261	2.88453	61.5113	8.8048	8.13685	6.05317	1.74331	131.891	2.04463	1.1201	22.6854	20.846	3.3931	1.7843	68.0392	9.0425	7.5529	5.7694	1.72119	126.94	1.365	1.17	24.81	20.33	2.33	3.5	77.59	9.12	8.49	6.33	1.77	135	2	0.927	23.1684	22.1272	1.0599	3.3693	38.9046	8.2519	8.36766	6.0601	1.73874	133.732	2.7689
H0709	1.50237	35.4679	20.8777	2.20767	2.21787	58.8946	9.11813	8.08685	5.78317	1.73331	130.224	1.7113	1.7901	38.0154	23.846	3.3931	2.7843	58.8792	8.6725	7.4329	5.1394	1.64119	136.94	0.365	1.66	36.41	19	2.33	2.5	60.46	10.62	8.75	6.06	1.9	130	2	1.057	31.9784	19.7872	0.8999	1.3693	57.3446	8.0619	8.07766	6.1501	1.65874	123.732	2.7689
H0710	1.11903	25.8379	21.7677	2.76433	1.71787	52.9979	9.41813	7.31685	5.54317	1.70998	135.224	2.37797	1.2401	28.8654	21.846	3.3931	2.2843	63.9092	9.8425	5.7129	4.9494	1.57119	136.94	2.365	1.13	24.13	20	3	1.5	41.14	9.27	7.98	5.82	1.8	130	2	0.987	24.5184	23.4572	1.8999	1.3693	53.9446	9.1419	8.25766	5.8601	1.75874	138.732	2.7689
H0711	0.962367	26.5746	19.3211	0.336667	2.0512	45.7246	7.57813	7.23352	5.9665	1.72331	136.891	0.7113	0.7701	26.6654	18.846	0.1101	2.2843	39.2092	6.4325	5.7729	6.0094	1.72119	131.94	0.365	1.19	27.94	19.33	0.17	2	50.56	7.93	7.83	5.94	1.72	145	1	0.927	25.1184	19.7872	0.7299	1.8693	47.4046	8.3719	8.09766	5.9501	1.72874	133.732	0.7689
H0712	1.20237	23.1879	17.6577	0.824333	1.0512	51.4246	7.83813	7.49685	6.15317	1.71664	146.891	1.04463	1.4701	23.9554	19.846	0.0831	2.2843	66.1092	7.8025	6.4429	6.3894	1.75119	151.94	2.365	1.2	24.98	15.67	1.33	0	45.73	7.94	8.38	6.25	1.73	145	1	0.937	20.6284	17.4572	1.0599	0.8693	42.4346	7.7719	7.66766	5.8201	1.66874	143.732	-0.2311
H0713	0.739033	21.6913	16.8777	2.00333	1.71787	29.8779	6.0748	6.60352	5.51317	1.59998	141.891	0.0446333	-0.1099	14.3054	12.846	0.1101	2.2843	34.8592	3.0325	3.8729	4.3994	1.38119	161.94	-0.635	1.38	26.67	20	2.67	1.5	13.32	8.15	8.38	6.23	1.79	125	0	0.947	24.0984	17.7872	3.2299	1.3693	41.4546	7.0419	7.55766	5.9101	1.62874	138.732	0.7689
H0714	0.8957	26.5479	20.1011	1.98567	1.88453	50.2679	8.1348	7.61019	5.7965	1.65331	161.891	0.0446333	0.7401	28.4454	20.846	2.7271	2.7843	43.6192	6.9925	5.9729	4.9094	1.49119	166.94	-0.635	1.06	28.79	19.33	2.33	1.5	60.08	7.69	7.61	5.87	1.69	155	1	0.887	22.4084	20.1272	0.8999	1.3693	47.1046	9.7219	9.24766	6.6101	1.77874	163.732	-0.2311
H0715	0.9657	27.6713	20.8777	2.04	1.21787	55.3413	7.05147	6.80685	5.7965	1.54998	161.891	0.7113	0.7001	31.0654	20.846	2.0601	1.7843	48.1092	6.5725	5.9829	5.6394	1.47119	161.94	1.365	1.24	28.7	20.33	2.33	0.5	44.67	7.16	7.62	6.17	1.63	155	1	0.957	23.2484	21.4572	1.7299	1.3693	73.2446	7.4219	6.81766	5.5801	1.54874	168.732	-0.2311
H0716	1.3157	24.3713	21.9911	1.05333	2.5512	78.7246	9.1848	8.16019	5.94317	1.71998	161.891	1.04463	1.7701	27.0854	21.846	0.7601	2.7843	104.609	10.5525	8.7729	5.8394	1.75119	191.94	2.365	1.13	22.44	23	0.5	3	65.29	8.67	7.76	5.75	1.79	145	1	1.047	23.5884	21.1272	1.8999	1.8693	66.2746	8.3319	7.94766	6.2401	1.61874	148.732	-0.2311
H0717	1.12903	25.4979	20.1011	2.92767	0.717867	65.2346	8.08813	6.86019	5.59317	1.68998	153.557	1.7113	1.2801	29.9654	20.846	3.3931	1.7843	67.3692	9.1225	6.0329	5.5594	1.72119	171.94	1.365	1.08	23.28	20.33	3.33	0	56.9	7.01	7.16	5.41	1.73	140	1	1.027	23.2484	19.1272	2.0599	0.3693	71.4346	8.1319	7.38766	5.8101	1.61874	148.732	2.7689
H0718	1.21903	24.9379	21.2144	1.32667	2.38453	59.0246	8.5848	7.16685	5.73317	1.74664	150.224	1.04463	1.2701	27.5154	20.846	1.4101	1.7843	65.0092	9.4025	6.5429	5.9294	1.80119	156.94	0.365	1.14	24.13	21.67	0.67	2.5	50.64	9.17	7.86	5.86	1.78	150	2	1.247	23.1684	21.1272	1.8999	2.8693	61.4246	7.1819	7.09766	5.4101	1.65874	143.732	0.7689
H0719	1.06903	26.1779	23.3211	2.321	2.0512	57.3379	8.0948	6.48685	5.63317	1.60998	161.891	1.04463	0.9301	24.7154	20.846	2.3931	1.7843	63.1492	7.9425	4.8429	5.5394	1.51119	176.94	0.365	1.24	27.94	25.33	2.67	2.5	47.79	6.95	6.96	5.55	1.64	150	2	1.037	25.8784	23.7872	1.8999	1.8693	61.0746	9.3919	7.65766	5.8101	1.67874	158.732	0.7689
H0720	1.1157	26.1479	20.4344	0.886667	2.21787	69.3179	7.14813	6.76019	5.99983	1.59331	143.557	1.04463	1.2301	29.7954	22.846	0.7601	3.2843	67.7092	7.5825	6.0329	6.1894	1.63119	146.94	3.365	1.06	27.09	19.67	0.5	2	70.36	6.13	6.79	5.86	1.52	135	0	1.057	21.5584	18.7872	1.3999	1.3693	69.8846	7.7319	7.45766	5.9501	1.62874	148.732	-0.2311
H0721	0.972367	26.3479	23.5444	0.552333	0.717867	58.9613	5.78147	6.46685	5.26317	1.58664	141.891	2.04463	1.1601	32.8454	25.846	0.7471	0.7843	77.3992	4.6625	6.1029	4.8194	1.59119	146.94	2.365	0.74	21.59	21	0.34	0.5	44.9	5.48	6.17	5	1.64	135	3	1.017	24.6084	23.7872	0.5699	0.8693	54.5846	7.2019	7.12766	5.9701	1.52874	143.732	0.7689
H0722	1.22903	27.4213	21.5477	1.21433	2.38453	70.9046	7.93147	7.57352	6.0265	1.72998	158.557	1.37797	1.3201	30.3054	21.846	1.7431	2.2843	79.5492	9.1725	7.3329	6.3894	1.80119	156.94	-0.635	1.3	26.08	21.67	1	2.5	58.4	8.67	8.72	6.32	1.81	160	2	1.067	25.8784	21.1272	0.8999	2.3693	74.7646	5.9519	6.66766	5.3701	1.57874	158.732	2.7689
H0723	1.0457	23.5846	23.6544	2.54	2.0512	76.8413	8.44147	8.66352	5.9165	1.72664	150.224	1.04463	1.2001	25.3154	24.846	3.0601	2.2843	96.0892	9.3925	10.6129	5.9994	1.77119	146.94	3.365	0.9	22.86	21.33	3.33	2.5	47.73	7.74	7.51	5.8	1.71	145	0	1.037	22.5784	24.7872	1.2299	1.3693	86.7046	8.1919	7.86766	5.9501	1.69874	158.732	-0.2311
H0724	1.3757	26.4913	22.4344	2.65433	1.0512	79.9913	8.61813	7.78352	5.70983	1.81331	160.224	1.37797	1.6001	28.6954	24.846	2.3931	2.2843	95.5792	8.8425	6.9729	5.5094	1.81119	151.94	-0.635	1.36	27.69	20.33	3.67	0	66.75	9.03	8.42	5.89	1.88	165	2	1.167	23.0884	22.1272	1.8999	0.8693	77.6446	7.9819	7.95766	5.7301	1.74874	163.732	2.7689
H0725	1.29903	31.9646	21.6577	1.26333	0.884533	70.4179	7.5548	7.50352	6.11317	1.68664	166.891	1.37797	1.4401	34.3754	21.846	2.0601	-0.2157	92.8392	7.5725	6.2529	6.0794	1.64119	171.94	-0.635	1.27	31.92	21	0.83	1	59.68	7.79	8.19	6.19	1.74	160	2	1.187	29.5984	22.1272	0.8999	1.8693	58.7346	7.3019	8.06766	6.0701	1.67874	168.732	2.7689
H0726	1.18237	28.9446	22.1011	1.87667	0.717867	71.3446	7.9448	7.58685	5.69317	1.78331	163.557	1.7113	1.3001	32.5954	23.846	3.0601	0.7843	77.9592	8.4825	6.4929	5.4794	1.78119	171.94	0.365	1.11	28.36	21.67	1.67	0.5	54.65	7.87	8.28	5.89	1.82	145	2	1.137	25.8784	20.7872	0.8999	0.8693	81.4246	7.4819	7.98766	5.7101	1.74874	173.732	2.7689
H0727	0.882367	20.6479	17.9911	2.541	3.88453	60.8246	10.3181	8.76352	6.57317	1.70331	150.224	0.377967	0.8401	21.3354	18.846	3.3931	3.7843	81.2692	11.6225	8.1329	6.1294	1.66119	146.94	-0.635	0.86	21.17	18	2.67	4	46.87	9.74	9.06	6.81	1.75	140	1	0.947	19.4384	17.1272	1.5599	3.8693	54.3346	9.5919	9.09766	6.7801	1.69874	163.732	0.7689
H0728	1.05903	23.2713	20.7677	1.65433	2.88453	68.4479	7.20147	6.63019	5.70317	1.63664	131.891	1.37797	1.2001	25.3154	21.846	2.3931	2.7843	96.7392	8.0525	5.7129	5.8294	1.65119	116.94	-0.635	0.96	23.11	20	1.67	3.5	50.59	6.57	6.85	5.54	1.63	135	2	1.017	21.3884	20.4572	0.8999	2.3693	58.0146	6.9819	7.32766	5.7401	1.62874	143.732	2.7689
H0729	1.2757	26.1513	23.6544	1.98667	0.5512	85.8346	7.32147	6.81019	5.25317	1.77998	143.557	1.04463	1.5101	27.9354	23.846	2.0601	0.7843	104.529	7.5825	6.1529	5.6894	1.73119	151.94	2.365	1.23	25.57	24.33	2.67	0.5	89.33	7.24	7.24	5.19	1.82	140	1	1.087	24.9484	22.7872	1.2299	0.3693	63.6446	7.1419	7.03766	4.8801	1.78874	138.732	-0.2311
H0730	1.17903	20.8179	21.8811	2.429	1.0512	78.9679	7.94813	6.83352	5.39317	1.76998	141.891	1.7113	1.3801	21.1654	21.846	2.7271	1.2843	83.3292	8.7325	6.4229	5.7894	1.82119	146.94	2.365	1.13	20.74	22.67	3.33	1.5	80.29	8.07	7.02	5.26	1.75	140	2	1.027	20.5484	21.1272	1.2299	0.3693	73.2846	7.0419	7.05766	5.1301	1.73874	138.732	0.7689
H0731	1.2157	24.9379	19.5444	0.437667	2.5512	100.168	8.6048	7.57685	5.92983	1.69331	136.891	1.04463	1.3601	27.0054	19.846	0.0831	2.2843	92.0092	9.3125	6.8329	5.9094	1.63119	141.94	1.365	1.13	23.71	17	0.83	3.5	87.58	7.98	7.76	5.9	1.72	130	1	1.157	24.0984	21.7872	0.3999	1.8693	120.915	8.5219	8.13766	5.9801	1.72874	138.732	0.7689
H0732	1.04903	28.0413	21.8777	0.56	3.38453	70.6346	7.52813	6.74019	5.53317	1.73998	123.557	2.04463	1.1501	31.4054	23.846	0.1101	2.7843	102.609	8.0325	5.5229	5.6694	1.72119	141.94	3.365	1.09	28.79	21.33	1	3.5	47.65	7.52	7.59	5.6	1.81	105	2	0.907	23.9284	20.4572	0.5699	3.8693	61.6446	7.0319	7.10766	5.3301	1.68874	123.732	0.7689
H0733	0.909033	19.4346	17.2144	0.783333	0.884533	42.0513	10.1415	8.82352	5.47983	1.96664	126.891	1.04463	1.0101	21.3354	18.846	0.1101	0.7843	49.1292	10.4025	9.0129	5.1294	1.92119	136.94	2.365	0.79	19.81	18.67	1.67	0.5	35.35	9.79	8.75	5.72	2	125	0	0.927	17.1584	14.1272	0.5699	1.3693	41.6746	10.2319	8.70766	5.5901	1.97874	118.732	0.7689
H0734	1.38903	27.8179	23.9911	0.5	2.21787	72.1113	9.42813	8.19685	5.96317	1.87664	135.224	1.37797	1.7501	30.8154	21.846	0.7601	1.7843	60.3092	9.7125	7.1929	5.9794	1.86119	126.94	2.365	1.43	27.52	28.67	0.17	1.5	82.76	9.23	8.46	5.87	1.89	135	1	0.987	25.1184	21.4572	0.5699	3.3693	73.2646	9.3419	8.93766	6.0401	1.87874	143.732	0.7689
H0735	1.00903	19.3513	19.4344	1.541	2.88453	77.9513	7.9148	6.28352	5.38317	1.67998	135.224	1.37797	1.2001	20.2354	20.846	2.3931	2.7843	70.1092	9.1025	5.7129	5.7994	1.75119	151.94	2.365	0.95	19.81	19	1	3	90.16	7.44	6.56	5.26	1.66	120	2	0.877	18.0084	18.4572	1.2299	2.8693	73.5846	7.2019	6.57766	5.0901	1.62874	133.732	-0.2311
H0736	1.50237	26.0979	22.7677	0.225667	2.71787	69.9813	8.8348	7.67019	5.76317	1.78998	131.891	1.37797	1.8201	27.8554	23.846	0.0971	2.2843	61.7792	9.4125	7.2629	5.7494	1.81119	156.94	1.365	1.47	24.81	23.67	0.34	3	83.24	8.85	8.01	5.84	1.84	115	2	1.217	25.6284	20.7872	0.2399	2.8693	64.9246	8.2419	7.73766	5.7001	1.71874	123.732	0.7689
H0737	0.7857	27.6179	20.4344	0.986667	1.71787	46.0679	7.18813	6.75352	5.54317	1.60331	120.224	1.37797	0.8201	29.0354	24.846	2.0601	2.2843	50.8192	7.2925	5.8329	5.0294	1.57119	141.94	2.365	0.65	28.19	15.67	0.5	1	22.81	6.85	7.37	5.88	1.66	100	2	0.887	25.6284	20.7872	0.3999	1.8693	64.5746	7.4219	7.05766	5.7201	1.57874	118.732	-0.2311
H0738	0.8157	27.7013	22.3244	1.59667	3.0512	55.8513	8.47813	7.39685	6.25983	1.64998	135.224	1.37797	0.8301	32.1654	22.846	2.0601	3.2843	95.8692	8.9125	5.9729	6.2094	1.62119	151.94	3.365	0.82	27.52	20.67	1.67	2.5	20.4	8.43	8.1	6.17	1.71	125	1	0.797	23.4184	23.4572	1.0599	3.3693	51.2846	8.0919	8.11766	6.4001	1.61874	128.732	-0.2311
H0739	1.0857	24.7113	18.6544	1.59667	3.21787	55.7713	8.5448	6.90685	5.58983	1.72331	131.891	1.7113	1.3901	29.2054	19.846	2.0601	3.2843	83.0392	8.7925	6.1129	5.6594	1.78119	161.94	3.365	0.92	19.9	16.33	2	4	20.49	8.39	7.29	5.52	1.74	110	1	0.947	25.0284	19.7872	0.7299	2.3693	63.7846	8.4519	7.31766	5.5901	1.64874	123.732	0.7689
H0740	1.2357	28.3813	20.5444	2.321	2.21787	59.7179	8.0148	7.61685	6.23983	1.72664	138.557	1.04463	1.4901	31.3254	23.846	3.3931	1.7843	65.5492	8.0825	5.9729	6.2694	1.68119	126.94	1.365	1.12	25.82	18.33	2.67	2.5	52.58	7.53	8.08	6.09	1.74	140	1	1.097	27.9984	19.4572	0.8999	2.3693	61.0246	8.4319	8.79766	6.3601	1.75874	148.732	0.7689
H0741	0.9857	26.3213	20.7677	1.70767	3.0512	63.1213	7.4948	6.95019	6.0465	1.61331	138.557	1.37797	1.0201	29.1254	21.846	2.3931	2.7843	79.8792	7.5425	5.9929	6.1294	1.65119	136.94	2.365	0.99	23.71	19	1.67	3	55.42	7.53	7.73	6.15	1.64	140	1	0.947	26.1284	21.4572	1.0599	3.3693	54.0646	7.4119	7.12766	5.8601	1.54874	138.732	0.7689
H0742	1.1357	28.7746	21.5444	0.439	2.5512	64.4546	11.1281	9.79685	6.1165	1.89331	156.891	1.04463	1.3801	30.8154	23.846	0.7471	2.7843	78.5092	13.1025	11.1429	6.0894	1.88119	161.94	1.365	0.97	29.21	21.33	0.17	3	55.62	10.23	8.88	6.08	1.9	155	1	1.057	26.2984	19.4572	0.3999	1.8693	59.2346	10.0519	9.36766	6.1801	1.89874	153.732	0.7689
H0743	1.18237	26.7146	20.7677	2.709	2.71787	72.5246	8.98147	7.33019	5.95317	1.72331	140.224	1.04463	1.6201	32.2554	21.846	2.7271	2.2843	76.1292	10.1225	6.0129	5.9294	1.73119	136.94	2.365	0.95	22.86	19.33	3.67	3	75.21	8.7	8.1	6	1.76	140	1	0.977	25.0284	21.1272	1.7299	2.8693	66.2346	8.1219	7.87766	5.9301	1.67874	143.732	-0.2311
H0744	1.08237	27.0813	20.3244	1.48767	3.0512	47.2079	9.09147	7.10019	5.65317	1.70331	133.557	1.04463	1.0701	32.1654	19.846	2.3931	2.7843	54.4692	8.9725	5.8529	5.2694	1.68119	131.94	2.365	1.13	26.25	20	1.67	3	38.9	9.47	7.84	5.86	1.77	135	1	1.047	22.8284	21.1272	0.3999	3.3693	48.2546	8.8319	7.60766	5.8301	1.65874	133.732	-0.2311
H0745	1.0857	22.4813	22.4344	0.5	3.21787	67.3246	9.58813	7.60352	6.33317	1.64664	153.557	1.04463	1.3701	23.4454	23.846	0.7601	3.2843	66.8692	9.4925	5.6529	5.9494	1.57119	161.94	1.365	0.85	22.69	21.33	0.17	3.5	28.24	9.54	8.53	6.48	1.71	150	1	1.037	21.3084	22.1272	0.5699	2.8693	106.865	9.7319	8.62766	6.5701	1.65874	148.732	0.7689
H0746	1.47903	27.1679	20.3244	1.81767	3.0512	68.4246	10.5581	9.98352	6.77317	1.78664	143.557	1.7113	1.9801	29.2054	19.846	2.3931	3.2843	78.7592	10.6525	11.4829	6.7794	1.81119	131.94	0.365	1.24	26.25	19.67	1.33	2.5	49.79	11.35	9.48	6.81	1.83	155	2	1.217	26.0484	21.4572	1.7299	3.3693	76.7246	9.6719	8.98766	6.7301	1.71874	143.732	2.7689
H0747	0.972367	24.4613	19.7677	1.04333	1.5512	46.1379	6.46813	6.28019	5.36317	1.57998	106.891	2.37797	1.1101	28.9554	23.846	2.0601	1.7843	59.4292	6.8125	5.2329	5.2494	1.50119	131.94	1.365	0.7	22.78	19	0.34	1	13.71	6.24	7.04	5.48	1.68	90	3	1.107	21.6484	16.4572	0.7299	1.8693	65.2746	6.3519	6.56766	5.3601	1.55874	98.7322	2.7689
H0748	1.34237	24.2879	19.5444	1.98567	1.21787	80.1279	9.06147	7.86019	5.41983	1.71331	156.891	1.04463	1.5701	25.3154	17.846	2.7271	2.2843	93.2192	10.0425	7.9029	5.0394	1.57119	161.94	2.365	1.28	24.55	21	0.67	1	74.48	8.06	7.57	5.7	1.74	155	1	1.177	22.9984	19.7872	2.5599	0.3693	72.6846	9.0819	8.10766	5.5201	1.82874	153.732	-0.2311
H0749	0.962367	25.8379	20.6577	2.26433	1.0512	52.6713	9.06147	7.85352	5.69317	1.67998	155.224	1.37797	0.9401	23.1954	19.846	3.3931	2.2843	69.4692	10.8225	7.4029	5.2094	1.57119	166.94	2.365	1.05	25.82	22	2.67	0.5	43.79	8.82	8.4	6.12	1.78	150	2	0.897	28.4984	20.1272	0.7299	0.3693	44.7546	7.5419	7.75766	5.7501	1.68874	148.732	-0.2311
H0750	1.26903	24.7679	21.8811	0.607667	2.21787	61.5346	8.8848	7.75352	5.9065	1.76998	156.891	0.7113	1.4401	25.6554	20.846	0.0831	2.7843	71.2692	9.8925	7.5229	6.0194	1.84119	136.94	1.365	1.21	25.82	23.67	1.17	2	57.21	8.5	8	5.88	1.79	185	1	1.157	22.8284	21.1272	0.5699	1.8693	56.1246	8.2619	7.73766	5.8201	1.67874	148.732	-0.2311
H0751	1.2557	24.1746	24.2111	1.37667	2.5512	76.8713	7.2948	7.34685	5.76317	1.65331	156.891	1.37797	1.5301	24.8854	23.846	2.0601	2.7843	88.1992	8.1025	7.6629	5.7994	1.73119	146.94	3.365	1.1	23.71	23	1.5	2.5	74.23	6.92	7.4	5.86	1.65	165	1	1.137	23.9284	25.7872	0.5699	2.3693	68.1846	6.8619	6.97766	5.6301	1.57874	158.732	-0.2311
H0752	1.3057	26.4313	22.6577	0.222333	2.38453	76.6846	7.59147	6.79685	5.65317	1.61998	151.891	1.7113	1.7101	28.6954	22.846	0.0971	2.2843	94.5592	8.0825	6.1529	5.6594	1.63119	141.94	2.365	1.14	25.74	23	0.17	3	64.98	7.59	7.37	5.66	1.69	150	2	1.067	24.8584	22.1272	0.3999	1.8693	70.5146	7.1019	6.86766	5.6401	1.53874	163.732	0.7689
H0753	0.959033	27.4779	18.8811	1.65433	3.21787	47.7479	7.70813	6.95352	5.63317	1.65998	158.557	1.7113	0.8301	27.8554	17.846	3.3931	2.7843	47.4592	7.1325	5.5929	5.4394	1.53119	171.94	1.365	0.93	28.28	17.67	0.67	3.5	38.78	8.11	7.75	5.72	1.78	150	1	1.117	26.2984	21.1272	0.8999	3.3693	57.0046	7.8819	7.51766	5.7401	1.66874	153.732	2.7689
H0754	0.879033	26.2379	20.7677	1.21667	2.71787	47.2713	7.5848	6.76685	5.76983	1.58664	145.224	0.7113	0.6301	26.5854	21.846	0.7601	2.2843	58.0092	7.8225	5.9429	5.5794	1.55119	156.94	1.365	0.99	26.67	20	1.33	3	23.9	7.34	7.17	5.85	1.64	140	1	1.017	25.4584	20.4572	1.5599	2.8693	59.9046	7.5919	7.18766	5.8801	1.56874	138.732	-0.2311
H0755	0.869033	19.7146	19.6544	1.26433	2.88453	53.5846	6.80147	6.51352	5.22317	1.63331	141.891	1.04463	0.7501	19.3854	18.846	2.3931	2.7843	53.7092	6.8925	5.5029	4.8994	1.54119	176.94	0.365	0.9	19.05	19.33	0.67	3.5	48.3	6.94	7.19	5.49	1.71	120	2	0.957	20.7084	20.7872	0.7299	2.3693	58.7446	6.5719	6.84766	5.2801	1.64874	128.732	0.7689
H0756	1.2357	26.9113	22.3244	0.499	3.0512	66.2113	7.3148	6.75352	5.82317	1.58664	153.557	1.37797	1.5801	29.9654	23.846	0.0971	2.7843	72.3492	7.8325	5.6929	5.8594	1.50119	166.94	2.365	1.08	26.67	21.67	0.34	3	69.12	7.45	7.63	6	1.68	150	1	1.047	24.0984	21.4572	1.0599	3.3693	57.1646	6.6619	6.93766	5.6101	1.57874	143.732	0.7689
H0757	0.799033	26.3213	19.7677	0.662333	3.21787	43.4479	7.11813	6.99352	6.0165	1.59998	156.891	1.04463	0.7501	27.8554	18.846	0.7471	2.7843	56.6292	6.6225	5.5329	6.0094	1.52119	171.94	1.365	0.86	26.5	21	0.67	3	29.13	7.39	7.78	6.05	1.67	145	1	0.787	24.6084	19.4572	0.5699	3.8693	44.5846	7.3419	7.66766	5.9901	1.60874	153.732	0.7689
H0758	0.979033	27.5346	19.6577	2.09433	3.38453	61.0446	8.92813	7.33352	6.02983	1.67331	135.224	1.04463	0.6301	24.8054	17.846	2.3931	3.2843	51.4492	8.2925	5.6629	5.7294	1.60119	121.94	1.365	1.41	30.48	22	1.33	3.5	74.2	10.12	8.85	6.43	1.81	150	1	0.897	27.3184	19.1272	2.5599	3.3693	57.4846	8.3719	7.48766	5.9301	1.60874	133.732	0.7689
H0759	0.712367	23.0746	18.6577	0.494333	3.38453	38.0379	6.61813	6.62352	5.23317	1.64664	146.891	0.377967	0.3201	19.0454	15.846	0.0831	3.2843	36.2392	6.2725	5.9729	5.1394	1.53119	161.94	-0.635	1.02	27.09	20.67	0.83	3	27.06	6.63	7.02	5.27	1.76	145	1	0.797	23.0884	19.4572	0.5699	3.8693	50.8146	6.9519	6.87766	5.2901	1.64874	133.732	0.7689
H0760	0.8457	25.6713	19.8777	1.70567	2.88453	58.3846	8.03147	7.03685	6.12317	1.64331	143.557	1.04463	0.8301	29.7954	20.846	2.7271	3.2843	51.6692	9.0925	5.8129	6.3294	1.66119	156.94	2.365	0.89	23.71	21.33	0.83	2.5	72.85	7.27	7.67	6.07	1.65	140	1	0.817	23.5084	17.4572	1.5599	2.8693	50.6346	7.7319	7.62766	5.9701	1.61874	133.732	-0.2311
H0761	1.40903	25.8413	20.2111	0.5	2.88453	54.6546	7.4148	6.91019	5.6765	1.72331	140.224	0.377967	1.3101	26.5854	19.846	0.7601	2.7843	43.6092	6.9225	5.7829	5.8194	1.72119	141.94	0.365	1.75	26.92	22	0.34	3	49.16	8.15	7.78	5.87	1.74	145	0	1.167	24.0184	18.7872	0.3999	2.8693	71.1946	7.1719	7.16766	5.3401	1.70874	133.732	0.7689
H0763	1.27903	27.6179	21.5444	0.99	2.0512	63.6413	7.06813	6.62019	5.8365	1.60664	163.557	1.7113	1.6801	31.8354	23.846	1.4101	2.7843	73.8592	7.8225	5.7229	6.2294	1.60119	176.94	1.365	1.2	27.6	22.33	0.83	2.5	66.67	6.76	7.26	5.74	1.65	150	1	0.957	23.4184	18.4572	0.7299	0.8693	50.3946	6.6219	6.87766	5.5401	1.56874	163.732	2.7689
H0764	0.969033	18.8713	18.5477	0.274333	2.71787	52.9513	7.46147	6.82352	5.87983	1.59331	146.891	1.04463	0.7801	16.8454	16.846	0.0831	3.2843	45.0392	7.1025	6.0429	6.0094	1.59119	156.94	-0.635	1.15	20.66	19.67	0.34	2.5	52.7	7.45	7.06	5.73	1.61	140	1	0.977	19.1084	19.1272	0.3999	2.3693	61.1146	7.8319	7.36766	5.9001	1.57874	143.732	2.7689
H0765	1.08903	22.8213	20.7677	0.389	3.21787	51.9679	8.50813	7.30019	5.85983	1.79664	136.891	2.04463	1.3101	24.1254	20.846	0.0971	2.7843	49.9092	8.1225	5.8229	6.0994	1.78119	166.94	1.365	0.98	21.51	20.67	0.5	3.5	50.98	9	7.81	5.75	1.79	125	2	0.977	22.8284	20.7872	0.5699	3.3693	55.0146	8.4019	8.26766	5.7301	1.81874	118.732	2.7689
H0766	1.18237	25.3313	20.5477	1.87433	3.0512	57.1213	7.6348	6.93685	5.5465	1.71664	131.891	1.7113	1.3501	25.5654	23.846	2.3931	3.2843	63.5792	7.2625	5.6829	5.4694	1.66119	151.94	3.365	1.28	26.84	19.67	2.33	2.5	65.78	7.66	7.44	5.53	1.77	135	1	0.917	23.5884	18.1272	0.8999	3.3693	42.0046	7.9819	7.68766	5.6401	1.71874	108.732	0.7689
H0767	1.26903	31.3979	22.2111	0.45	2.71787	44.8346	7.9948	7.34685	5.5365	1.72664	145.224	2.04463	1.6701	33.3554	21.846	0.1101	1.2843	47.7292	6.5025	6.4629	5.0794	1.68119	166.94	0.365	1.04	32.17	22.33	0.34	3.5	32.98	9.54	8.26	5.91	1.83	135	3	1.097	28.6684	22.4572	0.8999	3.3693	53.7946	7.9419	7.31766	5.6201	1.66874	133.732	2.7689
H0769	0.949033	24.7146	19.9911	1.70767	1.21787	46.5513	7.4248	6.60685	5.68983	1.69331	128.557	2.7113	0.9001	21.5054	17.846	2.3931	1.7843	53.2692	7.4625	5.0929	6.0594	1.67119	156.94	2.365	0.9	26.08	20.67	0.83	0.5	41.78	7.07	6.94	5.44	1.67	115	3	1.047	26.5584	21.4572	1.8999	1.3693	44.6046	7.7419	7.78766	5.5701	1.73874	113.732	2.7689
H0770	1.1157	24.8246	24.3244	1.37767	2.0512	46.7879	7.92813	7.01685	5.48317	1.69664	136.891	2.04463	0.9501	23.0254	23.846	2.3931	0.7843	47.9392	7.2525	5.8629	5.3494	1.57119	146.94	1.365	1.24	27.01	23.67	1.17	3	48.72	8.66	7.74	5.58	1.83	130	2	1.157	24.4384	25.4572	0.5699	2.3693	43.7046	7.8719	7.44766	5.5201	1.68874	133.732	2.7689
H0771	1.00237	24.8513	21.7677	1.38	2.38453	57.8813	7.9048	7.28685	5.91983	1.59998	143.557	1.04463	0.8701	25.0554	20.846	1.4101	2.2843	56.3692	8.0225	6.6029	5.6894	1.53119	146.94	1.365	1.04	23.71	22	0.67	3	60.75	7.26	7.24	5.9	1.61	145	1	1.097	25.7884	22.4572	2.0599	1.8693	56.5246	8.4319	8.01766	6.1701	1.65874	138.732	0.7689
H0772	0.822367	24.2613	19.9911	0.936667	1.71787	44.7813	6.7648	7.12019	4.96983	1.55998	130.224	1.37797	0.7101	21.1654	21.846	1.4101	1.7843	46.7892	7.1625	7.1929	4.1994	1.29119	141.94	1.365	0.87	25.99	20.67	0.17	0.5	32.48	6.55	6.8	5.14	1.72	115	2	0.887	25.6284	17.4572	1.2299	2.8693	55.0746	6.5819	7.36766	5.5701	1.66874	133.732	0.7689
H0773	1.01903	24.0879	21.9911	2.761	1.88453	77.1646	7.2748	7.37352	5.2265	1.59331	146.891	0.377967	1.0901	24.5454	22.846	2.3931	2.2843	70.3392	8.9525	8.4529	4.9394	1.50119	156.94	-0.635	1.04	24.38	20.67	3.33	1.5	53.45	6.52	6.93	5.43	1.67	145	1	0.927	23.3384	22.4572	2.5599	1.8693	107.705	6.3519	6.73766	5.3101	1.60874	138.732	0.7689
H0774	0.9257	27.1379	21.2111	0.547667	0.884533	67.3246	6.0948	5.99685	5.12983	1.53998	151.891	1.04463	0.9101	28.9554	21.846	0.0831	0.7843	67.8992	6.3725	5.2029	5.0394	1.46119	151.94	1.365	0.87	24.72	20	0.83	1	68.49	6.02	6.54	5.26	1.62	150	1	0.997	27.7384	21.7872	0.7299	0.8693	65.5846	5.8919	6.24766	5.0901	1.53874	153.732	0.7689
H0775	1.0657	25.5579	22.9911	1.05	1.71787	65.3379	7.55813	7.00352	5.57983	1.68331	133.557	0.0446333	0.9001	28.4454	21.846	1.4101	1.7843	68.5192	7.7225	6.0729	5.4494	1.64119	131.94	-0.635	1.27	24.98	22.67	1.17	1	71.46	7.27	7.33	5.57	1.71	130	1	1.027	23.2484	24.4572	0.5699	2.3693	56.0346	7.6819	7.60766	5.7201	1.69874	138.732	-0.2311
H0776	1.1057	23.4713	18.9911	0.499	1.0512	62.4546	8.4748	7.44019	5.8565	1.82998	143.557	1.04463	1.0101	22.3454	17.846	0.0971	1.7843	61.3892	9.7325	6.6329	6.2494	1.93119	131.94	2.365	1.22	24.98	20	0.34	1	65.39	8.17	8.02	5.72	1.83	145	1	1.087	23.0884	19.1272	1.0599	0.3693	60.5846	7.5219	7.66766	5.6001	1.72874	153.732	-0.2311
H0777	0.7257	17.9646	19.5444	0.826667	1.21787	44.3146	6.50813	6.67685	5.0365	1.72998	136.891	2.04463	0.4101	17.0154	18.846	1.4101	1.7843	41.0492	5.6725	6.3029	4.8894	1.69119	146.94	2.365	1.02	22.01	23.33	0.67	1	55.54	7.02	6.82	5.11	1.78	150	1	0.747	14.8684	16.4572	0.3999	0.8693	36.3546	6.8319	6.90766	5.1101	1.71874	113.732	2.7689
H0778	0.812367	23.8379	20.5444	1.05333	1.71787	45.3146	8.6548	7.26352	5.67983	1.71998	143.557	1.7113	0.1501	12.6154	12.846	0.7601	2.7843	36.1292	7.7425	5.5329	5.3494	1.59119	146.94	2.365	1.28	29.89	24	1.67	1	37.26	9.09	8.17	5.81	1.84	145	2	1.007	29.0084	24.7872	0.7299	1.3693	62.5546	9.1319	8.08766	5.8801	1.72874	138.732	0.7689
H0779	1.1557	26.0946	21.9877	0.279	2.38453	74.9613	8.3848	7.31352	6.0365	1.62331	146.891	0.7113	1.3201	29.1254	23.846	0.0971	1.7843	73.3892	8.9125	6.6229	6.2194	1.56119	146.94	-0.635	1.09	26.92	22.33	0.5	3.5	87.07	8.78	7.95	6.07	1.71	150	2	1.057	22.2384	19.7872	0.2399	1.8693	64.4246	7.4619	7.36766	5.8201	1.59874	143.732	0.7689
H0780	1.1257	22.5646	22.9911	0.88	1.88453	54.9446	8.1148	6.80352	5.56983	1.69331	139.366	0.377967	1.0601	21.2454	21.846	1.4101	2.2843	51.0292	7.7925	5.5629	5.6694	1.62119	NA	-1.635	1.24	23.79	25	0.83	1.5	58.85	8.15	7.19	5.41	1.74	150	2	1.077	22.6584	22.1272	0.3999	1.8693	54.9546	8.4019	7.65766	5.6301	1.71874	128.732	0.7689
H0781	1.1057	18.4779	19.4344	1.929	2.71787	47.5046	9.13813	7.12352	5.5865	1.75664	140.224	-0.2887	0.9101	16.5954	17.846	2.7271	1.7843	46.5392	8.9925	5.7629	5.4294	1.69119	146.94	-0.635	1.31	18.8	19.67	1.33	3	57.89	9.32	7.86	5.71	1.82	145	0	1.097	20.0384	20.7872	1.7299	3.3693	38.0846	9.1019	7.74766	5.6201	1.75874	128.732	-0.2311
H0782	1.13237	25.5879	23.9877	1.32	1.21787	56.4379	7.1648	6.29685	5.21983	1.61998	146.891	0.7113	1.2501	26.4154	23.846	2.0601	2.2843	55.3792	7.0325	5.1329	5.0194	1.54119	151.94	2.365	1.03	25.4	24.33	0.34	0.5	74.02	6.5	6.26	5.14	1.62	150	0	1.117	24.9484	23.7872	1.5599	0.8693	39.9146	7.9619	7.49766	5.5001	1.69874	138.732	-0.2311
H0783	0.732367	21.5113	16.9877	0.546667	2.38453	35.8946	4.8748	5.74019	5.45983	1.42664	135.224	-0.2887	-0.1799	11.1354	7.846	0.0701	3.7843	34.9792	0.7425	3.5029	5.2094	1.12119	126.94	-0.635	1.13	25.32	19.33	1	2	30.54	7.13	7.01	5.69	1.61	140	0	1.247	28.0784	23.7872	0.5699	1.3693	42.1646	6.7519	6.70766	5.4801	1.54874	138.732	-0.2311
H0784	1.0557	22.5646	21.7677	0.384333	3.0512	44.2546	8.47813	6.94019	5.8165	1.64664	138.557	0.0446333	0.8901	20.6554	21.846	0.0831	3.2843	45.7392	7.9825	5.4529	5.8094	1.55119	146.94	0.365	1.24	25.06	24.33	0.34	3.5	40.93	8.72	7.74	5.88	1.72	140	0	1.037	21.9784	19.1272	0.7299	2.3693	46.0946	8.7319	7.62766	5.7601	1.66874	128.732	-0.2311
H0791	1.05903	24.7379	21.1011	1.05333	2.71787	70.9179	7.85813	7.14685	5.64983	1.58664	133.557	0.0446333	1.1901	28.5254	21.846	0.7601	2.7843	70.7792	8.3625	7.6729	5.6894	1.61119	116.94	-0.635	0.97	23.11	23	1	3	69.12	7.54	6.93	5.67	1.61	135	1	1.017	22.5784	18.4572	1.3999	2.3693	72.8546	7.6719	6.83766	5.5901	1.53874	148.732	-0.2311
H0792	1.0157	21.3213	22.7677	0.5	1.71787	55.1246	6.61147	6.56685	5.44983	1.57998	136.891	0.0446333	1.3001	24.5454	25.846	0.7601	2.2843	58.6192	6.6425	6.1429	5.2994	1.54119	136.94	-0.635	0.83	20.91	23	0.17	2	38.66	6.66	6.99	5.54	1.67	130	1	0.917	18.5084	19.4572	0.5699	0.8693	68.0946	6.5319	6.56766	5.5101	1.52874	143.732	-0.2311
H0793	1.05237	23.8046	21.6544	1.70567	3.0512	76.7413	7.0548	6.48019	5.99983	1.49998	136.891	1.04463	1.0801	24.8854	22.846	2.7271	2.7843	78.0192	7.0725	5.7229	6.1194	1.49119	146.94	1.365	1.12	24.55	21.33	1.33	3	78.08	6.82	6.72	5.81	1.53	130	1	0.957	21.9784	20.7872	1.0599	3.3693	74.1246	7.2719	6.99766	6.0701	1.47874	133.732	0.7689
H0794	0.912367	25.4146	20.4344	1.37567	2.38453	47.2613	8.16813	6.74352	5.58317	1.62664	128.557	1.7113	0.7801	23.1954	18.846	2.7271	2.7843	37.4992	8.6225	5.7029	5.4794	1.55119	141.94	0.365	0.8	25.99	21	0.34	2.5	47.61	8.05	7.22	5.69	1.67	125	2	1.157	27.0584	21.4572	1.0599	1.8693	56.6746	7.8319	7.30766	5.5801	1.65874	118.732	2.7689
H0795	0.9657	19.3213	21.3211	1.98433	2.21787	55.5246	8.52813	7.55019	5.95317	1.72331	145.224	0.7113	1.1001	17.0954	21.846	2.3931	2.2843	59.5592	9.1025	7.1629	6.3794	1.71119	161.94	0.365	0.93	22.44	22.33	2.33	2.5	68.01	8.37	7.86	5.99	1.71	140	1	0.867	18.4284	19.7872	1.2299	1.8693	39.0046	8.1119	7.62766	5.4901	1.74874	133.732	0.7689
H0796	1.06903	27.2246	20.4344	0.72	2.71787	47.7713	9.12813	6.88685	5.83983	1.64331	145.224	1.04463	1.1601	28.1054	22.846	0.7601	3.2843	58.1092	9.4325	5.2329	5.6494	1.58119	151.94	1.365	0.91	25.74	18.33	0.67	3	44	8.66	7.34	5.76	1.67	140	1	1.137	27.8284	20.1272	0.7299	1.8693	41.2046	9.2919	8.08766	6.1101	1.67874	143.732	0.7689
H0801	1.20903	23.0746	19.6577	0.217667	2.71787	80.2413	8.51147	7.06685	5.83983	1.70331	145.224	0.377967	1.2101	20.6554	18.846	0.0831	2.2843	84.4792	9.3125	6.1529	6.0894	1.73119	156.94	-0.635	1.24	23.71	20	0.17	3.5	98.12	8.19	7.68	5.83	1.72	150	1	1.177	24.8584	20.1272	0.3999	2.3693	58.1246	8.0319	7.36766	5.6001	1.65874	128.732	0.7689
H0802	0.652367	24.2579	16.3244	1.16333	0.717867	25.2813	7.6348	7.29352	5.41317	1.79331	110.224	0.7113	0.4001	23.0254	14.846	0.7601	0.7843	36.0992	5.8625	6.5929	5.2194	1.76119	146.94	0.365	0.61	23.79	15.67	2	0.5	4.52	8.9	7.6	5.52	1.84	95	1	0.947	25.9584	18.4572	0.7299	0.8693	35.2246	8.1419	7.68766	5.5001	1.77874	88.7322	0.7689
H0803	1.07237	24.0613	21.9911	0.556667	3.21787	71.0213	7.39147	6.61352	5.7665	1.53998	133.557	1.04463	1.2001	27.0054	25.846	0.1101	3.2843	87.6892	7.8825	5.8829	5.7594	1.50119	131.94	1.365	1	23.28	20	0.83	3.5	81.4	7.35	7.12	5.82	1.61	150	1	1.017	21.8984	20.1272	0.7299	2.8693	43.9746	6.9419	6.83766	5.7201	1.50874	118.732	0.7689
H0804	0.952367	20.5079	20.1011	0.225667	3.0512	58.5013	7.3448	6.73019	5.84983	1.61998	130.224	1.37797	0.9701	21.8454	23.846	0.0971	2.2843	61.1092	7.4825	5.4429	5.9994	1.55119	146.94	2.365	0.93	18.97	17.33	0.34	3.5	67.37	7.16	7.23	5.7	1.67	130	1	0.957	20.7084	19.1272	0.2399	3.3693	47.0246	7.3919	7.51766	5.8501	1.63874	113.732	0.7689
H0805	1.05903	25.8946	18.8777	0.771	2.88453	48.5379	7.9748	6.68685	5.59317	1.63664	128.557	1.04463	0.9501	28.6954	18.846	0.0831	2.7843	52.8492	8.8125	5.9129	5.7094	1.59119	146.94	1.365	1.12	24.72	19	1.5	3	51.62	6.56	6.4	5.28	1.61	130	1	1.107	24.2684	18.7872	0.7299	2.8693	41.1446	8.5519	7.74766	5.7901	1.70874	108.732	0.7689
H0806	0.9757	26.3213	20.7677	1.321	2.38453	44.4313	7.97147	6.90685	5.76317	1.67664	133.557	0.377967	0.8201	23.1954	18.846	2.3931	1.7843	42.2292	8.3625	5.7229	6.0494	1.60119	131.94	-0.635	1.02	25.32	20.33	0.17	3	42.71	7.4	7.1	5.51	1.7	135	1	1.087	30.4484	23.1272	1.3999	2.3693	48.3546	8.1519	7.89766	5.7301	1.72874	133.732	0.7689
H0807	1.12903	23.3846	23.3211	1.709	2.5512	66.7246	7.44147	7.15019	5.8965	1.62998	163.557	0.7113	1.0401	25.3954	22.846	2.7271	2.7843	50.6092	7.3825	6.4829	5.9694	1.58119	171.94	1.365	1.07	21.25	22.33	0.17	2	67.62	6.96	7.28	5.74	1.67	160	1	1.277	23.5084	24.7872	2.2299	2.8693	81.9446	7.9819	7.68766	5.9801	1.63874	158.732	-0.2311
H0808	0.7657	19.3213	18.7677	0.323333	3.21787	57.7613	6.7648	6.65352	5.75317	1.52331	141.891	1.04463	0.7101	21.2454	18.846	0.0701	2.2843	60.9192	7.1625	6.0929	5.6994	1.46119	151.94	2.365	0.71	18.63	18.67	0.17	4	48.06	5.98	6.81	5.78	1.55	140	1	0.877	18.0884	18.7872	0.7299	3.3693	64.3046	7.1519	7.05766	5.7801	1.55874	133.732	-0.2311
H0809	1.01237	23.4979	22.3244	2.48567	3.0512	70.3746	7.3248	6.19685	5.43983	1.53998	136.891	1.04463	1.2401	26.9254	26.846	2.7271	3.2843	75.5792	8.2225	5.5229	5.5494	1.48119	111.94	2.365	0.94	22.01	21	3.67	3.5	56.01	6.6	6.65	5.52	1.59	140	1	0.857	21.5584	19.1272	1.0599	2.3693	79.5346	7.1519	6.41766	5.2501	1.54874	158.732	-0.2311
H0810	0.969033	24.1746	23.6577	1.00333	3.0512	71.8113	6.5648	6.27352	5.04983	1.58664	150.224	1.04463	1.1201	26.2454	25.846	0.1101	2.7843	83.9892	7.1325	6.6129	4.8194	1.69119	146.94	2.365	0.76	22.69	19.67	2	3.5	76.1	5.99	6.07	5.15	1.55	155	1	1.027	23.5884	25.4572	0.8999	2.8693	55.3446	6.5719	6.13766	5.1801	1.51874	148.732	-0.2311
H0811	1.43903	30.3846	24.3244	1.87433	3.5512	78.6313	6.7248	6.12685	5.33983	1.59664	136.891	1.37797	1.8101	32.5054	24.846	2.3931	3.7843	79.9392	6.5425	5.3629	5.4694	1.60119	136.94	3.365	1.2	30.48	24	2.33	3.5	92.41	6.15	6.3	5.28	1.57	140	1	1.307	28.1684	24.1272	0.8999	3.3693	63.5446	7.4819	6.71766	5.2701	1.61874	133.732	-0.2311
H0812	0.879033	22.7079	21.2111	0.106667	3.0512	39.2846	6.9148	6.86352	5.4065	1.60664	126.891	1.37797	0.8801	20.0654	18.846	0.0701	3.2843	45.3692	7.1025	7.6929	5.5894	1.66119	151.94	2.365	0.79	23.96	21	0.01	3.5	33.91	6.23	6.17	5.2	1.58	115	2	0.967	24.0984	23.7872	0.2399	2.3693	38.5746	7.4119	6.72766	5.4301	1.57874	113.732	-0.2311
H0813	0.7457	23.3013	19.3244	2.541	2.71787	48.6279	7.49813	7.13019	5.82983	1.60331	143.557	0.377967	0.2601	19.8954	17.846	2.3931	3.7843	39.8192	7.0625	6.3029	5.7594	1.51119	156.94	-0.635	1.11	25.32	19.67	2.67	2.5	49.61	7.79	7.75	5.98	1.69	145	1	0.867	24.6884	20.4572	2.5599	1.8693	56.4546	7.6419	7.33766	5.7501	1.60874	128.732	0.7689
H0814	1.0857	26.7413	20.4344	0.327667	2.38453	43.6879	7.1748	6.41352	5.8265	1.55331	135.224	1.37797	0.8701	26.1554	20.846	0.0831	2.2843	42.7892	7.0025	5.0629	5.8794	1.49119	146.94	3.365	1.1	25.57	20.67	0.17	2	50.1	7.25	6.96	5.75	1.6	135	1	1.287	28.4984	19.7872	0.7299	2.8693	38.1746	7.2719	7.21766	5.8501	1.56874	123.732	-0.2311
H0815	1.1757	24.1713	20.3244	2.26233	2.38453	53.6146	7.6548	6.74685	5.43317	1.65331	146.891	1.04463	1.0401	22.0054	18.846	2.7271	2.2843	62.6992	7.8225	6.2729	5.2294	1.66119	141.94	1.365	1.39	25.82	20	3.33	2.5	44.61	7.3	6.9	5.48	1.67	150	1	1.097	24.6884	22.1272	0.7299	2.3693	53.5346	7.8419	7.06766	5.5901	1.62874	148.732	0.7689
H0816	0.989033	25.6713	23.2111	0.327667	2.21787	49.9279	6.55147	6.33352	5.4265	1.52331	125.224	1.37797	1.0601	27.0054	23.846	0.0831	2.7843	53.7092	6.7825	6.4429	5.3794	1.55119	136.94	3.365	0.88	23.2	23.33	0.17	2	35.08	5.71	5.87	5.32	1.48	115	1	1.027	26.8084	22.4572	0.7299	1.8693	60.9946	7.1619	6.68766	5.5801	1.53874	123.732	-0.2311
H0817	1.2757	26.9946	22.4344	2.43233	2.0512	66.5646	7.44813	7.65019	6.0165	1.70331	140.224	1.7113	1.4201	28.6954	22.846	2.7271	2.7843	55.4092	7.0825	7.1629	6.1394	1.68119	126.94	2.365	1.31	26.75	23.33	2.67	1.5	87.38	7.98	8.13	6.02	1.78	145	2	1.097	25.5384	21.1272	1.8999	1.8693	56.9046	7.2819	7.65766	5.8901	1.64874	148.732	0.7689
H0818	0.9157	21.9179	17.8811	1.16	3.0512	38.4613	9.06147	8.75019	6.41317	1.81331	150.224	1.37797	0.5401	19.9754	15.846	1.4101	2.2843	39.4892	8.9625	6.9429	6.0394	1.66119	156.94	-0.635	1.02	22.86	18.67	1.17	3.5	23.88	8.62	9.47	6.51	1.91	145	2	1.187	22.9184	19.1272	0.8999	3.3693	52.0146	9.6019	9.83766	6.6901	1.86874	148.732	2.7689
H0819	1.07237	21.3813	19.2144	1.10667	3.5512	59.6913	8.31813	7.84352	6.44317	1.62664	141.891	0.377967	1.1801	20.6554	18.846	0.7601	3.7843	59.4092	8.5325	6.6329	6.4094	1.51119	131.94	-0.635	1	21.51	20.67	1.33	3.5	67.04	8	8.42	6.44	1.7	145	0	1.037	21.9784	18.1272	1.2299	3.3693	52.6246	8.4219	8.47766	6.4801	1.66874	148.732	1.7689
H0820	0.979033	27.4779	23.4344	3.09767	1.88453	53.6479	8.0122	6.54028	6.17975	1.60496	146.891	1.37797	0.8501	27.0054	23.846	3.3931	1.7843	62.3592	8.5425	5.2929	6.2594	1.58119	141.94	2.365	1.03	27.94	24.33	3	2	51.21	NA	NA	NA	NA	155	0	1.057	27.4884	22.1272	2.8999	1.8693	47.3746	7.4819	7.78766	6.1001	1.62874	143.732	1.7689
H0821	1.04903	23.2146	23.1011	1.929	3.0512	88.6479	8.27147	7.38352	6.0165	1.72331	140.224	2.04463	1.1901	25.1454	24.846	2.7271	2.7843	83.9992	8.5325	6.1229	5.9494	1.72119	126.94	1.365	0.95	22.01	22.67	2	3.5	112.15	8.15	7.86	5.91	1.77	160	2	1.007	22.4884	21.7872	1.0599	2.8693	69.7946	8.1319	8.16766	6.1901	1.67874	133.732	2.7689
H0822	1.17237	21.7779	18.3244	3.32	2.5512	52.3413	9.4148	8.26685	6.0365	1.87664	135.224	0.7113	1.2401	20.5754	18.846	3.0601	2.7843	54.9692	9.6225	6.4329	5.9194	1.76119	141.94	0.365	1.03	21.93	18.67	3	2	58.6	8.61	8.6	5.92	1.9	135	0	1.247	22.8284	17.4572	3.8999	2.8693	43.4546	10.0119	9.76766	6.2701	1.96874	128.732	1.7689
H0823	0.649033	22.2579	20.7677	1.109	2.38453	50.4546	7.77813	7.06352	5.8565	1.63664	145.224	1.04463	0.2101	23.1154	21.846	0.0971	2.2843	48.3292	6.6925	4.7729	5.3394	1.46119	156.94	0.365	0.89	22.44	22.67	2	3	56.45	8.43	8.07	5.97	1.76	145	0	0.847	21.2184	17.7872	1.2299	1.8693	46.5846	8.2119	8.34766	6.2601	1.68874	133.732	2.7689
H0824	0.902367	22.1746	19.2111	1.10433	2.5512	37.5646	8.76813	7.95352	6.3065	1.71664	131.891	0.7113	0.3001	16.7654	15.846	1.7431	1.7843	37.3792	6.9825	5.4729	5.8994	1.51119	161.94	-0.635	1.14	23.71	20	0.67	3	35.16	10.43	9.45	6.63	1.87	120	0	1.267	26.0484	21.7872	0.8999	2.8693	40.1546	8.8919	8.93766	6.3901	1.76874	113.732	2.7689
H0827	1.14237	24.7113	21.6544	2.87433	2.38453	52.8513	8.4948	6.96352	5.77983	1.71664	141.891	0.7113	1.0601	23.1954	20.846	3.3931	1.7843	47.4892	8.3125	5.6229	5.8294	1.73119	136.94	-0.635	1.18	23.96	21.33	3	2.5	45.58	8.45	7.5	5.71	1.72	135	1	1.187	26.9784	22.7872	2.2299	2.8693	65.4846	8.7219	7.76766	5.8001	1.69874	153.732	1.7689
H0828	1.33237	24.5713	20.9877	3.099	2.38453	53.9079	8.82147	7.68685	6.2565	1.80664	143.557	1.04463	1.5001	23.7054	19.846	3.7271	2.2843	52.7692	9.0425	6.1629	6.5494	1.86119	126.94	-0.635	1.14	24.3	21.33	2.67	2.5	55.78	9.08	8.34	6.14	1.79	150	2	1.357	25.7084	21.7872	2.8999	2.3693	53.1746	8.3419	8.55766	6.0801	1.76874	153.732	1.7689
H0829	0.972367	24.0913	22.7677	1.54333	3.0512	50.6579	6.32147	6.18685	5.28317	1.63331	130.224	1.7113	1.0001	25.7354	24.846	2.0601	2.7843	52.8792	5.8725	5.1829	5.3294	1.62119	116.94	1.365	0.85	22.44	22	1.67	3.5	47.36	6.69	6.78	5.28	1.69	130	2	1.067	24.0984	21.4572	0.8999	2.8693	51.7346	6.4019	6.59766	5.2401	1.58874	143.732	1.7689
H0830	0.6757	19.8846	20.8777	2.98767	1.0512	53.7079	5.45147	6.01685	5.1565	1.54664	141.891	1.37797	0.3201	19.3054	19.846	3.3931	0.2843	39.6892	4.9425	5.6729	5.1594	1.53119	151.94	2.365	0.75	19.3	21	3.67	0.5	66.81	5.57	6.28	5.25	1.58	125	1	0.957	21.0484	21.7872	1.8999	2.3693	54.6246	5.8419	6.09766	5.0601	1.52874	148.732	0.7689
H0831	1.05903	31.3746	21.7677	3.26567	3.38453	50.4013	9.90813	7.50352	6.0665	1.86664	136.891	1.7113	0.9601	31.9154	21.846	3.7271	2.7843	40.2792	9.3425	5.4729	6.1194	1.96119	96.9402	3.365	1.12	30.23	22	3.67	3.5	56.89	10.9	9.05	6.24	1.9	150	1	1.097	31.9784	21.4572	2.3999	3.8693	54.0346	9.4819	7.98766	5.8401	1.73874	163.732	0.7689
H0832	0.959033	21.3813	20.3244	2.76333	2.88453	67.3813	10.0848	8.66352	6.3065	1.73998	150.224	0.7113	0.9301	18.2854	19.846	4.0601	3.2843	55.9292	10.8825	8.3929	6.3294	1.64119	151.94	-0.635	0.94	22.1	20	2.67	3	65.31	9.62	8.67	6.29	1.8	150	2	1.007	23.7584	21.1272	1.5599	2.3693	80.9046	9.7519	8.92766	6.3001	1.77874	148.732	0.7689
